# Supplementary material for: Integration of Transcriptomics, Proteomics, and MicroRNA Analyses Reveals Novel MicroRNA Regulation of Targets in the Mammalian Inner Ear
Source: PLoS One. 2011 Apr 5;6(4):e18195. doi: 10.1371/journal.pone.0018195 (PMC3071727; doi:10.1371/journal.pone.0018195)
Supplement: Table S1 — miRNA detected in cochlear and vestibular sensory epithelia. (XLS) [file pone.0018195.s002.xls]

## Sheet: Sheet1
Tissue detected	miRNA
co	mmu-let-7b
co	mmu-let-7c
co	mmu-let-7d
co	mmu-let-7e
co	mmu-let-7f
co	mmu-let-7g
co	mmu-let-7i
co	mmu-miR-100
co	mmu-miR-101b
co	mmu-miR-103
co	mmu-miR-106a
co	mmu-miR-106b
co	mmu-miR-107
co	mmu-miR-124a
co	mmu-miR-125a
co	mmu-miR-125b
co	mmu-miR-126-3p
co	mmu-miR-126-5p
co	mmu-miR-130a
co	mmu-miR-130b
co	mmu-miR-135b
co	mmu-miR-137
co	mmu-miR-140
co	mmu-miR-140*
co	mmu-miR-141
co	mmu-miR-142-3p
co	mmu-miR-143
co	mmu-miR-148a
co	mmu-miR-148b
co	mmu-miR-152
co	mmu-miR-154
co	mmu-miR-15a
co	mmu-miR-15b
co	mmu-miR-16
co	mmu-miR-17-5p
co	mmu-miR-18
co	mmu-miR-181a
co	mmu-miR-181a*
co	mmu-miR-181b
co	mmu-miR-181d
co	mmu-miR-182
co	mmu-miR-183
co	mmu-miR-185
co	mmu-miR-190
co	mmu-miR-191
co	mmu-miR-193
co	mmu-miR-195
co	mmu-miR-199a
co	mmu-miR-199a*
co	mmu-miR-199b
co	mmu-miR-19a
co	mmu-miR-19b
co	mmu-miR-200a
co	mmu-miR-200b
co	mmu-miR-200c
co	mmu-miR-204
co	mmu-miR-205
co	mmu-miR-20a
co	mmu-miR-20b
co	mmu-miR-21
co	mmu-miR-212
co	mmu-miR-218
co	mmu-miR-22
co	mmu-miR-221
co	mmu-miR-222
co	mmu-miR-223
co	mmu-miR-23a
co	mmu-miR-23b
co	mmu-miR-24
co	mmu-miR-24*
co	mmu-miR-25
co	mmu-miR-26a
co	mmu-miR-26b
co	mmu-miR-27a
co	mmu-miR-27b
co	mmu-miR-28
co	mmu-miR-290
co	mmu-miR-292-5p
co	mmu-miR-298
co	mmu-miR-29a
co	mmu-miR-29b
co	mmu-miR-29c
co	mmu-miR-301
co	mmu-miR-30a-3p
co	mmu-miR-30a-5p
co	mmu-miR-30b
co	mmu-miR-30c
co	mmu-miR-30d
co	mmu-miR-30e
co	mmu-miR-31
co	mmu-miR-32
co	mmu-miR-320
co	mmu-miR-326
co	mmu-miR-331
co	mmu-miR-335
co	mmu-miR-338
co	mmu-miR-339
co	mmu-miR-345
co	mmu-miR-34a
co	mmu-miR-34c
co	mmu-miR-351
co	mmu-miR-361
co	mmu-miR-365
co	mmu-miR-370
co	mmu-miR-377
co	mmu-miR-379
co	mmu-miR-382
co	mmu-miR-412
co	mmu-miR-422b
co	mmu-miR-423
co	mmu-miR-424
co	mmu-miR-429
co	mmu-miR-431
co	mmu-miR-450
co	mmu-miR-450b
co	mmu-miR-452
co	mmu-miR-455-5p
co	mmu-miR-484
co	mmu-miR-487b
co	mmu-miR-496
co	mmu-miR-503
co	mmu-miR-541
co	mmu-miR-652
co	mmu-miR-669a
co	mmu-miR-685
co	mmu-miR-689
co	mmu-miR-690
co	mmu-miR-706
co	mmu-miR-709
co	mmu-miR-711
co	mmu-miR-720
co	mmu-miR-9
co	mmu-miR-9*
co	mmu-miR-92
co	mmu-miR-96
co	mmu-miR-98
co	mmu-miR-99a
co	mmu-miR-99b
ves	mmu-let-7b
ves	mmu-let-7c
ves	mmu-let-7d
ves	mmu-let-7d*
ves	mmu-let-7e
ves	mmu-let-7f
ves	mmu-let-7g
ves	mmu-let-7i
ves	mmu-miR-100
ves	mmu-miR-101a
ves	mmu-miR-101b
ves	mmu-miR-103
ves	mmu-miR-106a
ves	mmu-miR-106b
ves	mmu-miR-107
ves	mmu-miR-10b
ves	mmu-miR-124a
ves	mmu-miR-125a
ves	mmu-miR-125b
ves	mmu-miR-126-3p
ves	mmu-miR-130a
ves	mmu-miR-130b
ves	mmu-miR-135b
ves	mmu-miR-137
ves	mmu-miR-140
ves	mmu-miR-140*
ves	mmu-miR-141
ves	mmu-miR-143
ves	mmu-miR-148a
ves	mmu-miR-149
ves	mmu-miR-152
ves	mmu-miR-15a
ves	mmu-miR-15b
ves	mmu-miR-16
ves	mmu-miR-17-5p
ves	mmu-miR-18
ves	mmu-miR-181a
ves	mmu-miR-181a*
ves	mmu-miR-181b
ves	mmu-miR-181d
ves	mmu-miR-182
ves	mmu-miR-183
ves	mmu-miR-185
ves	mmu-miR-190
ves	mmu-miR-191
ves	mmu-miR-193
ves	mmu-miR-195
ves	mmu-miR-199a
ves	mmu-miR-199a*
ves	mmu-miR-199b
ves	mmu-miR-19a
ves	mmu-miR-19b
ves	mmu-miR-200a
ves	mmu-miR-200b
ves	mmu-miR-200c
ves	mmu-miR-203
ves	mmu-miR-204
ves	mmu-miR-205
ves	mmu-miR-20a
ves	mmu-miR-20b
ves	mmu-miR-21
ves	mmu-miR-212
ves	mmu-miR-214
ves	mmu-miR-218
ves	mmu-miR-22
ves	mmu-miR-221
ves	mmu-miR-222
ves	mmu-miR-223
ves	mmu-miR-224
ves	mmu-miR-23a
ves	mmu-miR-23b
ves	mmu-miR-24
ves	mmu-miR-24*
ves	mmu-miR-25
ves	mmu-miR-26a
ves	mmu-miR-26b
ves	mmu-miR-27a
ves	mmu-miR-27b
ves	mmu-miR-28
ves	mmu-miR-290
ves	mmu-miR-292-5p
ves	mmu-miR-298
ves	mmu-miR-29a
ves	mmu-miR-29c
ves	mmu-miR-301
ves	mmu-miR-302c
ves	mmu-miR-30a-3p
ves	mmu-miR-30a-5p
ves	mmu-miR-30b
ves	mmu-miR-30c
ves	mmu-miR-30d
ves	mmu-miR-30e
ves	mmu-miR-30e*
ves	mmu-miR-31
ves	mmu-miR-32
ves	mmu-miR-320
ves	mmu-miR-324-5p
ves	mmu-miR-326
ves	mmu-miR-329
ves	mmu-miR-33
ves	mmu-miR-331
ves	mmu-miR-335
ves	mmu-miR-338
ves	mmu-miR-339
ves	mmu-miR-342
ves	mmu-miR-345
ves	mmu-miR-34a
ves	mmu-miR-34c
ves	mmu-miR-351
ves	mmu-miR-361
ves	mmu-miR-365
ves	mmu-miR-370
ves	mmu-miR-374-5p
ves	mmu-miR-377
ves	mmu-miR-379
ves	mmu-miR-410
ves	mmu-miR-412
ves	mmu-miR-422b
ves	mmu-miR-423
ves	mmu-miR-424
ves	mmu-miR-429
ves	mmu-miR-450
ves	mmu-miR-450b
ves	mmu-miR-455-5p
ves	mmu-miR-487b
ves	mmu-miR-496
ves	mmu-miR-500
ves	mmu-miR-503
ves	mmu-miR-542-3p
ves	mmu-miR-652
ves	mmu-miR-669a
ves	mmu-miR-685
ves	mmu-miR-689
ves	mmu-miR-690
ves	mmu-miR-691
ves	mmu-miR-706
ves	mmu-miR-709
ves	mmu-miR-711
ves	mmu-miR-720
ves	mmu-miR-9
ves	mmu-miR-92
ves	mmu-miR-93
ves	mmu-miR-96
ves	mmu-miR-98
ves	mmu-miR-99a
ves	mmu-miR-99b
Detected in co: 138
Detected in ves: 146
Detected in both: 127
