# Supplementary material for: Integration of Transcriptomics, Proteomics, and MicroRNA Analyses Reveals Novel MicroRNA Regulation of Targets in the Mammalian Inner Ear
Source: PLoS One. 2011 Apr 5;6(4):e18195. doi: 10.1371/journal.pone.0018195 (PMC3071727; doi:10.1371/journal.pone.0018195)
Supplement: Table S2 — mRNA expression profile in cochlear and vestibular sensory epithelia. (XLS) [file pone.0018195.s003.xls]

## Sheet: Sheet1
Probe	llids	Entrez Gene	symbol	mean co expression	mean ves expression	ves/co	Category
1435378_at	66528	66528	2210020M01Rik	126.672	567.684	4.48152	Up in vestibule
1419103_a_at	66082	66082	Abhd6	139.717	209.775	1.50143	Up in vestibule
1420647_a_at	16691	16691	Krt2-8	1784.12	2824.36	1.58305	Up in vestibule
1433633_at	270110	270110	Irf2bp2	61.9394	88.6848	1.4318	Up in vestibule
1428111_at	69354	69354	Slc38a4	20.7535	43.0329	2.07352	Up in vestibule
1417929_at	50934	50934	Slc7a8	75.7252	218.222	2.88176	Up in vestibule
1415758_at	72313	72313	2510002A14Rik	549.036	825.32	1.50322	Up in vestibule
1434499_a_at	16832	16832	Ldh2	5667.16	7571.54	1.33604	Up in vestibule
1434725_at	207798	207798	4921521N14Rik	341.563	679.756	1.99013	Up in vestibule
1438193_at	18191	18191	Nrxn3	58.3134	181.807	3.11776	Up in vestibule
1420641_a_at	59010	59010	Sqrdl	141.286	358.769	2.53931	Up in vestibule
1452861_at	72097	72097	2010300C02Rik	482.657	1375.43	2.8497	Up in vestibule
1424464_s_at	98682	98682	2210010L05Rik	47.6142	65.2856	1.37114	Up in vestibule
1452938_at	77531	77531	C030032C09Rik	12.909	35.3078	2.73514	Up in vestibule
1456978_s_at	107174	107174	D19Ertd652e	29.3798	453.723	15.4434	Up in vestibule
1451768_a_at	20516	20516	Slc20a2	194.986	267.825	1.37356	Up in vestibule
1428018_a_at	140497	140497	Cd300d	60.52	72.6988	1.20124	Up in vestibule
1437318_at	18481	18481	Pak3	358.289	601.608	1.67911	Up in vestibule
1459443_at	16535	16535	Kcnq1	92.2861	215.42	2.33426	Up in vestibule
1448557_at	71721	71721	1200015N20Rik	138.798	276.178	1.98978	Up in vestibule
1416405_at	12111	12111	Bgn	1020.51	1754.13	1.71887	Up in vestibule
1438147_at	109267	109267	Srcrb4d	295.188	1695.97	5.74538	Up in vestibule
1434470_at	80976	80976	Syt13	81.8778	226.409	2.7652	Up in vestibule
1451776_s_at	74318	74318	MGI:1916782	47.699	191.45	4.0137	Up in vestibule
1429909_at	74608	74608	4833411O04Rik	23.0171	85.5798	3.71809	Up in vestibule
1426734_at	224093	224093	BC022623	287.857	700.701	2.4342	Up in vestibule
1435658_at	26457	26457	Slc27a1	285.616	415.646	1.45526	Up in vestibule
1445217_at	18191	18191	Nrxn3	16.5917	26.3174	1.58618	Up in vestibule
1437675_at	20541	20541	Slc8a1	44.2711	97.9324	2.21211	Up in vestibule
1451840_at	80334	80334	Kcnip4	23.4567	51.3567	2.18942	Up in vestibule
1453159_at	71877	71877	Efhc1	190.525	536.813	2.81755	Up in vestibule
1416130_at	19122	19122	Prnp	179.789	518.514	2.88402	Up in vestibule
1424638_at	12575	12575	Cdkn1a	914.509	1619.42	1.77081	Up in vestibule
1448789_at	56847	56847	Aldh1a3	197.188	2517.69	12.768	Up in vestibule
1418253_a_at	18415	18415	Hspa4l	132.397	444.73	3.35906	Up in vestibule
1417072_at	18399	18399	Slc22a6	44.5757	66.1293	1.48353	Up in vestibule
1448029_at	21386	21386	Tbx3	32.4045	168.031	5.18543	Up in vestibule
1429181_at	75472	75472	1700009P17Rik	145.986	796.557	5.45638	Up in vestibule
1425025_at	217203	217203	0610008L10Rik	80.1654	128.937	1.60838	Up in vestibule
1440739_at	22341	22341	Vegfc	65.1623	122.103	1.87383	Up in vestibule
1434195_at	244954	244954	Prss35	273.963	763.49	2.78684	Up in vestibule
1437473_at	17132	17132	Maf	48.3852	95.0277	1.96399	Up in vestibule
1420928_at	20440	20440	St6gal1	714.243	2254.74	3.15682	Up in vestibule
1452411_at	214345	214345	Lrrc1	239.286	289.434	1.20957	Up in vestibule
1435399_at	108992	108992	2310068J10Rik	139.188	257.849	1.85252	Up in vestibule
1419320_at	56773	56773	Chst5	82.6887	1309.13	15.832	Up in vestibule
1417524_at	12794	12794	Cnih2	76.2782	130.219	1.70716	Up in vestibule
1450882_s_at	83924	83924	Tm7sf1	67.6887	135.185	1.99715	Up in vestibule
1417611_at	170706	170706	Tmem37	459.873	637.959	1.38725	Up in vestibule
1451419_at	211949	211949	Spsb4	73.5513	135.256	1.83894	Up in vestibule
1418826_at	69774	69774	Ms4a6b	101.446	318.983	3.14437	Up in vestibule
1422917_at	13835	13835	Epha1	107.192	193.612	1.80622	Up in vestibule
1418425_at	170574	170574	Sp7	42.3511	81.1147	1.91529	Up in vestibule
1418780_at	56050	56050	Cyp39a1	430.977	892.042	2.06981	Up in vestibule
1449852_a_at	98878	98878	Ehd4	187.796	362.999	1.93294	Up in vestibule
1438751_at	226781	226781	Slc30a10	25.7202	56.6569	2.20282	Up in vestibule
1420697_at	65221	65221	Slc15a3	25.0133	43.2759	1.73012	Up in vestibule
1460204_at	21682	21682	Tec	192.247	390.365	2.03054	Up in vestibule
1439426_x_at	17105	17105	Lyzs	188.457	552.892	2.93378	Up in vestibule
1444367_at	320181	320181	Fndc7	47.4294	405.046	8.53998	Up in vestibule
1439627_at	22771	22771	Zic1	26.3735	442.511	16.7786	Up in vestibule
1451362_at	226422	226422	Rab7l1	284.906	448.496	1.57419	Up in vestibule
1451805_at	83946	83946	Phip	15.2704	19.0543	1.2478	Up in vestibule
1427673_a_at	20349	20349	Sema3e	42.1518	242.309	5.74849	Up in vestibule
1433769_at	235633	235633	Als2cl	100.302	242.564	2.41833	Up in vestibule
1418074_at	20448	20448	St6galnac4	24.4471	31.4428	1.28616	Up in vestibule
1456925_at	18440	18440	P2rxl1	45.9569	64.7772	1.40952	Up in vestibule
1436122_at	384763	384763	Zfp667	497.771	774.089	1.55511	Up in vestibule
1435467_at	13998	13998	Fgd6	122.49	250.501	2.04507	Up in vestibule
1422178_a_at	19329	19329	Rab17	107.798	212.062	1.96722	Up in vestibule
1431897_at	71367	71367	Chst9	14.0224	126.014	8.98666	Up in vestibule
1431076_at	11519	11519	Add2	165.25	648.634	3.92517	Up in vestibule
1434930_at	252972	252972	Tpcn1	301.404	532.667	1.76728	Up in vestibule
1427403_at	108096	108096	Slco1a5	45.5149	97.5255	2.14271	Up in vestibule
1424568_at	70747	70747	Tspan2	304.847	500.562	1.64201	Up in vestibule
1418365_at	13036	13036	Ctsh	532.005	1782.12	3.34983	Up in vestibule
1436670_x_at	75541	75541	1700019G17Rik	149.795	256.742	1.71396	Up in vestibule
1438855_x_at	21928	21928	Tnfaip2	55.736	1819.75	32.6494	Up in vestibule
1428955_x_at	65962	65962	Slc9a3r2	178.656	305.564	1.71035	Up in vestibule
1434481_at	74026	74026	4121402D02Rik	329.526	455.379	1.38192	Up in vestibule
1429617_at	74256	74256	Cyld	94.6082	206.426	2.1819	Up in vestibule
1417071_s_at	102294	102294	Cyp4v3	220.82	590.058	2.67212	Up in vestibule
1447861_x_at	17536	17536	Mrg1	31.186	241.03	7.7288	Up in vestibule
1420394_s_at	14728	14728	Lilrb4	35.0815	76.882	2.19153	Up in vestibule
1416298_at	17395	17395	Mmp9	82.3984	719.108	8.72721	Up in vestibule
1455514_at	16506	16506	Kcnd1	89.2704	121.032	1.3558	Up in vestibule
1420597_a_at	29866	29866	Cabp2	98.8083	1270.11	12.8543	Up in vestibule
1422602_a_at	22419	22419	Wnt5b	33.5396	58.5312	1.74514	Up in vestibule
1416077_at	11535	11535	Adm	22.8855	46.5708	2.03495	Up in vestibule
1452484_at	12354	12354	Car7	34.4661	87.3259	2.53368	Up in vestibule
1419649_s_at	17913	17913	Myo1c	381.586	783.759	2.05395	Up in vestibule
1428662_a_at	74318	74318	MGI:1916782	203.358	1562.99	7.68588	Up in vestibule
1430781_at	78801	78801	Ak7	45.1782	166.105	3.67666	Up in vestibule
1436609_a_at	16976	16976	Lrpap1	5003.89	8813.44	1.76132	Up in vestibule
1425525_a_at	18438	18438	P2rx4	387.025	693.375	1.79155	Up in vestibule
1447845_s_at	22361	22361	Vnn1	14.0779	424.99	30.1884	Up in vestibule
1426105_a_at	67586	67586	Ubxd5	180.901	360.515	1.99288	Up in vestibule
1422727_at	75533	75533	Nme5	216.818	477.259	2.2012	Up in vestibule
1456096_at	319582	319582	6430573F11Rik	20.7442	60.5392	2.91837	Up in vestibule
1423569_at	67092	67092	Gatm	72.3337	146.677	2.02777	Up in vestibule
1415983_at	18826	18826	Lcp1	98.2364	370.923	3.77582	Up in vestibule
1452071_at	54403	54403	Slc4a4	94.9837	195.657	2.0599	Up in vestibule
1428434_at	72693	72693	Zcchc12	353.134	1553.78	4.39998	Up in vestibule
1424535_at	67590	67590	4930521E07Rik	233.279	292.71	1.25476	Up in vestibule
1435537_at	19266	19266	Ptprd	539.188	658.872	1.22197	Up in vestibule
1418310_a_at	19771	19771	Rlbp1	446.595	685.262	1.53442	Up in vestibule
1454745_at	214137	214137	Arhgap29	694.58	998.509	1.43757	Up in vestibule
1428454_at	192197	192197	Bcas3	236.828	380.541	1.60683	Up in vestibule
1451830_a_at	20742	20742	Spnb2	97.0627	194.093	1.99966	Up in vestibule
1427057_at	103466	103466	C630002B14Rik	717.518	1268.51	1.76791	Up in vestibule
1431119_at	69387	69387	Dnajb13	43.2465	224.948	5.20153	Up in vestibule
1438256_at	208691	208691	Eif5a2	70.2896	199.381	2.83656	Up in vestibule
1418355_at	53322	53322	Nucb2	447.945	706.947	1.5782	Up in vestibule
1433711_s_at	140742	140742	Sesn1	1579.67	2684.68	1.69952	Up in vestibule
1449335_at	21859	21859	Timp3	1262.38	2378.21	1.8839	Up in vestibule
1434037_s_at	18519	18519	Pcaf	1172.19	1999.85	1.70608	Up in vestibule
1451906_at	212190	212190	Ubxd3	63.8488	118.348	1.85356	Up in vestibule
1449470_at	13390	13390	Dlx1	30.4589	221.719	7.27929	Up in vestibule
1458193_at	18857	18857	Pmp2	159.674	1327.31	8.31261	Up in vestibule
1439014_at	239796	239796	A430031N04	368.989	494.115	1.33911	Up in vestibule
1421594_a_at	83671	83671	Sytl2	305.947	581.245	1.89982	Up in vestibule
1418643_at	66109	66109	Tspan13	2969.98	4922.09	1.65728	Up in vestibule
1419056_at	20167	20167	Rtn2	111.474	186.944	1.67702	Up in vestibule
1422943_a_at	15507	15507	Hspb1	359.337	877.931	2.44319	Up in vestibule
1439827_at	239337	239337	Adamts12	511.428	901.32	1.76236	Up in vestibule
1436029_at	83675	83675	Bicc1	406.893	695.117	1.70835	Up in vestibule
1457541_at	434756	434756	LOC434756	34.1909	200.812	5.87324	Up in vestibule
1439518_at	105450	105450	Mmrn2	15.7093	21.2211	1.35086	Up in vestibule
1452892_at	117229	117229	Stk33	16.2002	35.9473	2.21894	Up in vestibule
1416808_at	18073	18073	Nid1	1184.42	2033.38	1.71677	Up in vestibule
1457648_x_at	80752	80752	BC004044	19.8021	28.523	1.4404	Up in vestibule
1423326_at	12495	12495	Entpd1	36.023	84.473	2.34498	Up in vestibule
1421308_at	71934	71934	Car13	92.4101	174.308	1.88624	Up in vestibule
1434149_at	21413	21413	Tcf4	148.355	400.12	2.69705	Up in vestibule
1444438_at	234421	234421	Cib3	28.2548	891.923	31.5672	Up in vestibule
1416097_at	192198	192198	Lrrc4	58.6337	132.654	2.26241	Up in vestibule
1448530_at	66355	66355	Gmpr	128.482	257.373	2.00319	Up in vestibule
1455582_at	56745	56745	C1qtnf1	73.4311	230.91	3.14458	Up in vestibule
1424817_at	70997	70997	Spef1	208.103	363.758	1.74797	Up in vestibule
1434083_a_at	102506	102506	AI428506	148.09	922.31	6.22804	Up in vestibule
1429693_at	13132	13132	Dab2	142.118	348.446	2.45181	Up in vestibule
1449475_at	192113	192113	Atp12a	17.981	27.805	1.54635	Up in vestibule
1455280_at	329872	329872	Frem1	178.165	515.734	2.8947	Up in vestibule
1417195_at	52357	52357	D8Ertd594e	195.151	255.213	1.30777	Up in vestibule
1443870_at	239273	239273	Abcc4	65.1946	323.921	4.96852	Up in vestibule
1423770_at	217353	217353	Tmc6	153.388	223.637	1.45799	Up in vestibule
1455985_x_at	108037	108037	Shmt2	147.086	195.643	1.33013	Up in vestibule
1417109_at	94242	94242	Tinagl	110.695	410.626	3.70954	Up in vestibule
1435747_at	14169	14169	Fgf14	15.1409	47.7211	3.15181	Up in vestibule
1422168_a_at	12064	12064	Bdnf	55.1863	224.02	4.05934	Up in vestibule
1428604_at	112422	112422	2610305D13Rik	144.824	318.457	2.19892	Up in vestibule
1417471_s_at	52392	52392	D1Ertd622e	198.962	346.029	1.73917	Up in vestibule
1457990_at	77531	77531	C030032C09Rik	15.6135	38.7123	2.47942	Up in vestibule
1439109_at	381175	381175	MGC54896	162.479	906.182	5.57721	Up in vestibule
1448471_a_at	13024	13024	Ctla2a	69.2076	130.312	1.88292	Up in vestibule
1426235_a_at	14645	14645	Glul	281.181	532.927	1.89532	Up in vestibule
1435608_at	407821	407821	Znrf3	406.332	778.771	1.91659	Up in vestibule
1425603_at	66058	66058	0610011I04Rik	531.781	916.37	1.72321	Up in vestibule
1431422_a_at	56405	56405	Dusp14	76.1729	222.521	2.92126	Up in vestibule
1437351_at	319478	319478	Cxxc4	316.268	578.136	1.82799	Up in vestibule
1438650_x_at	14609	14609	Gja1	258.435	981.304	3.79711	Up in vestibule
1431281_at	68701	68701	Dysfip1	109.529	343.059	3.13214	Up in vestibule
1451596_a_at	20698	20698	Sphk1	277.711	452.861	1.63069	Up in vestibule
1416854_at	20531	20531	Slc34a2	37.0555	150.674	4.06616	Up in vestibule
1436926_at	26380	26380	Esrrb	49.4543	649.818	13.1398	Up in vestibule
1431980_a_at	57344	57344	As3mt	194.949	331.83	1.70214	Up in vestibule
1452843_at	16195	16195	Il6st	867.486	1292.43	1.48986	Up in vestibule
1434973_at	12354	12354	Car7	56.4483	165.087	2.92457	Up in vestibule
1455922_at	226407	226407	Rab3gap1	350.442	451.692	1.28892	Up in vestibule
1419872_at	12978	12978	Csf1r	977.353	3468.59	3.54897	Up in vestibule
1424148_a_at	106766	106766	AW049765	152.884	255.247	1.66955	Up in vestibule
1423938_at	217325	217325	Llglh2	369.1	462.022	1.25175	Up in vestibule
1443926_at	17536	17536	Mrg1	11.2894	144.183	12.7716	Up in vestibule
1454790_at	74682	74682	Wdr35	370.377	523.341	1.41299	Up in vestibule
1425518_at	56508	56508	Rapgef4	97.478	301.876	3.09687	Up in vestibule
1437950_at	212326	212326	BC035537	40.3941	62.1551	1.53872	Up in vestibule
1424716_at	67442	67442	0610039N19Rik	59.6151	85.4938	1.4341	Up in vestibule
1456061_at	243374	243374	Gimap8	42.1256	96.0749	2.28068	Up in vestibule
1431394_a_at	66725	66725	Lrrk2	64.8982	131.709	2.02946	Up in vestibule
1425993_a_at	15505	15505	Hsp105	1436.99	2465.13	1.71548	Up in vestibule
1424296_at	14629	14629	Gclc	227.253	411.106	1.80902	Up in vestibule
1425041_at	16871	16871	Lhx3	186.947	667.895	3.57265	Up in vestibule
1415861_at	22178	22178	Tyrp1	16.984	184.847	10.8836	Up in vestibule
1455324_at	433022	433022	LOC433022	198.887	702.389	3.53161	Up in vestibule
1437324_x_at	14264	14264	Fmod	129.386	453.22	3.50284	Up in vestibule
1458375_at	212390	212390	LOC212390	211.32	317.175	1.50092	Up in vestibule
1416268_at	23872	23872	Ets2	463.987	1122.94	2.4202	Up in vestibule
1429156_at	66311	66311	2610036L11Rik	25.4069	57.0434	2.24519	Up in vestibule
1446715_at	268379	268379	Abca13	13.4313	101.822	7.58092	Up in vestibule
1435750_at	320415	320415	Gchfr	43.9569	123.088	2.8002	Up in vestibule
1417751_at	20868	20868	Stk10	301.245	406.808	1.35042	Up in vestibule
1457440_at	20608	20608	Sstr4	43.1623	128.857	2.98539	Up in vestibule
1429808_at	68625	68625	1110020C03Rik	24.1831	38.2304	1.58087	Up in vestibule
1438452_at	74103	74103	Nebl	976.627	3703.8	3.79244	Up in vestibule
1449222_at	50498	50498	Ebi3	42.6693	100.607	2.35783	Up in vestibule
1443964_at	20776	20776	Tmie	210.473	335.62	1.5946	Up in vestibule
1454832_at	218194	218194	Phactr1	51.726	129.32	2.5001	Up in vestibule
1449088_at	14120	14120	Fbp2	93.5081	234.25	2.50514	Up in vestibule
1451819_at	67263	67263	Zswim6	37.7148	72.0674	1.91085	Up in vestibule
1426696_at	16976	16976	Lrpap1	1441.37	2972.36	2.06218	Up in vestibule
1460220_a_at	12977	12977	Csf1	84.6585	175.283	2.07048	Up in vestibule
1447725_at	77469	77469	C030034E14Rik	46.3067	69.1872	1.49411	Up in vestibule
1429780_at	51938	51938	D3Ertd789e	12.0046	23.0513	1.9202	Up in vestibule
1444973_at	16531	16531	Kcnma1	21.889	77.1656	3.52532	Up in vestibule
1435050_at	215821	215821	D10Bwg1379e	320.682	610.544	1.9039	Up in vestibule
1437967_at	546765	546765	LOC546765	56.5318	340.654	6.02588	Up in vestibule
1428283_at	74134	74134	Cyp2s1	37.1425	338.889	9.12401	Up in vestibule
1426906_at	226695	226695	Ifi205	22.5462	74.3652	3.29834	Up in vestibule
1450763_x_at	22415	22415	Wnt3	13.1771	98.5516	7.47901	Up in vestibule
1456711_at	320214	320214	4932425I24Rik	38.3264	196.683	5.13181	Up in vestibule
1424048_a_at	72017	72017	Nqo3a2	300.686	468.37	1.55767	Up in vestibule
1434024_at	260305	260305	Nphp4	62.1327	83.9738	1.35152	Up in vestibule
1451358_a_at	26934	26934	Racgap1	46.7439	60.0877	1.28547	Up in vestibule
1424790_at	73095	73095	2900084M01Rik	163.082	242.013	1.484	Up in vestibule
1418261_at	20963	20963	Syk	60.317	139.041	2.30518	Up in vestibule
1451932_a_at	229595	229595	Tsrc1	42.5837	63.8709	1.49989	Up in vestibule
1417299_at	18005	18005	Nek2	41.2153	143.888	3.49112	Up in vestibule
1440728_at	16531	16531	Kcnma1	26.0293	78.8674	3.02994	Up in vestibule
1450959_at	57373	57373	ICRFP703B1614Q5.6	266.25	327.036	1.2283	Up in vestibule
1453771_at	70676	70676	Gulp1	288.106	740.831	2.57138	Up in vestibule
1429459_at	108151	108151	Sema3d	223.69	913.85	4.08534	Up in vestibule
1420682_at	11443	11443	Chrnb1	193.159	482.221	2.49649	Up in vestibule
1417030_at	66950	66950	2310028N02Rik	22.3386	29.8833	1.33774	Up in vestibule
1418175_at	22337	22337	Vdr	37.4499	91.1342	2.43349	Up in vestibule
1416816_at	59125	59125	Nek7	1307.71	1740.25	1.33076	Up in vestibule
1431644_a_at	15893	15893	Ica1	38.8916	69.2003	1.77931	Up in vestibule
1422612_at	15277	15277	Hk2	254.793	609.491	2.39211	Up in vestibule
1429842_at	76668	76668	Mdh1b	27.213	101.618	3.73417	Up in vestibule
1452191_at	72461	72461	Prcp	65.9875	151.791	2.3003	Up in vestibule
1455677_s_at	12733	12733	Clcnka	127.695	323.417	2.53273	Up in vestibule
1417011_at	15529	15529	Sdc2	1427.98	2996	2.09806	Up in vestibule
1450691_at	140721	140721	Caskin2	290.909	461.655	1.58694	Up in vestibule
1443664_s_at	69655	69655	Cd164l2	167.478	264.207	1.57756	Up in vestibule
1455270_at	11488	11488	Adam11	110.65	262.534	2.37265	Up in vestibule
1439964_at	66817	66817	D8Bwg1414e	250.664	336.953	1.34424	Up in vestibule
1445723_at	11677	11677	Akr1b3	13.1539	18.5623	1.41117	Up in vestibule
1422438_at	13849	13849	Ephx1	394.171	2053.38	5.20938	Up in vestibule
1421027_a_at	17260	17260	Mef2c	31.5313	75.2206	2.38558	Up in vestibule
1451348_at	97998	97998	Depdc6	41.7825	91.0007	2.17796	Up in vestibule
1428751_at	69310	69310	Pacrg	130.869	517.073	3.95106	Up in vestibule
1448473_at	12237	12237	Bub3	306.276	992.226	3.23965	Up in vestibule
1443671_x_at	70113	70113	2010001J22Rik	36.5494	77.7609	2.12756	Up in vestibule
1416080_at	11490	11490	Adam15	82.8729	104.863	1.26534	Up in vestibule
1416084_at	22682	22682	Za20d2	168.501	252.337	1.49755	Up in vestibule
1442893_at	12386	12386	Ctnna2	61.9307	163.01	2.63214	Up in vestibule
1446048_at	12552	12552	Cdh11	319.808	553.801	1.73167	Up in vestibule
1416138_at	11750	11750	Anxa7	530.186	788.693	1.48758	Up in vestibule
1416039_x_at	16007	16007	Cyr61	139.479	233.192	1.67188	Up in vestibule
1455285_at	20529	20529	Slc31a1	51.8185	67.9859	1.312	Up in vestibule
1448883_at	19141	19141	Lgmn	451.546	1524.48	3.37613	Up in vestibule
1429177_x_at	20671	20671	Sox17	54.4443	203.438	3.73662	Up in vestibule
1418591_at	58233	58233	Dnaja4	155.688	378.773	2.43289	Up in vestibule
1419072_at	68312	68312	Gstm7	209.133	440.754	2.10753	Up in vestibule
1422887_a_at	13017	13017	Ctbp2	465.32	807.63	1.73564	Up in vestibule
1438966_x_at	14264	14264	Fmod	33.1341	124.688	3.76313	Up in vestibule
1455090_at	241308	241308	Ralgps1	411.026	711.891	1.73199	Up in vestibule
1417932_at	16173	16173	Il18	396.301	494.393	1.24752	Up in vestibule
1417793_at	54396	54396	Iigp2	118.329	229.367	1.93839	Up in vestibule
1417704_a_at	11856	11856	Arhgap6	18.8235	26.4946	1.40753	Up in vestibule
1417618_at	16425	16425	Itih2	93.3485	297.891	3.19118	Up in vestibule
1418312_at	57247	57247	Zfp276	250.15	310.021	1.23934	Up in vestibule
1435700_at	70549	70549	Tln2	133.802	337.389	2.52155	Up in vestibule
1455936_a_at	19663	19663	Rbpms	76.5431	121.979	1.5936	Up in vestibule
1455136_at	98660	98660	Atp1a2	812.61	1748.16	2.15129	Up in vestibule
1427228_at	72333	72333	2410003B16Rik	238.088	551.514	2.31642	Up in vestibule
1425832_a_at	80901	80901	Cxcr6	14.727	53.232	3.61459	Up in vestibule
1423451_at	53328	53328	Pgrmc1	4740.12	5754.58	1.21401	Up in vestibule
1441811_x_at	66058	66058	0610011I04Rik	690.132	1183.5	1.7149	Up in vestibule
1448169_at	16668	16668	Krt1-18	463.422	1237.12	2.66953	Up in vestibule
1416607_at	70984	70984	4931406C07Rik	787.167	1121.03	1.42413	Up in vestibule
1435452_at	240660	240660	Tmem20	55.8294	139.414	2.49714	Up in vestibule
1430173_x_at	70101	70101	Cyp4f16	31.1144	39.6342	1.27382	Up in vestibule
1452961_at	66873	66873	1200009O22Rik	127.523	250.658	1.9656	Up in vestibule
1442101_at	243312	243312	A930017N06Rik	16.4984	92.9123	5.63158	Up in vestibule
1455645_at	109272	109272	8030451F13Rik	698.198	1357.98	1.94497	Up in vestibule
1437060_at	380924	380924	Olfm4	17.4634	134.284	7.68943	Up in vestibule
1419647_a_at	15937	15937	Ier3	442.891	650.202	1.46809	Up in vestibule
1434131_at	216724	216724	Rufy1	228.621	320.258	1.40083	Up in vestibule
1416046_a_at	66848	66848	Fuca2	345.54	464.859	1.34531	Up in vestibule
1419758_at	18671	18671	Abcb1a	14.6663	53.7745	3.66654	Up in vestibule
1454959_s_at	14677	14677	Gnai1	626.466	1216.88	1.94246	Up in vestibule
1456883_at	216021	216021	Stox1	125.582	257.444	2.05	Up in vestibule
1450757_at	12552	12552	Cdh11	1287.96	2528.43	1.96313	Up in vestibule
1429184_at	74558	74558	Gvin1	28.5702	88.4261	3.09505	Up in vestibule
1452398_at	74055	74055	Plce1	596.828	1168.18	1.95731	Up in vestibule
1449124_at	19731	19731	Rgl1	39.6798	66.7025	1.68102	Up in vestibule
1438530_at	21788	21788	Tfpi	101.464	151.707	1.49519	Up in vestibule
1416897_at	80285	80285	Parp9	139.102	218.433	1.57031	Up in vestibule
1417426_at	19073	19073	Prg1	655.743	3053.73	4.6569	Up in vestibule
1454715_at	76897	76897	0710005M24Rik	156.99	390.595	2.48803	Up in vestibule
1453121_at	71840	71840	1700010L19Rik	24.0973	134.146	5.56685	Up in vestibule
1451507_at	17260	17260	Mef2c	28.3904	86.5331	3.04798	Up in vestibule
1422504_at	14658	14658	Glrb	265.192	625.947	2.36035	Up in vestibule
1453355_at	75607	75607	Wnk2	348.515	728.283	2.08968	Up in vestibule
1451173_at	102747	102747	Lrrc49	55.9066	116.702	2.08745	Up in vestibule
1443941_at	433886	433886	LOC433886	241.754	312.045	1.29076	Up in vestibule
1437306_at	232035	232035	C130092O11Rik	56.5068	105.084	1.85968	Up in vestibule
1429936_at	72614	72614	2700059L22Rik	40.145	119.556	2.97811	Up in vestibule
1423860_at	19215	19215	Ptgds	724.055	3225.11	4.45424	Up in vestibule
1423858_a_at	15360	15360	Hmgcs2	193.888	579.843	2.99061	Up in vestibule
1424852_at	17260	17260	Mef2c	220.299	541.974	2.46017	Up in vestibule
1425043_s_at	68394	68394	0610037D15Rik	43.2996	65.4608	1.51181	Up in vestibule
1457651_x_at	140743	140743	Rem2	55.3655	89.1056	1.60941	Up in vestibule
1431991_at	73667	73667	2410004P03Rik	39.3613	90.2631	2.29319	Up in vestibule
1449281_at	18188	18188	Nrtn	411.614	862.879	2.09633	Up in vestibule
1419470_at	14696	14696	Gnb4	522.923	724.33	1.38516	Up in vestibule
1434989_at	503691	503691	A030001O10Rik	58.7653	184.913	3.14664	Up in vestibule
1439369_x_at	65962	65962	Slc9a3r2	194.949	288.916	1.48201	Up in vestibule
1428167_a_at	68481	68481	Mpzl1	913.999	1640.66	1.79504	Up in vestibule
1436541_at	66356	66356	2310008H09Rik	116.01	199.828	1.7225	Up in vestibule
1457666_s_at	26388	26388	Ifi202b	66.9879	274.812	4.10241	Up in vestibule
1448961_at	18828	18828	Plscr2	144.114	334.408	2.32045	Up in vestibule
1439934_at	226781	226781	Slc30a10	26.3286	39.6867	1.50736	Up in vestibule
1423410_at	104362	104362	Meig1	18.9157	80.1264	4.23598	Up in vestibule
1439995_at	97086	97086	C80638	52.6395	95.4784	1.81382	Up in vestibule
1449586_at	18772	18772	Pkp1	224.08	554.607	2.47504	Up in vestibule
1456084_x_at	14264	14264	Fmod	246.375	1410.34	5.72436	Up in vestibule
1456442_at	98136	98136	NA	51.6926	116.54	2.25447	Up in vestibule
1426368_at	74030	74030	Rin2	103.698	218.906	2.11099	Up in vestibule
1423547_at	17105	17105	Lyzs	206.071	738.155	3.58205	Up in vestibule
1417097_at	26922	26922	Nrbf1	188.638	264.978	1.40469	Up in vestibule
1425977_a_at	20874	20874	Slk	78.8847	202.384	2.56557	Up in vestibule
1440370_at	268379	268379	Abca13	15.5974	141.893	9.0972	Up in vestibule
1416591_at	19376	19376	Rab34	903.124	1309.74	1.45023	Up in vestibule
1434223_at	230751	230751	1810007P19Rik	193.699	349.11	1.80233	Up in vestibule
1450875_at	14763	14763	Gpr37	424.847	1779.97	4.18966	Up in vestibule
1418326_at	20539	20539	Slc7a5	163.555	553.326	3.38313	Up in vestibule
1450379_at	17698	17698	Msn	18.4948	38.0971	2.05988	Up in vestibule
1420504_at	56774	56774	Slc6a14	91.7747	315.343	3.43605	Up in vestibule
1460241_a_at	20454	20454	St3gal5	152.289	342.01	2.24579	Up in vestibule
1446851_at	69700	69700	2310067L16Rik	95.439	125.787	1.31799	Up in vestibule
1450734_at	89867	89867	Lztr2	17.3534	38.7808	2.23477	Up in vestibule
1436103_at	216363	216363	Rab3ip	437.167	1012.54	2.31614	Up in vestibule
1435622_at	15478	15478	Hs3st3a1	33.0478	92.6732	2.80421	Up in vestibule
1455298_at	15904	15904	Id4	134.169	358.826	2.67443	Up in vestibule
1454043_a_at	16497	16497	Kcnab1	20.6779	35.6265	1.72293	Up in vestibule
1435911_s_at	353169	353169	Slc2a12	152.332	259.861	1.70589	Up in vestibule
1447585_s_at	121022	121022	Mrps6	2370.14	5092.34	2.14854	Up in vestibule
1453643_at	69315	69315	1700001L19Rik	24.6769	64.4337	2.6111	Up in vestibule
1425652_s_at	19663	19663	Rbpms	14.5144	23.5397	1.62182	Up in vestibule
1451578_at	105833	105833	4933417K04Rik	36.6133	147.546	4.02983	Up in vestibule
1460627_at	210417	210417	D130067I03Rik	77.5542	204.217	2.63322	Up in vestibule
1419088_at	21859	21859	Timp3	41.9521	91.4295	2.17938	Up in vestibule
1454768_at	382571	382571	Kcnf1	17.081	42.8319	2.50757	Up in vestibule
1449297_at	12364	12364	Casp12	51.3207	104.186	2.03009	Up in vestibule
1438133_a_at	16007	16007	Cyr61	95.9851	210.396	2.19196	Up in vestibule
1429764_at	76566	76566	1500005K14Rik	442.292	1215.26	2.74764	Up in vestibule
1444564_at	11815	11815	Apod	432.808	780.336	1.80296	Up in vestibule
1438448_at	21906	21906	Otop1	15.0685	274.553	18.2203	Up in vestibule
1424354_at	68487	68487	1110007F12Rik	36.9644	79.0628	2.13889	Up in vestibule
1417268_at	12475	12475	Cd14	95.6141	206.166	2.15623	Up in vestibule
1417374_at	20872	20872	Stk16	304.486	984.81	3.23434	Up in vestibule
1432312_a_at	71003	71003	4931440B09Rik	46.5382	65.7443	1.4127	Up in vestibule
1429891_at	75568	75568	Capsl	56.9411	276.738	4.86007	Up in vestibule
1422123_s_at	26365	26365	Ceacam1	86.2586	155.777	1.80594	Up in vestibule
1434454_at	11515	11515	Adcy9	49.6488	77.4166	1.55929	Up in vestibule
1418004_a_at	65963	65963	1810009M01Rik	3838.84	7340.85	1.91226	Up in vestibule
1433943_at	414801	414801	BC063749	84.6764	128.64	1.51919	Up in vestibule
1438763_at	216851	216851	Dnahc2	39.0765	68.0176	1.74063	Up in vestibule
1424770_at	109624	109624	Cald1	401.363	703.119	1.75183	Up in vestibule
1418509_at	12409	12409	Cbr2	152.764	538.331	3.52393	Up in vestibule
1428131_a_at	57912	57912	Cdc42se1	878.651	1388.38	1.58013	Up in vestibule
1434272_at	231207	231207	Cpeb2	463.829	653.42	1.40875	Up in vestibule
1456048_at	208922	208922	Cpeb3	43.8644	64.8955	1.47946	Up in vestibule
1424937_at	66968	66968	2310076L09Rik	37.1131	66.433	1.79002	Up in vestibule
1452299_at	107568	107568	Wwp1	450.407	549.371	1.21972	Up in vestibule
1443823_s_at	98660	98660	Atp1a2	5184.97	9042.45	1.74397	Up in vestibule
1450430_at	17533	17533	Mrc1	468.164	2317.13	4.94939	Up in vestibule
1455188_at	270190	270190	Ephb1	377.56	643.497	1.70436	Up in vestibule
1422476_at	65972	65972	Ifi30	1408.47	2701.89	1.91832	Up in vestibule
1423602_at	22029	22029	Traf1	32.0925	70.0826	2.18377	Up in vestibule
1453053_at	66311	66311	2610036L11Rik	38.0232	121.683	3.20024	Up in vestibule
1433825_at	18213	18213	Ntrk3	101.915	177.745	1.74405	Up in vestibule
1433933_s_at	101488	101488	Slco2b1	75.3381	211.245	2.80396	Up in vestibule
1445642_at	213409	213409	Lemd1	61.4468	321.158	5.22659	Up in vestibule
1423859_a_at	19215	19215	Ptgds	2026.37	7732.87	3.81612	Up in vestibule
1457632_s_at	17536	17536	Mrg1	58.5422	1073.64	18.3396	Up in vestibule
1435571_at	319742	319742	A530065I17Rik	182.193	249.381	1.36878	Up in vestibule
1415947_at	433375	433375	Creg1	488.836	836.315	1.71083	Up in vestibule
1425964_x_at	15507	15507	Hspb1	200.42	490.842	2.44907	Up in vestibule
1415996_at	56338	56338	Txnip	1917.57	4054.3	2.11429	Up in vestibule
1436593_at	380715	380715	NA	45.8717	157.347	3.43015	Up in vestibule
1453547_at	69809	69809	1810046K07Rik	21.8255	36.4052	1.66801	Up in vestibule
1435606_at	330217	330217	Gal3st4	261.359	942.916	3.60775	Up in vestibule
1435484_at	121022	121022	Mrps6	1681.33	3984.93	2.37011	Up in vestibule
1422479_at	60525	60525	Acss2	277.111	827.724	2.98698	Up in vestibule
1438861_at	242509	242509	Bnc2	26.7403	117.738	4.40299	Up in vestibule
1460467_at	69707	69707	Iqcg	25.3266	70.2076	2.77209	Up in vestibule
1439479_at	226413	226413	Lct	31.6432	83.5568	2.6406	Up in vestibule
1421307_at	71934	71934	Car13	262.979	505.296	1.92143	Up in vestibule
1448591_at	13040	13040	Ctss	622.936	1311.51	2.10537	Up in vestibule
1418283_at	12740	12740	Cldn4	140.148	314.891	2.24684	Up in vestibule
1454992_at	11987	11987	Slc7a1	242.004	444.131	1.83522	Up in vestibule
1443904_at	328035	328035	Fads6	27.0516	53.7453	1.98677	Up in vestibule
1437223_s_at	22433	22433	Xbp1	2840.13	3472.84	1.22277	Up in vestibule
1460603_at	209086	209086	Samd9l	264.536	692.967	2.61956	Up in vestibule
1429930_at	71870	71870	Ccdc19	26.5117	239.364	9.02861	Up in vestibule
1436431_at	69399	69399	1700025G04Rik	484.445	666.555	1.37591	Up in vestibule
1437093_at	69638	69638	2310040A07Rik	30.6685	135.812	4.4284	Up in vestibule
1433464_at	230673	230673	Ipo13	646.06	1067.31	1.65204	Up in vestibule
1423104_at	16367	16367	Irs1	1189.13	2737.16	2.30182	Up in vestibule
1457429_s_at	226866	226866	Gm106	206.7	2301.28	11.1334	Up in vestibule
1441137_at	83675	83675	Bicc1	255.604	473.98	1.85435	Up in vestibule
1455845_at	216881	216881	BC030477	38.3309	184.697	4.81848	Up in vestibule
1450792_at	22177	22177	Tyrobp	233.251	835.115	3.58032	Up in vestibule
1451411_at	64297	64297	Gprc5b	422.277	911.663	2.15892	Up in vestibule
1440227_at	121022	121022	Mrps6	242.794	608.345	2.5056	Up in vestibule
1424443_at	107769	107769	Tm6sf1	137.373	325.778	2.37149	Up in vestibule
1450475_at	13393	13393	Dlx3	47.989	110.637	2.30547	Up in vestibule
1433617_s_at	56336	56336	B4galt5	314.902	498.538	1.58315	Up in vestibule
1429049_at	74137	74137	Nuak2	29.6673	64.1884	2.16361	Up in vestibule
1460238_at	56047	56047	Msln	28.8012	70.0243	2.4313	Up in vestibule
1454000_s_at	75051	75051	4930578N16Rik	24.9623	41.8975	1.67843	Up in vestibule
1430640_a_at	19088	19088	Prkar2b	81.5517	202.031	2.47734	Up in vestibule
1423477_at	22771	22771	Zic1	31.7451	571.398	17.9995	Up in vestibule
1425480_at	231464	231464	Cnot6l	941.919	1156.5	1.22782	Up in vestibule
1417575_at	68149	68149	Otub2	146.715	195.983	1.3358	Up in vestibule
1448877_at	13392	13392	Dlx2	41.0781	117.482	2.85996	Up in vestibule
1436141_at	67178	67178	Zmat5	42.3084	99.7401	2.35746	Up in vestibule
1452716_at	70564	70564	5730469M10Rik	1630.23	2536.63	1.556	Up in vestibule
1425917_at	15061	15061	H28	16.789	37.7058	2.24587	Up in vestibule
1422184_a_at	11636	11636	Ak1	101.011	377.739	3.73958	Up in vestibule
1436722_a_at	11461	11461	Actb	7059.96	9168.77	1.2987	Up in vestibule
1454836_at	211986	211986	Tmem18	594.844	739.376	1.24297	Up in vestibule
1435025_at	270086	270086	4930415J21Rik	194.234	234.904	1.20938	Up in vestibule
1434634_at	546002	546002	LOC546002	132.158	246.86	1.86791	Up in vestibule
1424388_at	76779	76779	Cluap1	409.518	569.208	1.38995	Up in vestibule
1453320_at	76420	76420	1700027A23Rik	61.1133	415.674	6.80169	Up in vestibule
1422414_a_at	12314	12314	Calm2	1007.18	2443.24	2.42581	Up in vestibule
1428878_a_at	71795	71795	Pitpnc1	126.881	184.128	1.45119	Up in vestibule
1418484_at	24084	24084	Tekt2	176.047	952.582	5.41094	Up in vestibule
1416373_at	18041	18041	Nfs1	634.641	844.946	1.33138	Up in vestibule
1452231_x_at	226695	226695	Ifi205	24.2465	73.8215	3.04462	Up in vestibule
1436302_at	76775	76775	2410193C02Rik	428.528	563.018	1.31384	Up in vestibule
1456417_at	22774	22774	Zic4	26.2591	50.2185	1.91243	Up in vestibule
1429359_s_at	19663	19663	Rbpms	63.3177	128.333	2.02682	Up in vestibule
1431833_a_at	15360	15360	Hmgcs2	135.155	289.967	2.14543	Up in vestibule
1417839_at	12741	12741	Cldn5	190.225	632.098	3.32289	Up in vestibule
1438707_at	224079	224079	Atp13a4	67.155	146.598	2.18298	Up in vestibule
1418058_at	170757	170757	Eltd1	38.2365	66.3915	1.73634	Up in vestibule
1430635_at	77836	77836	Mlana	24.8144	99.575	4.01279	Up in vestibule
1427919_at	68792	68792	Srpx2	28.256	160.986	5.6974	Up in vestibule
1421546_a_at	26934	26934	Racgap1	76.4848	124.028	1.62161	Up in vestibule
1452352_at	13024	13024	Ctla2a	66.6441	171.323	2.57071	Up in vestibule
1439373_x_at	22419	22419	Wnt5b	52.6953	112.778	2.14019	Up in vestibule
1426283_at	235106	235106	MGI:2446259	77.1727	104.236	1.35069	Up in vestibule
1426084_a_at	208263	208263	Tor1aip1	98.967	144.818	1.46329	Up in vestibule
1417869_s_at	64138	64138	Ctsz	382.083	549.768	1.43887	Up in vestibule
1416402_at	56199	56199	Abcb10	132.837	167.718	1.26258	Up in vestibule
1417697_at	20652	20652	Soat1	19.8649	27.8693	1.40295	Up in vestibule
1449434_at	12350	12350	Car3	5568.64	16153.8	2.90086	Up in vestibule
1442082_at	12267	12267	C3ar1	39.1005	97.4445	2.49215	Up in vestibule
1435888_at	13649	13649	Egfr	111.148	287.628	2.58779	Up in vestibule
1436174_at	70472	70472	Atad2	170.506	218.922	1.28395	Up in vestibule
1456958_at	320784	320784	C230072F16Rik	20.5026	66.5078	3.24386	Up in vestibule
1448754_at	19659	19659	Rbp1	2353.14	4711.7	2.0023	Up in vestibule
1420672_at	16509	16509	Kcne1	30.8479	417.677	13.5399	Up in vestibule
1455737_at	78540	78540	C030002B11Rik	1284.22	2011.17	1.56606	Up in vestibule
1451287_s_at	108897	108897	2810003C17Rik	576.028	922.263	1.60107	Up in vestibule
1455558_at	228730	228730	Gm114	556.359	679.081	1.22058	Up in vestibule
1437718_x_at	14264	14264	Fmod	103.128	449.766	4.36125	Up in vestibule
1430688_s_at	77996	77996	D730039F16Rik	39.6504	73.5903	1.85598	Up in vestibule
1440797_at	320038	320038	Dlx6os1	100.786	155.44	1.54228	Up in vestibule
1448339_at	69981	69981	Tmem30a	641.605	819.026	1.27653	Up in vestibule
1434148_at	21413	21413	Tcf4	638.116	1406.46	2.20408	Up in vestibule
1444034_at	56508	56508	Rapgef4	22.5121	49.4911	2.19842	Up in vestibule
1436568_at	67374	67374	Jam2	312.738	625.104	1.99881	Up in vestibule
1427061_at	225182	225182	Rbbp8	801.617	1494.88	1.86483	Up in vestibule
1460598_at	242700	242700	Il28ra	142.527	184.962	1.29773	Up in vestibule
1423909_at	66058	66058	0610011I04Rik	879.364	1772.14	2.01526	Up in vestibule
1428739_at	69638	69638	2310040A07Rik	581.882	1073.06	1.84413	Up in vestibule
1427395_a_at	56847	56847	Aldh1a3	107.373	261.041	2.43117	Up in vestibule
1433768_at	72333	72333	2410003B16Rik	190.543	471.281	2.47336	Up in vestibule
1437094_x_at	69638	69638	2310040A07Rik	40.1431	167.37	4.16933	Up in vestibule
1419298_at	269823	269823	Pon3	29.3102	56.4477	1.92587	Up in vestibule
1429324_at	71836	71836	1700012A16Rik	35.4861	62.6226	1.76471	Up in vestibule
1416468_at	11668	11668	Aldh1a1	1306.98	6663.94	5.09874	Up in vestibule
1422124_a_at	19264	19264	Ptprc	63.2337	189.24	2.9927	Up in vestibule
1438030_at	240168	240168	Rasgrp3	71.3676	146.561	2.05361	Up in vestibule
1429851_at	69329	69329	1700003M02Rik	67.5341	346.806	5.13527	Up in vestibule
1451161_a_at	13733	13733	Emr1	108.894	329.156	3.02272	Up in vestibule
1438945_x_at	14609	14609	Gja1	200.028	957.146	4.78506	Up in vestibule
1451122_at	319554	319554	Idi1	687.084	940.64	1.36903	Up in vestibule
1443824_s_at	12354	12354	Car7	115.555	736.156	6.3706	Up in vestibule
1420941_at	19737	19737	Rgs5	204.823	481.991	2.35321	Up in vestibule
1455913_x_at	22139	22139	Ttr	2517.48	5053.59	2.0074	Up in vestibule
1418456_a_at	57266	57266	Cxcl14	67.4364	641.653	9.51494	Up in vestibule
1422782_s_at	142980	142980	Tlr3	244.244	511.04	2.09233	Up in vestibule
1428223_at	76574	76574	Mfsd2	356.084	558.134	1.56743	Up in vestibule
1429663_at	71206	71206	3110023G01Rik	29.8464	69.8112	2.33901	Up in vestibule
1427797_s_at	13034	13034	Ctse	16.6123	24.6371	1.48306	Up in vestibule
1452776_a_at	53312	53312	6330412F12Rik	160.051	198.709	1.24154	Up in vestibule
1418704_at	20196	20196	S100a13	273.103	661.052	2.42053	Up in vestibule
1427038_at	18619	18619	Penk1	332.785	1334.83	4.01109	Up in vestibule
1437079_at	214084	214084	Slc18a2	11.6009	48.5692	4.18666	Up in vestibule
1420649_at	11906	11906	Atbf1	509.551	683.303	1.34099	Up in vestibule
1455554_at	268723	268723	A830039N20Rik	69.1789	191.895	2.7739	Up in vestibule
1450652_at	13038	13038	Ctsk	524.512	1886.12	3.59596	Up in vestibule
1436340_at	100223	100223	9630041G16Rik	128.336	319.676	2.49093	Up in vestibule
1418153_at	16772	16772	Lama1	39.0239	214.365	5.49317	Up in vestibule
1448860_at	140743	140743	Rem2	156.247	251.2	1.60771	Up in vestibule
1456321_at	70701	70701	3830408G10Rik	43.8529	95.6752	2.18173	Up in vestibule
1419144_at	93671	93671	Cd163	31.8905	141.915	4.45008	Up in vestibule
1427044_a_at	218038	218038	Amph	500.616	955.514	1.90868	Up in vestibule
1419017_at	53419	53419	Corin	142.2	678.539	4.77171	Up in vestibule
1436221_at	27877	27877	D1Ertd471e	29.6293	150.195	5.06913	Up in vestibule
1422587_at	56277	56277	Tmem45a	326.957	890.62	2.72397	Up in vestibule
1434329_s_at	68465	68465	Adipor2	1310.02	2348.22	1.79251	Up in vestibule
1453432_at	75784	75784	4930428O21Rik	25.3032	74.8355	2.95755	Up in vestibule
1422619_at	19012	19012	Ppap2a	884.477	1439.9	1.62797	Up in vestibule
1444905_at	51940	51940	D1Ertd705e	26.7479	80.6969	3.01695	Up in vestibule
1450001_a_at	72088	72088	Ush1c	686.28	2023.98	2.94921	Up in vestibule
1445576_at	75136	75136	4930526H21Rik	23.8237	144.484	6.0647	Up in vestibule
1434957_at	57810	57810	Cdon	1423.43	3767.23	2.64659	Up in vestibule
1434537_at	108116	108116	Slco3a1	239.799	381.914	1.59264	Up in vestibule
1434096_at	54403	54403	Slc4a4	203.198	703.406	3.46167	Up in vestibule
1435062_at	68955	68955	1500001A10Rik	30.0524	42.8899	1.42717	Up in vestibule
1449091_at	54420	54420	Cldn8	754.342	2932.06	3.8869	Up in vestibule
1418589_a_at	17349	17349	Mlf1	133.679	743.713	5.56343	Up in vestibule
1425133_s_at	74760	74760	Rab3il1	170.908	260.752	1.52569	Up in vestibule
1418091_at	81879	81879	Tcfcp2l1	76.4046	165.678	2.16843	Up in vestibule
1427115_at	17883	17883	Myh3	14.9018	19.0718	1.27983	Up in vestibule
1452936_at	72832	72832	Crtac1	31.8297	207.3	6.51278	Up in vestibule
1418204_s_at	11629	11629	Aif1	47.6318	94.3936	1.98173	Up in vestibule
1448265_x_at	14012	14012	Eva1	971.081	1442.75	1.48572	Up in vestibule
1424613_at	64297	64297	Gprc5b	352.167	1242.94	3.52941	Up in vestibule
1443694_at	58175	58175	Rgs20	27.9093	76.3504	2.73567	Up in vestibule
1452204_at	224650	224650	Anks1	448.677	795.167	1.77225	Up in vestibule
1428803_at	217700	217700	4632408A20Rik	97.0152	147.376	1.5191	Up in vestibule
1457032_at	99657	99657	6430567E01Rik	44.1087	91.7995	2.08121	Up in vestibule
1448566_at	53945	53945	Slc40a1	50.6703	201.451	3.97571	Up in vestibule
1430646_at	78818	78818	5830407P18Rik	90.7835	120.656	1.32906	Up in vestibule
1431751_a_at	77015	77015	2700082O15Rik	218.987	430.529	1.966	Up in vestibule
1453766_a_at	77627	77627	4931407K02Rik	32.37	91.2306	2.81837	Up in vestibule
1436861_at	16196	16196	Il7	16.5297	22.1242	1.33845	Up in vestibule
1451611_at	225845	225845	Hrasls3	186.519	308.58	1.65441	Up in vestibule
1417749_a_at	21872	21872	Tjp1	2806.84	4303.73	1.5333	Up in vestibule
1455462_at	210044	210044	Adcy2	390.962	1072.82	2.74406	Up in vestibule
1434528_at	239435	239435	Aard	419.748	637.895	1.51971	Up in vestibule
1429321_at	67702	67702	Rnf149	1207.06	7059.77	5.84875	Up in vestibule
1456766_at	77609	77609	C330001K17Rik	53.9824	206.251	3.82071	Up in vestibule
1429052_at	19266	19266	Ptprd	1300.92	1631.85	1.25438	Up in vestibule
1417061_at	53945	53945	Slc40a1	252.302	981.242	3.88915	Up in vestibule
1449858_at	12524	12524	Cd86	21.9083	59.9279	2.73539	Up in vestibule
1437579_at	18005	18005	Nek2	18.9306	35.915	1.89719	Up in vestibule
1423516_a_at	18074	18074	Nid2	204.62	670.401	3.27633	Up in vestibule
1433639_at	215512	215512	5730593F17Rik	422.36	556.906	1.31856	Up in vestibule
1420170_at	17886	17886	Myh9	91.0904	135.477	1.48728	Up in vestibule
1451372_a_at	11870	11870	Art1	45.4961	237.084	5.21109	Up in vestibule
1454608_x_at	22139	22139	Ttr	5814.72	11750.6	2.02084	Up in vestibule
1418186_at	14871	14871	Gstt1	283.369	581.694	2.05278	Up in vestibule
1435292_at	210789	210789	Tbc1d4	75.7196	182.017	2.40383	Up in vestibule
1449740_s_at	13511	13511	Dsg2	324.649	544.326	1.67666	Up in vestibule
1421844_at	16180	16180	Il1rap	84.3806	128.817	1.52662	Up in vestibule
1423077_at	66616	66616	Snx9	125.616	192.765	1.53456	Up in vestibule
1423584_at	231329	231329	Polr2b	318.289	1341.35	4.21427	Up in vestibule
1418110_a_at	16331	16331	Inpp5d	65.514	88.9756	1.35812	Up in vestibule
1424315_at	68001	68001	1110004E09Rik	292.128	534.79	1.83067	Up in vestibule
1450387_s_at	11639	11639	Ak3l1	138.406	173.893	1.2564	Up in vestibule
1426231_at	74199	74199	Vit	33.8332	656.952	19.4174	Up in vestibule
1455515_at	72301	72301	1810041L15Rik	283.735	648.722	2.28637	Up in vestibule
1456133_x_at	16419	16419	Itgb5	1324.54	2168.64	1.63727	Up in vestibule
1429185_at	108788	108788	4631416L12Rik	308.284	1282.42	4.15986	Up in vestibule
1429313_at	26563	26563	Ror1	181.079	681.317	3.76254	Up in vestibule
1423037_at	23796	23796	Agtrl1	49.3597	70.5589	1.42948	Up in vestibule
1442143_at	320091	320091	Tmem16d	168.571	608.315	3.60865	Up in vestibule
1452303_at	234094	234094	Arhgef10	85.2916	145.355	1.70421	Up in vestibule
1417679_at	14581	14581	Gfi1	241.437	2081.71	8.62217	Up in vestibule
1429798_s_at	67272	67272	Cklfsf5	221.075	347.994	1.57409	Up in vestibule
1428781_at	73712	73712	1110014F24Rik	14.0508	67.1587	4.77971	Up in vestibule
1441708_at	66722	66722	Spag16	20.2973	72.9383	3.5935	Up in vestibule
1447584_s_at	68632	68632	Myct1	17.1578	24.9833	1.45609	Up in vestibule
1439880_at	98303	98303	D630023F18Rik	21.027	121.438	5.77532	Up in vestibule
1418213_at	94179	94179	Krt1-23	47.1675	209.314	4.43768	Up in vestibule
1427465_at	98660	98660	Atp1a2	477.222	815.883	1.70965	Up in vestibule
1422541_at	19274	19274	Ptprm	275.3	575.102	2.089	Up in vestibule
1452227_at	231238	231238	2310045A20Rik	504.536	1481.36	2.93608	Up in vestibule
1428638_at	74405	74405	Efhc2	77.9253	140.558	1.80375	Up in vestibule
1423836_at	218820	218820	Zfp503	67.7162	106.24	1.5689	Up in vestibule
1425400_a_at	56222	56222	Cited4	145.584	514.645	3.53503	Up in vestibule
1416513_at	16779	16779	Lamb2	489.625	974.73	1.99077	Up in vestibule
1442067_at	26563	26563	Ror1	50.0666	212.988	4.2541	Up in vestibule
1437886_at	239743	239743	Klhl6	53.6817	115.389	2.1495	Up in vestibule
1438878_at	13640	13640	Efna5	139.329	355.414	2.55089	Up in vestibule
1449164_at	12514	12514	Cd68	98.2241	399.519	4.06742	Up in vestibule
1431056_a_at	16956	16956	Lpl	18.8632	41.9001	2.22127	Up in vestibule
1418725_at	66326	66326	Dnajc5b	45.8151	643.596	14.0477	Up in vestibule
1449198_a_at	20454	20454	St3gal5	956.462	1853.12	1.93747	Up in vestibule
1435196_at	18212	18212	Ntrk2	204.629	480.685	2.34905	Up in vestibule
1419289_a_at	20972	20972	Syngr1	216.9	466.793	2.15211	Up in vestibule
1434460_at	102774	102774	Bbs4	59.5481	92.8995	1.56007	Up in vestibule
1421225_a_at	54403	54403	Slc4a4	17.491	35.4313	2.02568	Up in vestibule
1424754_at	109225	109225	Ms4a7	116.606	416.332	3.57042	Up in vestibule
1444163_at	330721	330721	Nek5	24.9232	61.4478	2.46549	Up in vestibule
1417765_a_at	11722	11722	Amy1	34.2912	98.7258	2.87904	Up in vestibule
1434893_at	98660	98660	Atp1a2	187.728	432.519	2.30397	Up in vestibule
1457358_at	17536	17536	Mrg1	23.4473	105.561	4.50207	Up in vestibule
1436225_at	28240	28240	Trpm2	73.7043	103.9	1.40969	Up in vestibule
1429074_at	75556	75556	1700026D08Rik	21.9472	449.027	20.4594	Up in vestibule
1424410_at	76260	76260	Ttc8	494.009	603.222	1.22108	Up in vestibule
1455000_at	238377	238377	Gpr68	24.9681	41.4017	1.65818	Up in vestibule
1451174_at	224109	224109	Lrrc33	75.154	222.846	2.96519	Up in vestibule
1448503_at	17210	17210	Mcl1	1126.62	1487.62	1.32044	Up in vestibule
1455215_at	319352	319352	C530028O21Rik	137.932	181.001	1.31225	Up in vestibule
1424932_at	13649	13649	Egfr	163.779	455.519	2.7813	Up in vestibule
1423856_at	319195	319195	Rpl17	73.7375	138.354	1.8763	Up in vestibule
1417381_at	12259	12259	C1qa	167.269	449.523	2.68743	Up in vestibule
1444769_at	21778	21778	Tex9	12.869	31.8672	2.47628	Up in vestibule
1418953_at	50759	50759	Fbxo16	90.8021	132.998	1.46471	Up in vestibule
1456772_at	17969	17969	Ncf1	59.742	129.523	2.16804	Up in vestibule
1457423_at	268777	268777	A930012M17	769.793	1130.17	1.46815	Up in vestibule
1449254_at	20750	20750	Spp1	1296.47	9420.69	7.26642	Up in vestibule
1450956_at	30049	30049	Scd3	26.9188	52.3623	1.9452	Up in vestibule
1437992_x_at	14609	14609	Gja1	577.97	2834.3	4.90388	Up in vestibule
1417273_at	27273	27273	Pdk4	65.578	155.117	2.36538	Up in vestibule
1449228_at	20404	20404	Sh3gl2	25.7671	34.1821	1.32658	Up in vestibule
1448688_at	27205	27205	Podxl	430.536	1888.57	4.38655	Up in vestibule
1454961_at	104015	104015	Synj1	819.456	1160.28	1.41591	Up in vestibule
1448529_at	21824	21824	Thbd	64.0237	433.915	6.77741	Up in vestibule
1438902_a_at	71006	71006	4932703K07Rik	3777.1	4599.36	1.2177	Up in vestibule
1452001_at	18022	18022	Nfe2	106.897	307.154	2.87335	Up in vestibule
1416236_a_at	14012	14012	Eva1	1294.54	1634.82	1.26286	Up in vestibule
1436075_at	54612	54612	Sfrp5	63.0333	1933.01	30.6664	Up in vestibule
1423726_at	26949	26949	Vat1	86.7267	125.663	1.44895	Up in vestibule
1448891_at	80891	80891	Msr2	219.422	752.77	3.4307	Up in vestibule
1457401_at	237806	237806	Dnahc9	39.3904	131.796	3.34589	Up in vestibule
1435287_at	11519	11519	Add2	21.317	56.424	2.6469	Up in vestibule
1415864_at	12183	12183	Bpgm	396.294	594.522	1.5002	Up in vestibule
1430620_at	75860	75860	4930588N13Rik	50.5677	90.9779	1.79913	Up in vestibule
1419735_at	12994	12994	Csnk	21.6373	150.623	6.96126	Up in vestibule
1421943_at	21802	21802	Tgfa	235.737	467.46	1.98297	Up in vestibule
1433465_a_at	101602	101602	AI467606	27.6176	104.13	3.77044	Up in vestibule
1429249_at	75769	75769	4833424O15Rik	29.8138	70.2488	2.35625	Up in vestibule
1444409_at	380714	380714	Rph3al	375.468	654.662	1.74359	Up in vestibule
1422704_at	14933	14933	Gyk	120.829	190.044	1.57283	Up in vestibule
1421855_at	14190	14190	Fgl2	13.9038	23.6492	1.70091	Up in vestibule
1426301_at	11658	11658	Alcam	136.556	279.797	2.04895	Up in vestibule
1416825_at	20648	20648	Snta1	201.318	347.187	1.72456	Up in vestibule
1418412_at	21987	21987	Tpd52l1	486.409	920.483	1.8924	Up in vestibule
1453586_at	12495	12495	Entpd1	35.9188	86.3435	2.40385	Up in vestibule
1417485_at	15891	15891	Ibsp	27.3799	204.953	7.48553	Up in vestibule
1418176_at	22337	22337	Vdr	38.2259	126.662	3.31351	Up in vestibule
1421694_a_at	13003	13003	Cspg2	68.9265	190.806	2.76826	Up in vestibule
1417633_at	20657	20657	Sod3	40.6248	663.332	16.3283	Up in vestibule
1460632_at	98711	98711	Rdh10	443.091	1754.9	3.96058	Up in vestibule
1454831_at	14236	14236	Foxn2	220.721	370.853	1.68019	Up in vestibule
1451744_a_at	77219	77219	Zadh1	98.3393	140.694	1.4307	Up in vestibule
1436618_at	94282	94282	Sfxn5	449.477	956.351	2.1277	Up in vestibule
1435462_at	433022	433022	LOC433022	17.886	29.957	1.67488	Up in vestibule
1437685_x_at	14264	14264	Fmod	104.89	451.78	4.30718	Up in vestibule
1434196_at	58233	58233	Dnaja4	277.059	801.782	2.8939	Up in vestibule
1429055_at	71653	71653	4930506M07Rik	485.587	1699.27	3.49942	Up in vestibule
1430118_at	78449	78449	2700046A07Rik	40.7027	104.113	2.55789	Up in vestibule
1419665_a_at	56312	56312	Nupr1	265.782	686.656	2.58353	Up in vestibule
1436334_at	104015	104015	Synj1	201.546	338.41	1.67907	Up in vestibule
1433999_at	20874	20874	Slk	584.049	1315.42	2.25224	Up in vestibule
1448291_at	17395	17395	Mmp9	49.1437	426.458	8.67778	Up in vestibule
1434735_at	217082	217082	Hlf	373.143	839.19	2.24897	Up in vestibule
1449464_at	16535	16535	Kcnq1	131.93	579.32	4.39112	Up in vestibule
1428485_at	76459	76459	Car12	181.261	1081.29	5.96538	Up in vestibule
1420650_at	11906	11906	Atbf1	254.34	399.419	1.57041	Up in vestibule
1418057_at	21844	21844	Tiam1	231.142	512.4	2.21682	Up in vestibule
1425906_a_at	20349	20349	Sema3e	16.1602	47.713	2.9525	Up in vestibule
1418910_at	12162	12162	Bmp7	305.836	464.063	1.51736	Up in vestibule
1437580_s_at	18005	18005	Nek2	68.5622	632.595	9.22659	Up in vestibule
1418183_a_at	19157	19157	Pscd1	514.376	646.754	1.25736	Up in vestibule
1424271_at	13175	13175	Dcamkl1	1341.08	2222.88	1.65753	Up in vestibule
1426082_a_at	229699	229699	Slc16a4	24.5214	48.4207	1.97463	Up in vestibule
1428455_at	12818	12818	Col14a1	355.245	1115.93	3.14129	Up in vestibule
1449078_at	54613	54613	St3gal6	81.7349	162.125	1.98355	Up in vestibule
1423669_at	12842	12842	Col1a1	84.7013	312.148	3.68528	Up in vestibule
1422150_at	15373	15373	Hmx3	25.4814	72.4223	2.84216	Up in vestibule
1429206_at	69288	69288	Rhobtb1	199.766	379.554	1.89999	Up in vestibule
1442116_at	381413	381413	Gm1012	41.4882	149.159	3.5952	Up in vestibule
1416855_at	14451	14451	Gas1	3636.98	6489.77	1.78438	Up in vestibule
1436538_at	67620	67620	Lrp2bp	73.7315	124.677	1.69096	Up in vestibule
1428786_at	105855	105855	Nckap1l	55.4003	105.611	1.90632	Up in vestibule
1428948_at	16531	16531	Kcnma1	25.8322	118.236	4.5771	Up in vestibule
1419717_at	20349	20349	Sema3e	57.9178	451.819	7.80104	Up in vestibule
1417281_a_at	26561	26561	Mmp23	84.4051	166.284	1.97007	Up in vestibule
1417133_at	18858	18858	Pmp22	2269.84	7820.78	3.44552	Up in vestibule
1445173_at	234915	234915	AK129341	61.9393	129.877	2.09685	Up in vestibule
1432466_a_at	11816	11816	Apoe	3342.67	5793.05	1.73306	Up in vestibule
1449971_a_at	69142	69142	1810029C22Rik	94.187	245.332	2.60473	Up in vestibule
1424701_at	219257	219257	Pcdh20	186.268	1838.62	9.87082	Up in vestibule
1425658_at	235505	235505	Cd109	17.5446	25.9489	1.47903	Up in vestibule
1437405_a_at	16010	16010	Igfbp4	6345.95	9915.36	1.56247	Up in vestibule
1424220_a_at	53627	53627	Porcn	198.604	281.08	1.41528	Up in vestibule
1449823_at	93837	93837	Dach2	154.484	383.357	2.48153	Up in vestibule
1434500_at	117160	117160	Ttyh2	213.12	315.778	1.48169	Up in vestibule
1437682_x_at	68001	68001	1110004E09Rik	201.698	287.233	1.42407	Up in vestibule
1435327_at	98667	98667	AW112037	239.263	449.633	1.87924	Up in vestibule
1446748_at	69849	69849	2010007H06Rik	40.489	162.973	4.02513	Up in vestibule
1449191_at	192200	192200	Wfdc12	75.7382	111.384	1.47064	Up in vestibule
1435338_at	12571	12571	Cdk6	313.853	487.786	1.55419	Up in vestibule
1440201_at	106755	106755	AV344025	37.1457	119.473	3.21634	Up in vestibule
1460180_at	15212	15212	Hexb	435.059	920.858	2.11663	Up in vestibule
1426621_a_at	72930	72930	Ppp2r2b	306.223	770.586	2.51642	Up in vestibule
1418934_at	23937	23937	Mab21l2	45.3573	72.8381	1.60587	Up in vestibule
1417815_a_at	26943	26943	Tde1	858.922	1517.78	1.76708	Up in vestibule
1416383_a_at	18563	18563	Pcx	110.798	278.134	2.51027	Up in vestibule
1428357_at	72148	72148	2610019F03Rik	213.636	458.058	2.1441	Up in vestibule
1448470_at	14121	14121	Fbp1	41.7358	83.115	1.99146	Up in vestibule
1454606_at	217684	217684	4933426M11Rik	222.538	354.213	1.59169	Up in vestibule
1441223_at	381270	381270	38047	72.4036	106.002	1.46404	Up in vestibule
1440085_at	245527	245527	Eda2r	18.9249	32.9613	1.74169	Up in vestibule
1449620_s_at	28001	28001	D16Wsu65e	54.423	105.661	1.94148	Up in vestibule
1439954_at	399595	399595	6430514M23Rik	84.4502	207.929	2.46215	Up in vestibule
1426880_at	208618	208618	BC026657	356.314	646.599	1.81469	Up in vestibule
1420797_at	18419	18419	Otog	2960.57	8337.93	2.81632	Up in vestibule
1438122_at	104776	104776	Aldh6a1	26.5849	80.4672	3.0268	Up in vestibule
1448433_a_at	18542	18542	Pcolce	368.873	747.572	2.02664	Up in vestibule
1435184_at	319900	319900	B430320C24Rik	153.478	264.929	1.72617	Up in vestibule
1428958_at	74229	74229	Paqr8	232.288	458.71	1.97474	Up in vestibule
1434306_at	216363	216363	Rab3ip	374.139	749.736	2.00389	Up in vestibule
1449203_at	108096	108096	Slco1a5	403.355	952.983	2.36264	Up in vestibule
1419693_at	140792	140792	Colec12	335.931	1136.17	3.38215	Up in vestibule
1416271_at	64058	64058	Perp	451.423	1114.25	2.4683	Up in vestibule
1416003_at	18417	18417	Cldn11	424.512	1169.83	2.75571	Up in vestibule
1425746_at	77996	77996	D730039F16Rik	46.5339	166.606	3.58032	Up in vestibule
1416053_at	16979	16979	Lrrn1	588.416	1792.59	3.04647	Up in vestibule
1449379_at	16542	16542	Kdr	133.617	1046.76	7.83407	Up in vestibule
1454926_at	77629	77629	4930544G21Rik	60.8218	654.004	10.7528	Up in vestibule
1440803_x_at	21338	21338	Tacr3	47.486	950.869	20.0242	Up in vestibule
1450883_a_at	12491	12491	Cd36	24.279	84.3609	3.47464	Up in vestibule
1451783_a_at	16579	16579	Kifap3	1274.41	2212.78	1.73631	Up in vestibule
1430353_at	226075	226075	Glis3	77.0569	189.591	2.4604	Up in vestibule
1450112_a_at	14453	14453	Gas2	2706.45	5561.82	2.05502	Up in vestibule
1417542_at	20112	20112	Rps6ka2	872.1	1344.89	1.54213	Up in vestibule
1438206_a_at	66460	66460	2610042O14Rik	645.325	847.631	1.31349	Up in vestibule
1456046_at	17064	17064	C1qr1	45.024	138.102	3.06731	Up in vestibule
1454011_a_at	19891	19891	Rpa2	35.7262	49.9112	1.39705	Up in vestibule
1436239_at	114479	114479	Slc5a5	21.4828	28.9215	1.34626	Up in vestibule
1419054_a_at	24000	24000	Ptpn21	198.022	309.78	1.56437	Up in vestibule
1421657_a_at	20671	20671	Sox17	30.4453	74.4979	2.44695	Up in vestibule
1449481_at	50799	50799	Slc25a13	125.227	234.088	1.86932	Up in vestibule
1435832_at	192198	192198	Lrrc4	42.5302	71.7931	1.68805	Up in vestibule
1448890_at	16598	16598	Klf2	82.3009	271.141	3.2945	Up in vestibule
1436504_x_at	11808	11808	Apoa4	159.7	619.382	3.87841	Up in vestibule
1423611_at	11647	11647	Akp2	52.8385	123.375	2.33493	Up in vestibule
1434645_at	320827	320827	C530008M17Rik	277.564	401.898	1.44795	Up in vestibule
1419605_at	17312	17312	Mgl1	70.5078	174.005	2.46789	Up in vestibule
1433924_at	18616	18616	Peg3	2183.09	3229.91	1.47951	Up in vestibule
1455009_at	12874	12874	Cpd	692.592	1462.73	2.11196	Up in vestibule
1439341_at	381157	381157	AK220484	232.862	341.732	1.46753	Up in vestibule
1440156_s_at	99101	99101	AI851523	425.906	970.383	2.2784	Up in vestibule
1434362_at	98715	98715	AW550831	101.233	214.998	2.12378	Up in vestibule
1457784_at	56365	56365	Clcnkb	65.2212	114.541	1.75619	Up in vestibule
1424909_at	69297	69297	Lrrc46	76.3835	175.563	2.29844	Up in vestibule
1455607_at	72780	72780	Thsd2	147.267	2142.24	14.5466	Up in vestibule
1426431_at	16450	16450	Jag2	92.9007	144.724	1.55783	Up in vestibule
1460239_at	66109	66109	Tspan13	1158.81	2348.3	2.02648	Up in vestibule
1438729_at	20664	20664	Sox1	12.0711	157.661	13.061	Up in vestibule
1452284_at	19283	19283	Ptprz1	1199.82	1874.69	1.56248	Up in vestibule
1456137_at	18191	18191	Nrxn3	66.7189	178.132	2.66989	Up in vestibule
1417300_at	100340	100340	Smpdl3b	42.5492	104.501	2.456	Up in vestibule
1452841_at	70974	70974	Pgm2l1	475.807	1133.44	2.38215	Up in vestibule
1441306_at	228778	228778	6820408C15Rik	37.1845	46.9171	1.26174	Up in vestibule
1426236_a_at	14645	14645	Glul	2060.26	3195.41	1.55098	Up in vestibule
1456014_s_at	107328	107328	Tpt1h	48.276	134.915	2.79465	Up in vestibule
1457092_at	320265	320265	C630007B19Rik	93.2414	179.731	1.92759	Up in vestibule
1426606_at	72832	72832	Crtac1	90.3716	608.615	6.73458	Up in vestibule
1442903_at	21413	21413	Tcf4	46.4863	168.741	3.62991	Up in vestibule
1455304_at	52304	52304	D9Ertd414e	88.2532	200.182	2.26827	Up in vestibule
1437466_at	11658	11658	Alcam	250.637	512.252	2.0438	Up in vestibule
1435365_at	320869	320869	4732415M23Rik	53.0538	78.1528	1.47309	Up in vestibule
1449046_a_at	66124	66124	1110007C05Rik	306.624	484.81	1.58112	Up in vestibule
1437966_at	210673	210673	B230206N24Rik	28.6382	66.4571	2.32057	Up in vestibule
1434126_at	228602	228602	4930402H24Rik	239.971	355.424	1.48111	Up in vestibule
1441214_at	320051	320051	MGI:2443248	128.878	201.955	1.56702	Up in vestibule
1423126_at	11933	11933	Atp1b3	1613.6	3049.47	1.88985	Up in vestibule
1447762_x_at	76459	76459	Car12	38.7268	56.5614	1.46052	Up in vestibule
1456611_at	58909	58909	D430015B01Rik	94.6906	236.524	2.49786	Up in vestibule
1452759_s_at	67533	67533	Ppfibp1	664.942	1037.16	1.55978	Up in vestibule
1417889_at	11811	11811	Apobec2	36.8189	90.2715	2.45177	Up in vestibule
1455550_x_at	26943	26943	Tde1	2059.04	3318.95	1.61189	Up in vestibule
1445787_at	75973	75973	5033413D22Rik	35.9125	71.49	1.99067	Up in vestibule
1415948_at	433375	433375	Creg1	272.575	560.184	2.05516	Up in vestibule
1441909_s_at	214112	214112	9530066K23Rik	11.7991	30.77	2.60783	Up in vestibule
1459646_at	328779	328779	Hs3st6	290.995	391.19	1.34432	Up in vestibule
1429422_at	71086	71086	4933412E12Rik	33.7292	44.3279	1.31423	Up in vestibule
1420395_a_at	16578	16578	Kif9	71.0051	332.034	4.6762	Up in vestibule
1448460_at	11477	11477	Acvr1	614.289	959.878	1.56258	Up in vestibule
1421482_at	140475	140475	Bsnd	41.0683	197.584	4.8111	Up in vestibule
1423153_x_at	12628	12628	Cfh	32.074	211.593	6.59702	Up in vestibule
1433040_at	72943	72943	2900018E21Rik	44.4602	122.097	2.74621	Up in vestibule
1455807_at	239364	239364	Tspyl5	154.241	316.273	2.05051	Up in vestibule
1419527_at	12845	12845	Comp	32.7451	46.1629	1.40977	Up in vestibule
1429527_a_at	22038	22038	Plscr1	86.093	174.664	2.02878	Up in vestibule
1436617_at	207175	207175	Cetn4	321.291	534.591	1.66388	Up in vestibule
1426353_at	20852	20852	Stat6	205.843	307.016	1.49151	Up in vestibule
1448323_a_at	12111	12111	Bgn	1026.63	1712.47	1.66804	Up in vestibule
1439618_at	23984	23984	Pde10a	22.4858	44.4865	1.97842	Up in vestibule
1419182_at	64817	64817	Svep1	179.28	345.831	1.92901	Up in vestibule
1435326_at	98667	98667	AW112037	547.968	1233.54	2.25112	Up in vestibule
1451431_a_at	52840	52840	D2Bwg0891e	235.524	359.074	1.52457	Up in vestibule
1437771_at	68852	68852	1110067I12Rik	46.4127	210.913	4.54429	Up in vestibule
1444270_at	212892	212892	Rshl3	13.5228	96.9908	7.17238	Up in vestibule
1454953_at	217340	217340	Rnf157	178.55	329.227	1.8439	Up in vestibule
1452475_at	18552	18552	Pcsk5	101.087	186.484	1.84478	Up in vestibule
1450199_a_at	192187	192187	Stab1	218.505	698.213	3.19541	Up in vestibule
1428290_at	70478	70478	Mipep	302.909	432.58	1.42809	Up in vestibule
1427035_at	213053	213053	Slc39a14	220.642	332.563	1.50725	Up in vestibule
1455541_a_at	74411	74411	4932443D16Rik	25.5186	57.5006	2.25328	Up in vestibule
1423285_at	12810	12810	Coch	425.156	6261.23	14.7269	Up in vestibule
1434191_at	319660	319660	A530016O06Rik	13.31	26.5794	1.99695	Up in vestibule
1441391_at	13972	13972	Gnb1l	226.359	448.716	1.98232	Up in vestibule
1433959_at	320158	320158	Zmat4	100.177	338.619	3.38021	Up in vestibule
1448870_at	268977	268977	Ltbp1	196.727	672.016	3.41598	Up in vestibule
1420419_a_at	83762	83762	Otof	552.416	1648.99	2.98505	Up in vestibule
1421424_a_at	16790	16790	Anpep	36.5299	53.8374	1.47379	Up in vestibule
1427357_at	72269	72269	Cda	48.6957	129.986	2.66936	Up in vestibule
1452008_at	66819	66819	9130422G05Rik	71.1723	115.525	1.62318	Up in vestibule
1437874_s_at	15212	15212	Hexb	589.857	1004.03	1.70216	Up in vestibule
1430522_a_at	53620	53620	Vamp5	103.647	191.128	1.84402	Up in vestibule
1460668_at	14419	14419	Gal	58.2372	89.7523	1.54115	Up in vestibule
1453396_at	76646	76646	1700123D08Rik	20.2583	27.5887	1.36185	Up in vestibule
1430148_at	19331	19331	Rab19	160.178	204.546	1.277	Up in vestibule
1431339_a_at	27984	27984	Efhd2	242.624	487.5	2.00928	Up in vestibule
1449998_at	18095	18095	Nkx3-1	16.0248	24.6057	1.53548	Up in vestibule
1423555_a_at	99899	99899	Ifi44	37.4326	86.0687	2.2993	Up in vestibule
1452919_a_at	67078	67078	1700012G19Rik	624.64	1105.2	1.76934	Up in vestibule
1460682_s_at	26367	26367	Ceacam2	69.8295	253.157	3.62535	Up in vestibule
1425519_a_at	16149	16149	Ii	50.4644	69.3033	1.37331	Up in vestibule
1460106_at	244653	244653	Hydin	28.3268	116.945	4.12844	Up in vestibule
1425926_a_at	18424	18424	Otx2	292.755	529.406	1.80836	Up in vestibule
1429796_at	224126	224126	Kalrn	39.7645	74.3354	1.86939	Up in vestibule
1448342_at	26414	26414	Mapk10	95.4283	190.311	1.99428	Up in vestibule
1431609_a_at	11433	11433	Acp5	43.4259	501.777	11.5548	Up in vestibule
1445597_s_at	225845	225845	Hrasls3	548.643	983.763	1.79308	Up in vestibule
1452145_at	100198	100198	H6pd	216.17	318.884	1.47516	Up in vestibule
1419073_at	56363	56363	Tmeff2	102.094	294.114	2.88082	Up in vestibule
1425291_at	15223	15223	Foxj1	35.1068	93.9759	2.67686	Up in vestibule
1417643_at	22092	22092	Tsga2	258.622	804.19	3.10951	Up in vestibule
1427095_at	109332	109332	Cdcp1	244.096	301.024	1.23322	Up in vestibule
1452202_at	207728	207728	Pde2a	36.0951	47.7651	1.32331	Up in vestibule
1449135_at	20672	20672	Sox18	40.1865	129.41	3.22025	Up in vestibule
1430584_s_at	12350	12350	Car3	96.7449	404.506	4.18117	Up in vestibule
1428960_at	71233	71233	4933434I06Rik	150.735	608.911	4.03963	Up in vestibule
1460565_at	98396	98396	Slc41a1	633.245	1384.8	2.18684	Up in vestibule
1425214_at	233571	233571	P2ry6	90.1226	282.985	3.14	Up in vestibule
1455262_at	68339	68339	0610010D24Rik	161.186	725.485	4.50092	Up in vestibule
1435029_at	65964	65964	B230120H23Rik	428.029	932.477	2.17854	Up in vestibule
1439194_at	77481	77481	C030048H21Rik	34.2063	115.695	3.38226	Up in vestibule
1435989_x_at	16691	16691	Krt2-8	1535.1	2313.54	1.5071	Up in vestibule
1455859_at	207686	207686	A330021E22Rik	96.4107	402.152	4.17124	Up in vestibule
1435342_at	52150	52150	Kcnk6	62.1167	148.427	2.38948	Up in vestibule
1419402_at	17427	17427	Mns1	74.2423	304.254	4.09812	Up in vestibule
1455204_at	71795	71795	Pitpnc1	397.826	725.147	1.82278	Up in vestibule
1435805_at	108030	108030	Lin7a	309.958	597.045	1.92621	Up in vestibule
1419811_at	28001	28001	D16Wsu65e	130.902	188.489	1.43993	Up in vestibule
1430535_at	72033	72033	Tsc22d2	361.449	666.174	1.84306	Up in vestibule
1446364_at	77629	77629	4930544G21Rik	13.7275	21.7187	1.58213	Up in vestibule
1449455_at	15162	15162	Hck	30.8816	58.849	1.90563	Up in vestibule
1457658_x_at	11746	11746	Anxa4	76.6181	104.63	1.36561	Up in vestibule
1453435_a_at	55990	55990	Fmo2	29.6475	42.0883	1.41962	Up in vestibule
1434983_at	545328	545328	LOC545328	28.292	228.762	8.08576	Up in vestibule
1426911_at	13506	13506	Dsc2	73.602	187.463	2.54698	Up in vestibule
1431530_a_at	56224	56224	Tspan5	21.4203	28.2721	1.31987	Up in vestibule
1440879_at	217262	217262	Abca9	577.281	1280.16	2.21757	Up in vestibule
1434438_at	56045	56045	Samhd1	247.475	350.489	1.41626	Up in vestibule
1418464_at	17183	17183	Matn4	225.521	862.544	3.82468	Up in vestibule
1442298_at	83675	83675	Bicc1	111.52	165.102	1.48047	Up in vestibule
1418492_at	23893	23893	Grem2	38.926	69.7499	1.79186	Up in vestibule
1452190_at	72461	72461	Prcp	110.904	218.856	1.97338	Up in vestibule
1422478_a_at	60525	60525	Acss2	234.113	514.121	2.19604	Up in vestibule
1429139_at	229603	229603	Za20d1	371.458	560.287	1.50835	Up in vestibule
1447547_at	268977	268977	Ltbp1	17.9951	34.275	1.90468	Up in vestibule
1434129_s_at	218454	218454	Lhfpl2	990.067	1423.59	1.43788	Up in vestibule
1453819_x_at	71116	71116	Stx18	114.092	141.836	1.24318	Up in vestibule
1425111_at	66673	66673	Sorcs3	45.5371	137.036	3.00933	Up in vestibule
1415800_at	14609	14609	Gja1	184.042	1223.33	6.64702	Up in vestibule
1435078_at	77097	77097	3526402J09Rik	177.755	296.661	1.66893	Up in vestibule
1418156_at	57814	57814	Kcne4	158.92	225.536	1.41918	Up in vestibule
1416560_at	114644	114644	Slc13a3	24.919	47.0609	1.88856	Up in vestibule
1422545_at	21385	21385	Tbx2	415.011	948.704	2.28597	Up in vestibule
1451941_a_at	14130	14130	Fcgr2b	49.0011	154.262	3.14814	Up in vestibule
1452142_at	232333	232333	Slc6a1	41.0116	267.795	6.52974	Up in vestibule
1434631_at	73852	73852	D3Ertd751e	160.182	211.094	1.31784	Up in vestibule
1434403_at	114716	114716	Spred2	525.243	856.836	1.63131	Up in vestibule
1435477_s_at	14130	14130	Fcgr2b	88.8933	317.756	3.57457	Up in vestibule
1449401_at	12262	12262	C1qg	184.417	671.487	3.64114	Up in vestibule
1453059_at	69642	69642	2310046A06Rik	101.908	193.285	1.89667	Up in vestibule
1425753_a_at	22256	22256	Ung	116.866	168.626	1.4429	Up in vestibule
1436171_at	226652	226652	Arhgap30	30.5269	50.4576	1.65289	Up in vestibule
1436205_at	269116	269116	Nfasc	139.777	257.917	1.84521	Up in vestibule
1433795_at	21814	21814	Tgfbr3	1355.5	2659.79	1.96223	Up in vestibule
1455660_at	12983	12983	Csf2rb1	31.9613	72.9605	2.28277	Up in vestibule
1448027_at	72110	72110	2010305B15Rik	294.824	419.539	1.42302	Up in vestibule
1422878_at	171180	171180	Syt12	56.3329	77.5037	1.37581	Up in vestibule
1417200_at	57439	57439	1300007B12Rik	502.033	686.869	1.36818	Up in vestibule
1452893_s_at	69638	69638	2310040A07Rik	262.953	497.284	1.89115	Up in vestibule
1437296_at	109333	109333	Pkn2	54.2487	73.6808	1.35821	Up in vestibule
1451723_at	231464	231464	Cnot6l	36.7744	47.6287	1.29516	Up in vestibule
1435758_at	56386	56386	B4galt6	410.062	570.751	1.39186	Up in vestibule
1452308_a_at	98660	98660	Atp1a2	99.9259	162.579	1.62699	Up in vestibule
1431839_a_at	70884	70884	4921513D09Rik	14.1371	59.2714	4.19262	Up in vestibule
1437880_at	207667	207667	Lbxcor1	161.157	2980.74	18.4958	Up in vestibule
1448748_at	56193	56193	Plek	57.5256	148.953	2.58933	Up in vestibule
1453173_at	67861	67861	2310005E10Rik	151.185	223.968	1.48141	Up in vestibule
1421207_at	16878	16878	Lif	25.7014	42.3858	1.64916	Up in vestibule
1416101_a_at	50708	50708	Hist1h1c	1384.05	3327.04	2.40384	Up in vestibule
1422725_at	17152	17152	Mak	31.0517	89.0425	2.86756	Up in vestibule
1453261_at	72386	72386	2610035D17Rik	171.185	288.546	1.68558	Up in vestibule
1419493_a_at	21985	21985	Tpd52	1194.01	1766.09	1.47912	Up in vestibule
1460449_at	77531	77531	C030032C09Rik	34.6069	182.318	5.26825	Up in vestibule
1427041_at	230787	230787	BC013712	68.2088	123.633	1.81257	Up in vestibule
1418979_at	105387	105387	9030611N15Rik	14.2551	22.0368	1.54589	Up in vestibule
1426697_a_at	16976	16976	Lrpap1	1080.48	1635.27	1.51347	Up in vestibule
1459900_at	97294	97294	C79468	163.523	256.128	1.56632	Up in vestibule
1418941_at	93893	93893	Pcdhb22	73.9741	95.9296	1.2968	Up in vestibule
1425476_at	12830	12830	Col4a5	975.994	1490.75	1.52741	Up in vestibule
1415834_at	67603	67603	Dusp6	1230.13	1911.56	1.55395	Up in vestibule
1455549_at	228071	228071	Sestd1	529.918	788.731	1.4884	Up in vestibule
1451049_at	27061	27061	Bcap31	2697.81	3596.14	1.33299	Up in vestibule
1416316_at	26458	26458	Slc27a2	233.94	373.306	1.59574	Up in vestibule
1452834_at	72446	72446	2600010E01Rik	57.5805	132.021	2.2928	Up in vestibule
1427975_at	75668	75668	2210403B10Rik	19.2395	95.9299	4.98609	Up in vestibule
1454086_a_at	16909	16909	Lmo2	170.468	420.049	2.46408	Up in vestibule
1435486_at	18481	18481	Pak3	1037.02	2175.39	2.09772	Up in vestibule
1431192_at	68029	68029	2010203O03Rik	45.5465	104.066	2.28483	Up in vestibule
1417165_at	17191	17191	Mbd2	485.711	594.697	1.22439	Up in vestibule
1453183_at	109065	109065	1110034A24Rik	73.3476	135.071	1.84151	Up in vestibule
1428663_at	71305	71305	5133401H06Rik	41.8998	183.098	4.36991	Up in vestibule
1423894_a_at	67789	67789	Dalrd3	294.216	511.885	1.73983	Up in vestibule
1424380_at	330192	330192	Vps37b	365.335	587.022	1.6068	Up in vestibule
1450409_a_at	67739	67739	4930570C03Rik	194.832	281.482	1.44474	Up in vestibule
1454824_s_at	102103	102103	Mtus1	262.954	481.062	1.82945	Up in vestibule
1448649_at	13809	13809	Enpep	1060.18	8269.87	7.8004	Up in vestibule
1416156_at	22330	22330	Vcl	1139.52	1732.84	1.52067	Up in vestibule
1446541_at	381693	381693	4930434E21Rik	23.3434	106.142	4.54698	Up in vestibule
1453148_at	108151	108151	Sema3d	32.3365	78.2671	2.4204	Up in vestibule
1417642_at	56847	56847	Aldh1a3	47.9854	539.995	11.2533	Up in vestibule
1428573_at	69993	69993	Chn2	80.4308	252.07	3.134	Up in vestibule
1426894_s_at	98952	98952	C230093N12Rik	659.535	1227.77	1.86157	Up in vestibule
1428114_at	108052	108052	Slc14a1	33.0545	198.233	5.99716	Up in vestibule
1460717_at	22110	22110	Tspyl1	29.2138	53.7201	1.83886	Up in vestibule
1434593_at	208691	208691	Eif5a2	267.358	706.907	2.64405	Up in vestibule
1450033_a_at	20846	20846	Stat1	56.1349	108.494	1.93274	Up in vestibule
1420405_at	28250	28250	Slco1a4	187.757	652.665	3.47612	Up in vestibule
1448468_a_at	16497	16497	Kcnab1	145.09	304.648	2.09971	Up in vestibule
1448623_at	71929	71929	2310075C12Rik	469.211	665.826	1.41903	Up in vestibule
1421615_at	17910	17910	Myo15	138.599	484.803	3.49789	Up in vestibule
1422735_at	15220	15220	Foxq1	55.4833	107.841	1.94367	Up in vestibule
1426007_a_at	212190	212190	Ubxd3	25.7107	43.3981	1.68794	Up in vestibule
1424349_a_at	226856	226856	Lpgat1	252.095	533.463	2.11612	Up in vestibule
1427383_at	64379	64379	Irx6	30.4777	70.828	2.32392	Up in vestibule
1417251_at	114301	114301	Palmd	147.383	220.403	1.49545	Up in vestibule
1437406_x_at	16010	16010	Igfbp4	5266.65	8308.35	1.57754	Up in vestibule
1429497_s_at	72183	72183	Snx6	716.216	895.829	1.25078	Up in vestibule
1416811_s_at	13024	13024	Ctla2a	77.3211	185.222	2.3955	Up in vestibule
1455332_x_at	14130	14130	Fcgr2b	60.8451	106.85	1.75609	Up in vestibule
1448233_at	19122	19122	Prnp	1656.68	3673.48	2.21738	Up in vestibule
1421963_a_at	12531	12531	Cdc25b	250.731	425.922	1.69872	Up in vestibule
1424515_at	320063	320063	B230354K17Rik	262.175	344.936	1.31567	Up in vestibule
1417902_at	116914	116914	Slc19a2	186.009	342.11	1.83922	Up in vestibule
1424340_at	74665	74665	Lrrc48	101.02	481.085	4.76229	Up in vestibule
1422837_at	64929	64929	Scel	34.1741	481.102	14.078	Up in vestibule
1424683_at	66270	66270	1810015C04Rik	804.898	1474.65	1.83209	Up in vestibule
1421297_a_at	12288	12288	Cacna1c	51.895	75.3468	1.45191	Up in vestibule
1450967_at	66775	66775	4933428I03Rik	249.311	655.418	2.62891	Up in vestibule
1447231_at	20541	20541	Slc8a1	13.3212	31.0293	2.32931	Up in vestibule
1455450_at	19257	19257	Ptpn3	570.047	1040.66	1.82558	Up in vestibule
1427387_a_at	192897	192897	Itgb4	184.895	283.887	1.5354	Up in vestibule
1419759_at	18671	18671	Abcb1a	40.1213	261.405	6.51537	Up in vestibule
1417129_a_at	17536	17536	Mrg1	36.8716	698.258	18.9375	Up in vestibule
1452141_a_at	20363	20363	Sepp1	5149.85	8282.66	1.60833	Up in vestibule
1422631_at	11622	11622	Ahr	867.065	1391.84	1.60523	Up in vestibule
1449184_at	21946	21946	Pglyrp1	25.449	52.9658	2.08125	Up in vestibule
1434740_at	224024	224024	Scarf2	371.295	625.647	1.68504	Up in vestibule
1424172_at	14651	14651	Hagh	504.842	690.86	1.36847	Up in vestibule
1448721_at	52392	52392	D1Ertd622e	190.749	377.029	1.97658	Up in vestibule
1421917_at	18595	18595	Pdgfra	2857.83	5310.14	1.8581	Up in vestibule
1448640_at	108052	108052	Slc14a1	37.8757	140.444	3.70802	Up in vestibule
1436425_at	242553	242553	Ankrd38	252.065	479.58	1.9026	Up in vestibule
1417688_at	80752	80752	BC004044	270.518	539.295	1.99356	Up in vestibule
1460428_at	68420	68420	Ankrd13a	476.217	648.05	1.36083	Up in vestibule
1443814_x_at	13036	13036	Ctsh	246.136	710.756	2.88765	Up in vestibule
1416200_at	77125	77125	9230117N10Rik	376.448	1103.96	2.93257	Up in vestibule
1454159_a_at	16008	16008	Igfbp2	2435.04	7780.03	3.19502	Up in vestibule
1452963_at	68283	68283	9530077C05Rik	63.4664	128.105	2.01847	Up in vestibule
1417235_at	57440	57440	Ehd3	346.019	1751.58	5.0621	Up in vestibule
1445143_at	238328	238328	Vash1	63.8275	112.862	1.76824	Up in vestibule
1452980_at	72834	72834	2810468N07Rik	169.33	567.961	3.35417	Up in vestibule
1450669_at	26403	26403	Map3k11	128.047	178.731	1.39582	Up in vestibule
1448432_at	18799	18799	Plcd1	169.813	287.507	1.69308	Up in vestibule
1452031_at	20512	20512	Slc1a3	583.335	963.716	1.65208	Up in vestibule
1425151_a_at	71893	71893	Noxo1	392.805	690.289	1.75733	Up in vestibule
1422557_s_at	17748	17748	Mt1	219.683	608.197	2.76852	Up in vestibule
1419326_at	67483	67483	1700028P14Rik	29.6231	107.775	3.63819	Up in vestibule
1416714_at	15900	15900	Icsbp1	44.2887	95.979	2.16712	Up in vestibule
1416554_at	54132	54132	Pdlim1	202.115	561.749	2.77935	Up in vestibule
1439725_at	19281	19281	Ptprt	124.825	468.945	3.75684	Up in vestibule
1417143_at	14745	14745	Edg2	700.121	1158.71	1.65501	Up in vestibule
1416371_at	11815	11815	Apod	2175.87	3812.39	1.75212	Up in vestibule
1439101_at	213435	213435	D830007F02Rik	25.547	48.0056	1.87911	Up in vestibule
1437479_x_at	21386	21386	Tbx3	24.7159	157.634	6.37782	Up in vestibule
1429471_at	73721	73721	1110017D15Rik	45.7474	609.93	13.3326	Up in vestibule
1417324_at	17776	17776	Mast2	370.56	645.329	1.74149	Up in vestibule
1448929_at	74145	74145	F13a1	176.864	875.241	4.94867	Up in vestibule
1429033_at	74375	74375	Gcc1	171.763	235.129	1.36892	Up in vestibule
1423424_at	22773	22773	Zic3	10.6956	77.9539	7.28842	Up in vestibule
1422013_at	26888	26888	Clec4a2	45.3257	145.323	3.20618	Up in vestibule
1429768_at	13527	13527	Dtna	244.998	559.411	2.28333	Up in vestibule
1452976_a_at	65962	65962	Slc9a3r2	124.092	196.642	1.58465	Up in vestibule
1434661_at	20972	20972	Syngr1	331.933	574.132	1.72966	Up in vestibule
1441529_at	53625	53625	B3gnt1	38.1442	53.716	1.40824	Up in vestibule
1423640_at	72003	72003	Synpr	48.5402	296.256	6.10331	Up in vestibule
1423807_a_at	12314	12314	Calm2	12557.9	17134.5	1.36444	Up in vestibule
1417620_at	19354	19354	Rac2	106.403	228.466	2.14717	Up in vestibule
1418296_at	18301	18301	Fxyd5	96.0598	208.876	2.17443	Up in vestibule
1454222_a_at	72894	72894	Ccdc13	292.675	546.312	1.86662	Up in vestibule
1421596_s_at	15061	15061	H28	16.7069	49.2499	2.94788	Up in vestibule
1427139_at	224697	224697	Adamts10	224.438	414.888	1.84857	Up in vestibule
1425046_at	228802	228802	BC018465	46.1862	67.492	1.4613	Up in vestibule
1418059_at	170757	170757	Eltd1	20.463	37.4784	1.83152	Up in vestibule
1416424_at	66905	66905	M6prbp1	503.415	671.173	1.33324	Up in vestibule
1419031_at	56473	56473	Fads2	503.438	1123.23	2.23112	Up in vestibule
1429130_at	74407	74407	4933404O19Rik	33.5963	102.795	3.05972	Up in vestibule
1429647_at	69453	69453	1700027L20Rik	21.3036	266.099	12.4908	Up in vestibule
1457026_at	239759	239759	Liph	56.9666	142.669	2.50444	Up in vestibule
1460600_at	245350	245350	LOC245350	160.659	278.852	1.73568	Up in vestibule
1435476_a_at	14130	14130	Fcgr2b	227.233	384.448	1.69186	Up in vestibule
1436675_at	242253	242253	Wdr63	24.8324	274.777	11.0652	Up in vestibule
1420753_at	21892	21892	Tll1	12.138	39.1881	3.22854	Up in vestibule
1419070_at	12879	12879	Cys1	64.7379	216.624	3.34617	Up in vestibule
1454730_at	231225	231225	4932414K18Rik	709.144	914.752	1.28994	Up in vestibule
1449863_a_at	13395	13395	Dlx5	25.5874	62.2152	2.43147	Up in vestibule
1421811_at	21825	21825	Thbs1	373.293	646.4	1.73161	Up in vestibule
1459299_at	329421	329421	A430065P19Rik	114.111	300.354	2.63213	Up in vestibule
1418486_at	22361	22361	Vnn1	40.1577	1349.19	33.5973	Up in vestibule
1422781_at	142980	142980	Tlr3	56.8569	107.245	1.88622	Up in vestibule
1422523_at	20431	20431	Si	143.014	662.023	4.62909	Up in vestibule
1450981_at	12798	12798	Cnn2	663.831	1269.11	1.9118	Up in vestibule
1439864_at	207607	207607	B930008I02Rik	44.6102	297.378	6.66614	Up in vestibule
1432857_at	76882	76882	6430500D05Rik	19.1549	25.7326	1.34339	Up in vestibule
1422616_s_at	75659	75659	Wdr54	62.1817	104.759	1.68473	Up in vestibule
1449418_s_at	66153	66153	Fbxo36	84.016	176.828	2.10469	Up in vestibule
1455180_at	102371	102371	AA407270	174.095	269.789	1.54967	Up in vestibule
1453699_at	74671	74671	4930448D08Rik	12.4669	29.1147	2.33536	Up in vestibule
1448771_a_at	14319	14319	Fth1	6585.14	8279.3	1.25727	Up in vestibule
1417236_at	57440	57440	Ehd3	54.8468	181.611	3.31123	Up in vestibule
1425129_a_at	21351	21351	Taldo1	2623.32	3390.38	1.2924	Up in vestibule
1436293_x_at	27877	27877	D1Ertd471e	167.375	1505.21	8.99305	Up in vestibule
1426146_a_at	212862	212862	Chpt1	66.4313	164.998	2.48374	Up in vestibule
1452135_at	75512	75512	Gpx6	33.9071	75.8508	2.23702	Up in vestibule
1455466_at	243277	243277	Gpr133	31.7859	88.4396	2.78235	Up in vestibule
1429063_s_at	16558	16558	Kif16b	404.289	587.802	1.45391	Up in vestibule
1434925_at	75769	75769	4833424O15Rik	40.2306	148.487	3.6909	Up in vestibule
1417262_at	19225	19225	Ptgs2	13.7554	37.9206	2.75677	Up in vestibule
1417431_a_at	56632	56632	Sphk2	140.21	179.712	1.28173	Up in vestibule
1456603_at	76566	76566	1500005K14Rik	2409.46	7184.8	2.98191	Up in vestibule
1441165_s_at	64085	64085	Clstn2	234.717	592.547	2.52451	Up in vestibule
1455410_at	72393	72393	Faim2	49.0918	94.4769	1.92449	Up in vestibule
1429019_s_at	330260	330260	Pon2	507.202	852.157	1.68011	Up in vestibule
1419589_at	17064	17064	C1qr1	62.7412	280.758	4.47486	Up in vestibule
1420730_a_at	21463	21463	Tcp11	117.941	212.821	1.80448	Up in vestibule
1426968_a_at	98711	98711	Rdh10	332.381	1293.78	3.89246	Up in vestibule
1448889_at	69354	69354	Slc38a4	22.9383	49.1666	2.14343	Up in vestibule
1449314_at	22762	22762	Zfpm2	224.666	560.307	2.49396	Up in vestibule
1436539_at	94040	94040	Clmn	46.1632	97.4813	2.11166	Up in vestibule
1417588_at	14425	14425	Galnt3	240.069	666.021	2.77429	Up in vestibule
1430237_at	75677	75677	Cldn22	170.102	697.99	4.10336	Up in vestibule
1449551_at	17913	17913	Myo1c	29.0346	70.7357	2.43626	Up in vestibule
1451777_at	234311	234311	BC013672	17.9084	44.1994	2.46808	Up in vestibule
1448775_at	15950	15950	Ifi203	42.3533	97.7141	2.30712	Up in vestibule
1433763_at	12499	12499	Entpd5	144.507	210.847	1.45907	Up in vestibule
1436448_a_at	19224	19224	Ptgs1	73.7153	279.587	3.7928	Up in vestibule
1422644_at	50795	50795	Sh3bgr	88.3924	115.643	1.30829	Up in vestibule
1460700_at	20848	20848	Stat3	354.045	762.785	2.15448	Up in vestibule
1417029_a_at	80890	80890	Trim2	25.7882	45.6413	1.76985	Up in vestibule
1419027_s_at	56356	56356	MGI:1929253	837.687	1420.43	1.69566	Up in vestibule
1432083_a_at	16977	16977	Lrpb7	64.235	92.3992	1.43845	Up in vestibule
1419322_at	13998	13998	Fgd6	90.6113	117.497	1.29672	Up in vestibule
1424400_a_at	107747	107747	Fthfd	29.3566	65.3229	2.22515	Up in vestibule
1416441_at	54381	54381	MGI:1889205	2209.09	3249	1.47074	Up in vestibule
1458648_at	107306	107306	AU042950	17.1388	39.9254	2.32952	Up in vestibule
1426452_a_at	68186	68186	4632427E13Rik	99.0583	227.182	2.29341	Up in vestibule
1440456_at	381255	381255	LOC381255	23.8698	51.9854	2.17787	Up in vestibule
1423721_at	22003	22003	Tpm1	402.839	921.053	2.28641	Up in vestibule
1437464_at	104871	104871	Spata7	52.8328	73.4629	1.39048	Up in vestibule
1429907_at	73545	73545	1700094D03Rik	191.707	550.499	2.87157	Up in vestibule
1449556_at	15040	15040	H2-T23	330.366	607.087	1.83762	Up in vestibule
1435997_at	433700	433700	Spag8	45.2874	82.2443	1.81605	Up in vestibule
1417013_at	80888	80888	Hspb8	169.243	385.263	2.27639	Up in vestibule
1453645_at	78449	78449	2700046A07Rik	97.7117	274.793	2.81228	Up in vestibule
1430479_at	69849	69849	2010007H06Rik	37.0749	89.0522	2.40196	Up in vestibule
1436115_at	212539	212539	Gm266	509.607	4480.57	8.79219	Up in vestibule
1427123_s_at	54158	54158	Copg2as2	116.932	191.341	1.63634	Up in vestibule
1417168_a_at	213211	213211	Rnf26	140.417	286.1	2.0375	Up in vestibule
1435386_at	22371	22371	Vwf	22.4351	71.0631	3.16749	Up in vestibule
1424393_s_at	76187	76187	Adhfe1	36.9746	114.301	3.09134	Up in vestibule
1448995_at	56744	56744	Cxcl4	671.47	2133.62	3.17753	Up in vestibule
1453072_at	71862	71862	Gpr160	89.1714	155.195	1.74042	Up in vestibule
1434909_at	52187	52187	Rragd	291.941	597.133	2.04539	Up in vestibule
1417568_at	52589	52589	Ncald	152.611	408.866	2.67914	Up in vestibule
1435541_at	12223	12223	Btc	44.2121	84.8341	1.9188	Up in vestibule
1437928_at	53601	53601	Pcdh12	30.0545	64.5552	2.14794	Up in vestibule
1422821_s_at	170460	170460	Stard5	159.761	226.155	1.41559	Up in vestibule
1454890_at	27494	27494	Amot	914.304	1138.59	1.24531	Up in vestibule
1416904_at	56758	56758	Mbnl1	887.245	1469.96	1.65677	Up in vestibule
1448816_at	19223	19223	Ptgis	220.776	633.229	2.86819	Up in vestibule
1416564_at	20680	20680	Sox7	22.4592	50.678	2.25645	Up in vestibule
1418457_at	57266	57266	Cxcl14	61.3687	453.072	7.38278	Up in vestibule
1418076_at	19143	19143	St14	702.624	1067.84	1.51979	Up in vestibule
1455120_at	242642	242642	Gloxd1	31.6818	61.0179	1.92596	Up in vestibule
1457296_at	214425	214425	Cilp	25.1011	34.8232	1.38732	Up in vestibule
1427203_at	170472	170472	Recql5	45.1893	192.255	4.25444	Up in vestibule
1428443_a_at	110351	110351	Rap1ga1	266.178	406.065	1.52554	Up in vestibule
1424392_at	76187	76187	Adhfe1	35.7922	76.8626	2.14747	Up in vestibule
1436996_x_at	17110	17110	Lzp-s	745.028	2313.84	3.1057	Up in vestibule
1459301_at	17536	17536	Mrg1	54.035	199.204	3.68657	Up in vestibule
1437096_at	73301	73301	1700031F13Rik	49.0144	457.472	9.3334	Up in vestibule
1434793_at	320382	320382	E030030F06Rik	195.928	399.653	2.0398	Up in vestibule
1435936_at	237831	237831	Slc13a5	74.4876	149.117	2.00191	Up in vestibule
1448601_s_at	17701	17701	Msx1	89.4587	138.356	1.54659	Up in vestibule
1425779_a_at	21380	21380	Tbx1	401.444	936.809	2.3336	Up in vestibule
1448939_at	30940	30940	Usp25	375.265	469.757	1.2518	Up in vestibule
1431229_at	77531	77531	C030032C09Rik	13.2767	23.6623	1.78224	Up in vestibule
1454592_at	77244	77244	9430012M22Rik	92.3841	181.714	1.96694	Up in vestibule
1460691_at	213753	213753	Zfp598	451.518	565.232	1.25185	Up in vestibule
1426454_at	11857	11857	Arhgdib	79.8043	228.794	2.86694	Up in vestibule
1433595_at	242585	242585	Slc35d1	146.873	194.779	1.32617	Up in vestibule
1452160_at	99929	99929	Tiparp	122.518	227.539	1.85719	Up in vestibule
1443187_at	72780	72780	Thsd2	24.4985	66.8493	2.72871	Up in vestibule
1419494_a_at	21985	21985	Tpd52	424.94	804.701	1.89368	Up in vestibule
1446747_at	320277	320277	C230086A09Rik	13.2084	23.0818	1.7475	Up in vestibule
1440354_at	74559	74559	Elovl7	21.5128	39.273	1.82556	Up in vestibule
1416411_at	14863	14863	Gstm2	118.152	255.134	2.15937	Up in vestibule
1419316_s_at	13972	13972	Gnb1l	117.433	182.498	1.55405	Up in vestibule
1455840_at	217944	217944	Rapgef5	177.814	347.686	1.95534	Up in vestibule
1448424_at	20378	20378	Frzb	39.674	99.4073	2.5056	Up in vestibule
1429987_at	80982	80982	9930013L23Rik	447.41	1199.09	2.68007	Up in vestibule
1437890_at	72014	72014	1500005I02Rik	17.3749	28.5131	1.64105	Up in vestibule
1431029_at	74711	74711	Ttll9	19.0765	29.2975	1.53579	Up in vestibule
1428834_at	319520	319520	Dusp4	162.51	307.835	1.89425	Up in vestibule
1424089_a_at	21413	21413	Tcf4	326.013	805.675	2.4713	Up in vestibule
1418865_at	29813	29813	Zfp385	157.149	242.833	1.54524	Up in vestibule
1460344_at	229534	229534	Pbxip1	299.244	547.737	1.8304	Up in vestibule
1424923_at	20715	20715	Serpina3g	32.8296	81.6626	2.48747	Up in vestibule
1437046_x_at	75007	75007	4930504E06Rik	799.563	1059.45	1.32504	Up in vestibule
1452326_at	69047	69047	1810010G06Rik	60.7952	342.018	5.62573	Up in vestibule
1454795_at	319876	319876	Cobll1	341.086	631.845	1.85245	Up in vestibule
1434440_at	14677	14677	Gnai1	250.466	562.496	2.2458	Up in vestibule
1424404_at	76261	76261	0610040J01Rik	102.1	275.586	2.69918	Up in vestibule
1450410_a_at	67739	67739	4930570C03Rik	538.461	839.258	1.55862	Up in vestibule
1425213_at	76886	76886	6430514L14Rik	65.5801	102.603	1.56455	Up in vestibule
1451261_s_at	106766	106766	AW049765	194.773	324.967	1.66844	Up in vestibule
1452327_at	232227	232227	Iqsec1	279.092	379.005	1.358	Up in vestibule
1451537_at	12654	12654	Chi3l1	43.2262	84.2646	1.94939	Up in vestibule
1419725_at	23985	23985	Slc26a4	283.935	1128.18	3.97337	Up in vestibule
1422919_at	27281	27281	Hrasls	76.0478	116.586	1.53307	Up in vestibule
1426691_at	74094	74094	Tjp4	458.339	916.39	1.99937	Up in vestibule
1448055_at	320181	320181	Fndc7	27.8563	66.022	2.37009	Up in vestibule
1450713_at	29873	29873	Cspg5	137.971	671.079	4.86393	Up in vestibule
1418981_at	12364	12364	Casp12	76.9213	177.262	2.30446	Up in vestibule
1416255_at	14612	14612	Gja4	38.7641	82.656	2.13228	Up in vestibule
1436913_at	229776	229776	Cdc14a	401.99	935.643	2.32752	Up in vestibule
1422620_s_at	19012	19012	Ppap2a	534.626	912.511	1.70682	Up in vestibule
1416654_at	20530	20530	Slc31a2	256.075	451.743	1.76411	Up in vestibule
1427512_a_at	16774	16774	Lama3	32.5965	75.9239	2.32921	Up in vestibule
1450543_at	330171	330171	Kctd10	47.7878	92.3882	1.9333	Up in vestibule
1426501_a_at	211550	211550	MGI:2182965	125.023	259.531	2.07587	Up in vestibule
1443934_at	234912	234912	9230110C19Rik	83.7403	136.322	1.62792	Up in vestibule
1418293_at	15958	15958	Ifit2	123.843	229.112	1.85002	Up in vestibule
1444731_at	18578	18578	Pde4b	34.5356	69.8826	2.0235	Up in vestibule
1416815_s_at	12237	12237	Bub3	2365.87	6122.39	2.5878	Up in vestibule
1451650_at	70503	70503	5330420D20Rik	17.8632	22.264	1.24636	Up in vestibule
1424940_s_at	217887	217887	BC022687	153.495	213.367	1.39006	Up in vestibule
1448823_at	20315	20315	Cxcl12	1218.83	2685.72	2.20352	Up in vestibule
1455377_at	70892	70892	4921517B04Rik	363.505	653.876	1.79881	Up in vestibule
1417821_at	110956	110956	D17H6S56E-5	56.86	138.148	2.42961	Up in vestibule
1436346_at	235505	235505	Cd109	43.7839	105.972	2.42035	Up in vestibule
1418957_at	20840	20840	Stac	56.2364	175.565	3.12191	Up in vestibule
1427501_at	209601	209601	BC007180	273.506	593.092	2.16848	Up in vestibule
1417843_s_at	98845	98845	Eps8l2	203.663	295.691	1.45186	Up in vestibule
1416094_at	11502	11502	Adam9	781.008	1299.22	1.66352	Up in vestibule
1433963_a_at	108101	108101	BC032204	22.7727	55.104	2.41974	Up in vestibule
1425407_s_at	26888	26888	Clec4a2	61.7406	115.439	1.86974	Up in vestibule
1416527_at	67844	67844	Rab32	95.7244	157.596	1.64635	Up in vestibule
1422662_at	56048	56048	Lgals8	458.382	706.43	1.54114	Up in vestibule
1429212_a_at	69358	69358	Lrrc51	195.141	298.624	1.5303	Up in vestibule
1423593_a_at	12978	12978	Csf1r	203.282	528.852	2.60156	Up in vestibule
1417952_at	13110	13110	Cyp2j6	344.277	668.253	1.94103	Up in vestibule
1439915_at	17536	17536	Mrg1	17.3866	121.517	6.98911	Up in vestibule
1427537_at	223650	223650	Eppk1	37.4288	243.244	6.49885	Up in vestibule
1422789_at	19378	19378	Aldh1a2	934.212	2110.35	2.25896	Up in vestibule
1436544_at	231287	231287	Atp10d	217.13	372.119	1.71381	Up in vestibule
1421434_at	110082	110082	Dnahc5	24.1796	30.6018	1.2656	Up in vestibule
1452985_at	72565	72565	Uaca	481.634	971.846	2.01781	Up in vestibule
1437469_at	319530	319530	A030007D23Rik	36.9392	68.7466	1.86107	Up in vestibule
1423805_at	13132	13132	Dab2	515.788	1918.64	3.71982	Up in vestibule
1448390_a_at	20148	20148	Dhrs3	245.071	545.372	2.22537	Up in vestibule
1449408_at	67374	67374	Jam2	174.615	385.553	2.20801	Up in vestibule
1455851_at	12160	12160	Bmp5	579.129	915.279	1.58044	Up in vestibule
1432075_a_at	21689	21689	Tekt1	98.4049	473.889	4.8157	Up in vestibule
1460107_at	330577	330577	1700129I04Rik	19.7276	124.216	6.29655	Up in vestibule
1417282_at	26561	26561	Mmp23	159.366	298.493	1.87301	Up in vestibule
1435343_at	210293	210293	Dock10	211.433	585.463	2.76902	Up in vestibule
1449106_at	14778	14778	Gpx3	248.7	1462.67	5.88125	Up in vestibule
1437029_at	21338	21338	Tacr3	17.5792	590.469	33.5891	Up in vestibule
1451886_at	11790	11790	Apeg1	18.0876	22.7989	1.26047	Up in vestibule
1427168_a_at	12818	12818	Col14a1	532.512	1712.95	3.21673	Up in vestibule
1425039_at	223272	223272	Itgbl1	259.3	865.564	3.33809	Up in vestibule
1421006_at	94216	94216	Col4a6	50.2389	73.4788	1.46259	Up in vestibule
1428628_at	68870	68870	1190002A17Rik	33.0173	82.654	2.50335	Up in vestibule
1451567_a_at	15950	15950	Ifi203	30.5845	84.0825	2.74918	Up in vestibule
1438841_s_at	11847	11847	Arg2	120.468	349.277	2.89934	Up in vestibule
1435980_x_at	22420	22420	Wnt6	49.1629	119.969	2.44023	Up in vestibule
1426025_s_at	16792	16792	Laptm5	172.041	386.966	2.24927	Up in vestibule
1443921_at	223332	223332	C130037N17Rik	223.332	675.741	3.02572	Up in vestibule
1454997_at	320183	320183	Msrb3	504.824	1133.51	2.24536	Up in vestibule
1436027_at	106326	106326	Osbpl11	311.74	455.813	1.46216	Up in vestibule
1425303_at	103988	103988	Gck	44.2315	110.248	2.49252	Up in vestibule
1417070_at	102294	102294	Cyp4v3	48.8484	146.911	3.00749	Up in vestibule
1433775_at	97130	97130	C77080	386.508	600.281	1.55309	Up in vestibule
1433577_at	225583	225583	A730017C20Rik	903.007	1481.72	1.64087	Up in vestibule
1422953_at	14289	14289	Fpr-rs2	26.4383	32.7537	1.23888	Up in vestibule
1454757_s_at	52668	52668	D12Ertd647e	1770.85	2775.07	1.56709	Up in vestibule
1429954_at	73149	73149	Clec4a3	22.4653	117.687	5.23862	Up in vestibule
1433885_at	544963	544963	Iqgap2	338.912	839.361	2.47664	Up in vestibule
1449831_at	67344	67344	1700055O19Rik	35.2538	261.833	7.42709	Up in vestibule
1428705_at	69327	69327	1700007K13Rik	24.9597	127.45	5.10622	Up in vestibule
1429440_at	72301	72301	1810041L15Rik	90.4463	203.027	2.24472	Up in vestibule
1448747_at	67731	67731	Fbxo32	475.326	1093.09	2.29966	Up in vestibule
1428176_at	14739	14739	Edg5	259.051	383.365	1.47988	Up in vestibule
1442894_at	330355	330355	Dnahc6	63.2422	312.838	4.94667	Up in vestibule
1455369_at	319924	319924	Apba1	271.47	837.414	3.08474	Up in vestibule
1452654_at	70546	70546	Zdhhc2	640.509	885.08	1.38184	Up in vestibule
1418380_at	21749	21749	Terf1	49.9779	86.714	1.73504	Up in vestibule
1426298_at	16372	16372	Irx2	149.356	411.375	2.75433	Up in vestibule
1454974_at	18208	18208	Ntn1	79.4149	606.17	7.63295	Up in vestibule
1435334_at	225049	225049	Ttc7	83.8982	346.918	4.13499	Up in vestibule
1417373_a_at	20872	20872	Stk16	2202.27	6810.85	3.09265	Up in vestibule
1419873_s_at	12978	12978	Csf1r	323.329	1107.88	3.42647	Up in vestibule
1436792_at	434204	434204	BB081391	37.6881	58.5154	1.55263	Up in vestibule
1434342_at	20203	20203	S100b	1240.55	2673.12	2.15478	Up in vestibule
1429267_at	329910	329910	Acot11	66.4401	107.564	1.61896	Up in vestibule
1433678_at	104759	104759	Pld4	43.7076	101.807	2.32929	Up in vestibule
1422169_a_at	12064	12064	Bdnf	83.8917	306.063	3.64831	Up in vestibule
1417090_at	19672	19672	Rcn1	3482.01	6325.89	1.81673	Up in vestibule
1423570_at	11307	11307	Abcg1	702.565	1137.59	1.6192	Up in vestibule
1452779_at	76980	76980	3110006E14Rik	166.55	236.375	1.41924	Up in vestibule
1435195_at	104880	104880	D930046M13Rik	437.638	802.205	1.83303	Up in vestibule
1425221_at	403205	403205	E030025L21Rik	906.24	2082.94	2.29844	Up in vestibule
1443534_at	56758	56758	Mbnl1	55.5479	110.354	1.98664	Up in vestibule
1436659_at	13175	13175	Dcamkl1	2020.3	3105.39	1.53709	Up in vestibule
1434235_at	20516	20516	Slc20a2	654.325	1067.88	1.63203	Up in vestibule
1422622_at	18127	18127	Nos3	48.5742	82.5779	1.70004	Up in vestibule
1425804_at	15372	15372	Hmx2	27.4256	392.897	14.3259	Up in vestibule
1418870_at	67752	67752	4930579J09Rik	34.9813	286.935	8.20252	Up in vestibule
1421358_at	14991	14991	H2-M3	59.4244	98.7193	1.66126	Up in vestibule
1460330_at	11745	11745	Anxa3	124.968	271.829	2.1752	Up in vestibule
1441174_a_at	239833	239833	Lmln	27.7683	42.0471	1.51421	Up in vestibule
1419278_at	170707	170707	Usp48	435.786	559.204	1.28321	Up in vestibule
1448617_at	12508	12508	Cd53	48.4139	108.674	2.24469	Up in vestibule
1443175_at	192167	192167	Nlgn1	25.5893	78.9654	3.08588	Up in vestibule
1429618_at	74256	74256	Cyld	733.246	1233.03	1.6816	Up in vestibule
1419567_at	66930	66930	Fank1	39.9542	103.347	2.58664	Up in vestibule
1420824_at	20354	20354	Sema4d	273.157	396.69	1.45224	Up in vestibule
1418724_at	12630	12630	Cfi	398.638	598.795	1.5021	Up in vestibule
1449514_at	14773	14773	Gprk5	74.0319	106.481	1.43832	Up in vestibule
1429201_at	74256	74256	Cyld	269.307	405.269	1.50486	Up in vestibule
1435745_at	223739	223739	5031439G07Rik	673.436	1354.09	2.01072	Up in vestibule
1424037_at	228550	228550	Itpka	16.9834	21.7094	1.27827	Up in vestibule
1458115_at	75111	75111	4930512H18Rik	32.1359	123.35	3.83839	Up in vestibule
1426927_at	11775	11775	Ap3b2	213.561	548.299	2.56741	Up in vestibule
1423414_at	19224	19224	Ptgs1	73.2991	200.636	2.73723	Up in vestibule
1426263_at	260299	260299	Igsf4c	313.209	621.599	1.98462	Up in vestibule
1427355_at	12310	12310	Calca	22.607	92.8446	4.1069	Up in vestibule
1437217_at	140577	140577	Ankrd6	511.435	1276.59	2.49609	Up in vestibule
1455663_at	244198	244198	Olfml1	460.545	690.257	1.49878	Up in vestibule
1424096_at	110308	110308	Krt2-5	56.876	90.8956	1.59814	Up in vestibule
1424769_s_at	109624	109624	Cald1	1116.14	1834.38	1.6435	Up in vestibule
1454622_at	209837	209837	Slc38a5	29.3044	61.9567	2.11425	Up in vestibule
1422649_at	53870	53870	Cntn6	18.152	85.1008	4.68823	Up in vestibule
1416385_a_at	17113	17113	M6pr	794.184	1001.29	1.26077	Up in vestibule
1455707_at	223332	223332	C130037N17Rik	89.099	208.022	2.33473	Up in vestibule
1452432_at	21788	21788	Tfpi	37.1706	69.3853	1.86667	Up in vestibule
1458755_at	57810	57810	Cdon	49.4988	108.769	2.19741	Up in vestibule
1450505_a_at	66270	66270	1810015C04Rik	164.199	359.119	2.1871	Up in vestibule
1437452_x_at	22333	22333	Vdac1	19.2721	25.2443	1.30989	Up in vestibule
1427448_at	19069	19069	Nup88	135.803	191.523	1.4103	Up in vestibule
1416330_at	12520	12520	Cd81	3924.65	6401.19	1.63102	Up in vestibule
1437123_at	105450	105450	Mmrn2	33.4163	61.3851	1.83698	Up in vestibule
1434967_at	67263	67263	Zswim6	427.156	715.032	1.67393	Up in vestibule
1433734_at	243755	243755	Slc13a4	69.8949	198.232	2.83614	Up in vestibule
1460125_at	546765	546765	LOC546765	17.3439	28.5723	1.6474	Up in vestibule
1418935_at	17364	17364	Trpm1	38.2417	127.706	3.33944	Up in vestibule
1435580_at	244895	244895	C230081A13Rik	501.864	961.712	1.91628	Up in vestibule
1419417_at	22341	22341	Vegfc	115.382	219.645	1.90362	Up in vestibule
1430376_at	78257	78257	4921529O18Rik	14.1837	19.1213	1.34811	Up in vestibule
1417169_at	213211	213211	Rnf26	194.486	274.639	1.41213	Up in vestibule
1417999_at	16432	16432	Itm2b	6956.9	9197.85	1.32212	Up in vestibule
1420764_at	20284	20284	Scrg1	26.5306	63.572	2.39618	Up in vestibule
1423635_at	12156	12156	Bmp2	73.0076	148.857	2.03893	Up in vestibule
1416253_at	12581	12581	Cdkn2d	286.415	565.402	1.97407	Up in vestibule
1418262_at	20963	20963	Syk	39.244	62.0081	1.58007	Up in vestibule
1448508_at	103213	103213	Traf3ip2	136.384	215.755	1.58196	Up in vestibule
1450700_at	260409	260409	Cdc42ep3	267.757	461.248	1.72264	Up in vestibule
1453837_at	193385	193385	6330500D04Rik	37.7897	55.3519	1.46474	Up in vestibule
1455435_s_at	12289	12289	Cacna1d	193.327	670.719	3.46936	Up in vestibule
1416199_at	16582	16582	Kifc3	266.351	449.22	1.68657	Up in vestibule
1434068_s_at	103814	103814	AI662270	16.3161	37.2418	2.28251	Up in vestibule
1417923_at	18481	18481	Pak3	241.089	469.799	1.94865	Up in vestibule
1438399_at	58869	58869	Pex2	59.9879	154.317	2.57247	Up in vestibule
1460235_at	12492	12492	Scarb2	204.27	314.566	1.53995	Up in vestibule
1421118_a_at	14766	14766	Gpr56	25.5277	49.2176	1.92801	Up in vestibule
1426195_a_at	13010	13010	Cst3	6872.79	8580.77	1.24851	Up in vestibule
1415939_at	14264	14264	Fmod	120.681	536.169	4.44288	Up in vestibule
1420913_at	24059	24059	Slco2a1	76.8721	461.411	6.00232	Up in vestibule
1434548_at	26943	26943	Tde1	349.288	558.592	1.59923	Up in vestibule
1456435_at	76866	76866	4930417P05Rik	52.3567	96.9152	1.85105	Up in vestibule
1454862_at	208177	208177	Phldb2	875.728	1213.62	1.38584	Up in vestibule
1454942_at	63913	63913	Niban	70.2349	151.402	2.15565	Up in vestibule
1436181_at	211914	211914	Ddef2	232.037	426.627	1.83861	Up in vestibule
1419204_at	13388	13388	Dll1	91.0434	408.884	4.49109	Up in vestibule
1436515_at	319905	319905	E030004N02Rik	152.195	271.295	1.78255	Up in vestibule
1423396_at	11606	11606	Agt	87.5269	211.308	2.4142	Up in vestibule
1435142_at	108735	108735	Sft2d2	129.323	182.868	1.41404	Up in vestibule
1421115_a_at	74168	74168	Zdhhc16	681.518	863.329	1.26677	Up in vestibule
1418627_at	14630	14630	Gclm	199.836	263.569	1.31892	Up in vestibule
1418649_at	112407	112407	Egln3	81.3871	190.125	2.33606	Up in vestibule
1455424_at	75607	75607	Wnk2	22.436	27.6841	1.23391	Up in vestibule
1435767_at	235281	235281	Scn3b	241.808	668.995	2.76664	Up in vestibule
1453181_x_at	22038	22038	Plscr1	118.338	263.03	2.22271	Up in vestibule
1439911_at	432942	432942	LOC432942	25.1177	40.8804	1.62755	Up in vestibule
1449079_s_at	54613	54613	St3gal6	77.7821	132.348	1.70152	Up in vestibule
1418796_at	20256	20256	Clec11a	175.728	587.32	3.34221	Up in vestibule
1424807_at	16775	16775	Lama4	640.909	898.529	1.40196	Up in vestibule
1435459_at	55990	55990	Fmo2	34.38	124.558	3.62298	Up in vestibule
1417995_at	19260	19260	Ptpn22	29.5142	141.307	4.78776	Up in vestibule
1420678_a_at	50905	50905	Il17rb	90.743	156.642	1.72622	Up in vestibule
1438799_at	320038	320038	Dlx6os1	17.5663	43.6931	2.48733	Up in vestibule
1441371_at	243743	243743	Plxna4	81.6544	125.599	1.53817	Up in vestibule
1436614_at	106945	106945	AI843639	164.253	467.644	2.84709	Up in vestibule
1450182_at	12733	12733	Clcnka	93.7098	154.284	1.6464	Up in vestibule
1433978_at	68281	68281	4930430F08Rik	130.434	178.246	1.36657	Up in vestibule
1417399_at	14456	14456	Gas6	263.429	772.131	2.93107	Up in vestibule
1421074_at	13123	13123	Cyp7b1	378.561	622.859	1.64533	Up in vestibule
1448756_at	20202	20202	S100a9	17.3559	32.5038	1.87278	Up in vestibule
1430112_at	269701	269701	Wdr66	28.7593	199.477	6.93609	Up in vestibule
1447551_x_at	319387	319387	Lphn3	360.023	506.729	1.40749	Up in vestibule
1433787_at	338352	338352	B230343H07Rik	158.308	287.47	1.81589	Up in vestibule
1418674_at	18414	18414	Osmr	31.0256	164.683	5.30797	Up in vestibule
1428420_a_at	74190	74190	1200009I06Rik	30.7553	212.399	6.90609	Up in vestibule
1430217_at	74354	74354	4921528H16Rik	29.0293	119.596	4.11984	Up in vestibule
1455379_at	75563	75563	Dnali1	28.7532	66.9065	2.32693	Up in vestibule
1448303_at	93695	93695	Gpnmb	80.504	210.113	2.60997	Up in vestibule
1429552_at	71860	71860	1700019F09Rik	124.763	1234.41	9.89398	Up in vestibule
1460681_at	26367	26367	Ceacam2	160.119	258.922	1.61705	Up in vestibule
1451428_x_at	353156	353156	Egfl7	292.714	400.652	1.36875	Up in vestibule
1437161_x_at	19663	19663	Rbpms	86.6921	158.386	1.827	Up in vestibule
1434779_at	12405	12405	Cbln2	28.1414	65.6917	2.33434	Up in vestibule
1454834_at	18028	18028	Nfib	1808.89	2247.44	1.24244	Up in vestibule
1429071_at	109264	109264	Me3	138.246	395.997	2.86443	Up in vestibule
1438886_at	56198	56198	Heyl	172.274	293.283	1.70242	Up in vestibule
1459815_at	332934	332934	Zmynd12	84.6419	146.254	1.72791	Up in vestibule
1434354_at	109731	109731	Maob	99.5488	177.77	1.78576	Up in vestibule
1443838_x_at	56473	56473	Fads2	111.738	262.145	2.34608	Up in vestibule
1448749_at	56193	56193	Plek	13.8434	25.303	1.8278	Up in vestibule
1437176_at	434341	434341	LOC434341	13.7958	18.4379	1.33648	Up in vestibule
1433485_x_at	14766	14766	Gpr56	49.493	112.73	2.2777	Up in vestibule
1449336_a_at	20874	20874	Slk	86.3671	185.575	2.14868	Up in vestibule
1447065_at	330070	330070	9630041C05	66.8689	133.095	1.99039	Up in vestibule
1455279_at	381738	381738	Gm1060	63.3786	529.147	8.349	Up in vestibule
1425951_a_at	56620	56620	Clec4n	11.8292	31.3634	2.65134	Up in vestibule
1455372_at	208922	208922	Cpeb3	70.1753	134.498	1.91661	Up in vestibule
1418939_at	15284	15284	Hlx1	37.0837	65.0216	1.75337	Up in vestibule
1435169_at	77128	77128	A930001N09Rik	167.393	216.486	1.29328	Up in vestibule
1440162_x_at	328187	328187	A630043P06	72.4435	302.789	4.17965	Up in vestibule
1425846_a_at	140904	140904	Caln1	30.5228	44.6723	1.46357	Up in vestibule
1433917_x_at	329372	329372	D2Bwg1423e	96.2444	128.501	1.33516	Up in vestibule
1416629_at	20514	20514	Slc1a5	33.7684	85.4388	2.53014	Up in vestibule
1416926_at	60599	60599	Trp53inp1	1355.74	1920.83	1.41681	Up in vestibule
1421471_at	18166	18166	Npy1r	21.019	48.2568	2.29587	Up in vestibule
1451475_at	67784	67784	Plxnd1	139.129	199.565	1.43439	Up in vestibule
1419627_s_at	56620	56620	Clec4n	48.9673	164.76	3.3647	Up in vestibule
1429366_at	71827	71827	Lrrc34	40.4047	182.815	4.5246	Up in vestibule
1429072_at	68553	68553	1110001D15Rik	29.2319	64.2648	2.19845	Up in vestibule
1447496_s_at	66930	66930	Fank1	176.174	296.323	1.68199	Up in vestibule
1417528_at	50525	50525	Spag6	62.1065	221.977	3.57413	Up in vestibule
1426300_at	11658	11658	Alcam	179.934	398.622	2.21538	Up in vestibule
1440323_at	20980	20980	Syt2	74.1611	133.049	1.79406	Up in vestibule
1450241_a_at	14017	14017	Evi2a	38.3271	157.505	4.10949	Up in vestibule
1427081_at	320770	320770	A630072M18Rik	91.6819	121.46	1.3248	Up in vestibule
1425298_a_at	17940	17940	Birc1a	37.7203	75.2305	1.99443	Up in vestibule
1433586_at	68799	68799	Rgmb	285.715	553.444	1.93705	Up in vestibule
1453558_at	75040	75040	4930504H06Rik	22.081	77.531	3.51121	Up in vestibule
1416918_at	53310	53310	Dlgh3	259.658	352.816	1.35877	Up in vestibule
1419482_at	12267	12267	C3ar1	53.2536	131.455	2.46848	Up in vestibule
1418476_at	12931	12931	Crlf1	194.935	320.315	1.64319	Up in vestibule
1428574_a_at	69993	69993	Chn2	19.44	49.1886	2.53027	Up in vestibule
1453043_at	74088	74088	0610012H03Rik	42.9886	89.4365	2.08047	Up in vestibule
1426225_at	19662	19662	Rbp4	52.4902	1631.84	31.0884	Up in vestibule
1428987_at	75465	75465	Dncl2b	301.478	1023.88	3.39619	Up in vestibule
1428836_at	69478	69478	2300009A05Rik	144.078	295.503	2.05099	Up in vestibule
1420337_at	14472	14472	Gbx2	12.9973	21.1282	1.62559	Up in vestibule
1456073_s_at	208098	208098	Panx3	22.9769	267.418	11.6386	Up in vestibule
1452302_at	234094	234094	Arhgef10	123.66	225.581	1.8242	Up in vestibule
1417150_at	15567	15567	Slc6a4	36.121	115.92	3.20921	Up in vestibule
1419708_at	22420	22420	Wnt6	100.914	188.14	1.86435	Up in vestibule
1450876_at	12628	12628	Cfh	26.193	204.77	7.81775	Up in vestibule
1452354_at	72792	72792	2810459M11Rik	23.4928	45.7891	1.94907	Up in vestibule
1439503_at	22690	22690	Zfp28	86.369	106.794	1.23648	Up in vestibule
1433744_at	211187	211187	AI841794	115.65	524.122	4.53197	Up in vestibule
1433969_at	106734	106734	AU067824	148.887	441.389	2.9646	Up in vestibule
1457840_at	243743	243743	Plxna4	38.3757	75.6821	1.97214	Up in vestibule
1441891_x_at	74559	74559	Elovl7	191.218	386.696	2.02228	Up in vestibule
1446342_at	76432	76432	2310001H17Rik	18.7653	31.7504	1.69197	Up in vestibule
1452492_a_at	56857	56857	Slc37a2	33.7667	96.1322	2.84695	Up in vestibule
1416273_at	21928	21928	Tnfaip2	80.8129	994.07	12.3009	Up in vestibule
1433783_at	24131	24131	Ldb3	57.4978	217.295	3.77918	Up in vestibule
1429250_at	110350	110350	Dnchc2	314.78	556.91	1.76921	Up in vestibule
1450494_x_at	26365	26365	Ceacam1	59.985	123.674	2.06175	Up in vestibule
1448956_at	56018	56018	Stard10	1105.25	1437.87	1.30095	Up in vestibule
1416454_s_at	11475	11475	Acta2	75.8552	153.368	2.02186	Up in vestibule
1440091_at	17536	17536	Mrg1	30.1543	297.315	9.85979	Up in vestibule
1420150_at	74646	74646	Spsb1	173.051	331.112	1.91338	Up in vestibule
1429012_at	73341	73341	Arhgef6	347.395	488.757	1.40692	Up in vestibule
1429678_at	70617	70617	5730508B09Rik	258.071	483.128	1.87207	Up in vestibule
1430852_at	69797	69797	1600029I14Rik	97.4355	418.228	4.29235	Up in vestibule
1449279_at	14776	14776	Gpx2	132.02	839.343	6.35772	Up in vestibule
1432556_a_at	75429	75429	3100002J23Rik	28.0604	454.797	16.2078	Up in vestibule
1418736_at	26879	26879	B3galt3	211.444	281.019	1.32905	Up in vestibule
1435564_at	319749	319749	C230078M08Rik	48.4522	84.8337	1.75087	Up in vestibule
1416693_at	14234	14234	Foxc2	191.899	526.753	2.74495	Up in vestibule
1445599_at	320181	320181	Fndc7	32.5379	55.6079	1.70902	Up in vestibule
1418095_at	66106	66106	Smpx	977.651	2789.21	2.85297	Up in vestibule
1428801_at	17309	17309	Mgat3	176.318	253.047	1.43518	Up in vestibule
1419097_a_at	13830	13830	Stom	90.4668	195.819	2.16454	Up in vestibule
1418329_at	66522	66522	Pgpep1	193.677	293.882	1.51738	Up in vestibule
1455137_at	217944	217944	Rapgef5	668.144	1388.09	2.07753	Up in vestibule
1437765_at	208922	208922	Cpeb3	42.8109	71.3106	1.66571	Up in vestibule
1421970_a_at	14800	14800	Gria2	23.3785	43.5857	1.86435	Up in vestibule
1447556_x_at	73545	73545	1700094D03Rik	31.503	67.2825	2.13575	Up in vestibule
1422471_at	72129	72129	Pex13	964.372	1209.7	1.25439	Up in vestibule
1423632_at	73212	73212	3110082I17Rik	63.1633	93.4153	1.47895	Up in vestibule
1432217_a_at	71860	71860	1700019F09Rik	16.5177	68.0143	4.11766	Up in vestibule
1417408_at	14066	14066	F3	101.052	385.335	3.81322	Up in vestibule
1424468_s_at	102693	102693	Phldb1	474.524	703.41	1.48235	Up in vestibule
1418483_a_at	14594	14594	Ggta1	113.753	183.565	1.61372	Up in vestibule
1434385_at	216810	216810	Tom1l2	569.535	713.188	1.25223	Up in vestibule
1416321_s_at	116847	116847	Prelp	196.348	421.974	2.14911	Up in vestibule
1425546_a_at	22041	22041	Trf	177.889	872.602	4.90533	Up in vestibule
1452751_at	13593	13593	Ebf3	213.71	310.942	1.45497	Up in vestibule
1417761_at	11808	11808	Apoa4	94.3446	317.502	3.36534	Up in vestibule
1450193_at	15165	15165	Hcn1	23.4655	202.663	8.63664	Up in vestibule
1421814_at	17698	17698	Msn	327.005	688.49	2.10544	Up in vestibule
1460256_at	12350	12350	Car3	613.893	4970.12	8.09606	Up in vestibule
1419194_s_at	63986	63986	Gmfg	52.7183	117.209	2.22331	Up in vestibule
1450170_x_at	14964	14964	H2-D1	187.603	634.898	3.38427	Up in vestibule
1429106_at	70857	70857	4921509J17Rik	189.197	442.054	2.33648	Up in vestibule
1426721_s_at	99929	99929	Tiparp	470.762	780.859	1.65871	Up in vestibule
1456060_at	17132	17132	Maf	542.742	1078.17	1.98653	Up in vestibule
1451253_at	218699	218699	Pxk	127.561	179.586	1.40784	Up in vestibule
1436587_at	76646	76646	1700123D08Rik	71.2535	117.398	1.64761	Up in vestibule
1423023_at	54612	54612	Sfrp5	59.24	179.382	3.02805	Up in vestibule
1445913_at	320453	320453	A730090H04Rik	24.6741	53.6994	2.17635	Up in vestibule
1420404_at	12524	12524	Cd86	42.8725	109.606	2.55656	Up in vestibule
1416382_at	13032	13032	Ctsc	1000.8	1990.94	1.98935	Up in vestibule
1459073_x_at	223272	223272	Itgbl1	22.7586	37.8306	1.66226	Up in vestibule
1429553_at	68709	68709	Cilp2	54.2074	92.4849	1.70613	Up in vestibule
1437527_x_at	17210	17210	Mcl1	1807.04	2288.82	1.26661	Up in vestibule
1449008_at	22158	22158	Tulp3	1034.35	1730.29	1.67282	Up in vestibule
1417256_at	17386	17386	Mmp13	19.3763	514.904	26.5739	Up in vestibule
1437726_x_at	12260	12260	C1qb	118.348	410.657	3.46991	Up in vestibule
1435066_at	71795	71795	Pitpnc1	468.472	958.958	2.04699	Up in vestibule
1449031_at	12705	12705	Cited1	169.083	304.792	1.80262	Up in vestibule
1418592_at	58233	58233	Dnaja4	35.4623	58.841	1.65926	Up in vestibule
1432513_a_at	75434	75434	1700001C02Rik	61.4844	221.283	3.59901	Up in vestibule
1457413_at	26563	26563	Ror1	29.1529	66.9587	2.29681	Up in vestibule
1453343_s_at	69922	69922	Vrk2	68.6932	92.4337	1.3456	Up in vestibule
1456392_at	320840	320840	Negr1	303.256	669.17	2.20662	Up in vestibule
1419598_at	68774	68774	Ms4a6d	15.8939	51.4631	3.23791	Up in vestibule
1419666_x_at	56312	56312	Nupr1	185.046	392.141	2.11915	Up in vestibule
1454995_at	69219	69219	Ddah1	684.158	1317.28	1.9254	Up in vestibule
1434804_at	75914	75914	Sec15l2	215.157	282.167	1.31145	Up in vestibule
1455221_at	11307	11307	Abcg1	100.484	242.812	2.41641	Up in vestibule
1448620_at	14131	14131	Fcgr3	130.842	470.177	3.59346	Up in vestibule
1426752_at	269424	269424	Phf17	366.427	559.475	1.52684	Up in vestibule
1420349_at	19220	19220	Ptgfr	35.4049	91.505	2.58453	Up in vestibule
1428812_at	73287	73287	1700040L02Rik	85.4426	174.459	2.04182	Up in vestibule
1455679_at	109019	109019	5830411E10Rik	23.3518	42.7494	1.83067	Up in vestibule
1417810_a_at	23970	23970	Pacsin2	822.151	1231.01	1.49731	Up in vestibule
1416286_at	19736	19736	Rgs4	60.7303	162.27	2.67197	Up in vestibule
1419249_at	18647	18647	Pftk1	368.608	487.009	1.32121	Up in vestibule
1455487_at	69900	69900	2600014M03Rik	524.238	682.496	1.30188	Up in vestibule
1451462_a_at	15976	15976	Ifnar2	500.371	717.41	1.43376	Up in vestibule
1419648_at	17913	17913	Myo1c	108.655	163.851	1.508	Up in vestibule
1452179_at	269424	269424	Phf17	92.4433	156.584	1.69384	Up in vestibule
1421944_a_at	11889	11889	Asgr1	22.3835	56.4629	2.52253	Up in vestibule
1416456_a_at	81600	81600	Chia	92.443	212.047	2.29381	Up in vestibule
1418195_at	171212	171212	Galnt10	291.398	508.246	1.74417	Up in vestibule
1421544_at	13411	13411	Dnahc11	78.5171	332.544	4.2353	Up in vestibule
1456069_at	13527	13527	Dtna	249.998	505.204	2.02083	Up in vestibule
1424208_at	19219	19219	Ptger4	43.4212	94.0382	2.16572	Up in vestibule
1453593_at	73569	73569	1700110N18Rik	31.753	67.6846	2.1316	Up in vestibule
1456557_at	73332	73332	1700041C02Rik	92.6884	231.615	2.49885	Up in vestibule
1460695_a_at	72061	72061	2010111I01Rik	422.755	519.179	1.22809	Up in vestibule
1435308_at	14348	14348	Fut9	139.347	253.577	1.81975	Up in vestibule
1418913_at	64918	64918	Bhmt2	15.1635	37.5153	2.47406	Up in vestibule
1416289_at	18822	18822	Plod1	663.91	1268.44	1.91056	Up in vestibule
1421633_a_at	12950	12950	Hapln1	15.1458	24.7269	1.6326	Up in vestibule
1429275_at	76057	76057	5830448L21Rik	93.7421	186.017	1.98435	Up in vestibule
1417047_at	192212	192212	Prom2	44.0945	338.498	7.67664	Up in vestibule
1434366_x_at	12260	12260	C1qb	143.98	367.609	2.5532	Up in vestibule
1419476_at	58860	58860	Adamdec1	17.7381	34.7106	1.95684	Up in vestibule
1455995_at	215821	215821	D10Bwg1379e	41.0229	78.0779	1.90328	Up in vestibule
1454983_at	235461	235461	B230380D07Rik	327.523	555.622	1.69644	Up in vestibule
1424930_s_at	213956	213956	MGC27770	48.4766	129.833	2.67826	Up in vestibule
1453372_at	13418	13418	Dnajc1	54.0657	77.8319	1.43958	Up in vestibule
1449183_at	12846	12846	Comt	555.76	769.658	1.38488	Up in vestibule
1451454_at	219257	219257	Pcdh20	20.4931	102.075	4.98095	Up in vestibule
1452403_a_at	18256	18256	Oc90	15354.3	21913.7	1.4272	Up in vestibule
1438770_at	212539	212539	Gm266	25.8612	44.6787	1.72763	Up in vestibule
1424097_at	74559	74559	Elovl7	163.837	488.746	2.98312	Up in vestibule
1453588_at	12350	12350	Car3	13.5916	33.2087	2.44332	Up in vestibule
1441969_at	28105	28105	Trim36	863.908	1466.22	1.69719	Up in vestibule
1424592_a_at	13419	13419	Dnase1	477.434	1181.67	2.47504	Up in vestibule
1417291_at	21937	21937	Tnfrsf1a	834.452	1123.37	1.34623	Up in vestibule
1437319_at	52304	52304	D9Ertd414e	15.6897	21.2547	1.35469	Up in vestibule
1448523_at	53885	53885	Nphp1	491.039	706.042	1.43785	Up in vestibule
1451860_a_at	20128	20128	Trim30	19.6214	55.2377	2.81518	Up in vestibule
1422645_at	15216	15216	Hfe	118.637	336.467	2.8361	Up in vestibule
1419125_at	19253	19253	Ptpn18	68.3189	123.879	1.81325	Up in vestibule
1417275_at	17153	17153	Mal	1056.76	2233.57	2.1136	Up in vestibule
1453055_at	214968	214968	Sema6d	889.693	2532.59	2.84659	Up in vestibule
1460001_at	66522	66522	Pgpep1	237.685	287.007	1.20751	Up in vestibule
1438097_at	19332	19332	Rab20	48.7521	122.826	2.5194	Up in vestibule
1450686_at	320276	320276	A130027P21Rik	271.321	448.699	1.65376	Up in vestibule
1437331_a_at	236511	236511	Eif2c1	2127.82	2932.58	1.37821	Up in vestibule
1425811_a_at	13007	13007	Csrp1	25.7763	34.5722	1.34124	Up in vestibule
1417951_at	13808	13808	Eno3	281.512	441.163	1.56712	Up in vestibule
1416766_at	67247	67247	Mosc2	1579.95	3018.18	1.9103	Up in vestibule
1428186_at	71393	71393	Kctd6	597.132	1108.98	1.85718	Up in vestibule
1416667_at	13595	13595	Ebp	324.492	467.833	1.44174	Up in vestibule
1417012_at	15529	15529	Sdc2	89.4894	239.179	2.67271	Up in vestibule
1421385_a_at	17921	17921	Myo7a	221.967	596.384	2.68681	Up in vestibule
1430313_at	77739	77739	Adamtsl1	84.2209	253.528	3.01027	Up in vestibule
1433750_at	20529	20529	Slc31a1	393.718	632.11	1.60549	Up in vestibule
1453333_at	69364	69364	1700012P22Rik	45.6533	116.997	2.56273	Up in vestibule
1430600_at	67272	67272	Cklfsf5	533.112	1011.5	1.89735	Up in vestibule
1441624_at	234214	234214	9430041O17Rik	207.096	822.502	3.9716	Up in vestibule
1424457_at	225372	225372	Apbb3	239.967	306.914	1.27898	Up in vestibule
1438321_x_at	75007	75007	4930504E06Rik	676.05	907.486	1.34234	Up in vestibule
1426729_at	78408	78408	2900046G09Rik	64.0409	107.244	1.67462	Up in vestibule
1437667_a_at	319905	319905	E030004N02Rik	114.726	167.961	1.46402	Up in vestibule
1419599_s_at	68774	68774	Ms4a6d	42.6738	124.188	2.91017	Up in vestibule
1438973_x_at	14609	14609	Gja1	24.897	54.0491	2.17091	Up in vestibule
1420498_a_at	13132	13132	Dab2	634.746	2400.51	3.78185	Up in vestibule
1428931_a_at	67287	67287	Parp6	148.409	251.201	1.69263	Up in vestibule
1447841_x_at	54613	54613	St3gal6	120.252	153.627	1.27754	Up in vestibule
1416178_a_at	27276	27276	Plekhb1	4462.68	9120.95	2.04383	Up in vestibule
1427072_at	236920	236920	Stard8	348.916	731.782	2.0973	Up in vestibule
1450992_a_at	17268	17268	Meis1	114.902	342.146	2.97772	Up in vestibule
1417098_s_at	26922	26922	Nrbf1	259.513	383.319	1.47707	Up in vestibule
1441350_at	14174	14174	Fgf3	39.8811	141.207	3.54071	Up in vestibule
1449462_at	67307	67307	3110049J23Rik	40.8117	56.3758	1.38137	Up in vestibule
1436866_at	13640	13640	Efna5	279.483	639.107	2.28675	Up in vestibule
1422903_at	17084	17084	Ly86	140.098	318.553	2.27379	Up in vestibule
1433741_at	12494	12494	Cd38	111.412	317.419	2.84905	Up in vestibule
1449239_at	74264	74264	1700045I19Rik	37.4442	50.9157	1.35977	Up in vestibule
1433956_at	12562	12562	Cdh5	38.4185	134.325	3.49636	Up in vestibule
1437197_at	234214	234214	9430041O17Rik	365.879	1556.77	4.25489	Up in vestibule
1426633_s_at	233529	233529	Kctd14	176.67	401.262	2.27124	Up in vestibule
1460555_at	193385	193385	6330500D04Rik	397.054	875.078	2.20392	Up in vestibule
1451410_a_at	114570	114570	Crip3	38.7815	209.024	5.3898	Up in vestibule
1451059_at	66758	66758	4933409D10Rik	76.1015	172.136	2.26192	Up in vestibule
1426987_at	108676	108676	5430417L22Rik	228.468	293.726	1.28564	Up in vestibule
1434028_at	11864	11864	Arnt2	576.102	1210.39	2.10099	Up in vestibule
1455050_at	320736	320736	E130203B14Rik	365.435	731.908	2.00284	Up in vestibule
1454786_at	223739	223739	5031439G07Rik	212.216	298.705	1.40755	Up in vestibule
1443558_s_at	103466	103466	C630002B14Rik	832.164	1350.25	1.62257	Up in vestibule
1424047_at	232449	232449	Dera	392.255	611.063	1.55782	Up in vestibule
1452148_at	16976	16976	Lrpap1	842.977	1332.1	1.58024	Up in vestibule
1435960_at	545923	545923	LOC545923	369.228	709.446	1.92143	Up in vestibule
1424440_at	121022	121022	Mrps6	469.893	1137.02	2.41974	Up in vestibule
1423952_a_at	110310	110310	Krt2-7	118.058	481.617	4.07948	Up in vestibule
1416942_at	80898	80898	MGI:1933403	102.846	164.351	1.59803	Up in vestibule
1416242_at	67455	67455	Klhl13	158.495	265.894	1.67762	Up in vestibule
1424670_s_at	68520	68520	Zfyve21	935.937	1144.35	1.22268	Up in vestibule
1417022_at	11989	11989	Slc7a3	58.0114	120.399	2.07544	Up in vestibule
1417775_at	20019	20019	Rpo1-4	166.171	228.447	1.37477	Up in vestibule
1453345_at	70701	70701	3830408G10Rik	66.2746	166.407	2.51087	Up in vestibule
1431429_a_at	11861	11861	Arl4	596.135	1143.13	1.91757	Up in vestibule
1448181_at	66277	66277	Klf15	205.974	371.921	1.80567	Up in vestibule
1458438_at	108811	108811	4933415L06Rik	161.372	250.723	1.5537	Up in vestibule
1424715_at	67442	67442	0610039N19Rik	96.6358	171.32	1.77284	Up in vestibule
1438910_a_at	13830	13830	Stom	142.255	339.227	2.38464	Up in vestibule
1416675_s_at	18799	18799	Plcd1	289.815	478.753	1.65193	Up in vestibule
1429111_at	70549	70549	Tln2	378.201	746.773	1.97454	Up in vestibule
1429717_at	76582	76582	Ipo11	33.0299	118.601	3.59071	Up in vestibule
1429602_at	69655	69655	Cd164l2	275.213	394.26	1.43256	Up in vestibule
1417871_at	15490	15490	Hsd17b7	224.822	507.527	2.25746	Up in vestibule
1424478_at	67378	67378	Bbs2	267.077	393.362	1.47284	Up in vestibule
1419306_at	66717	66717	4921513E08Rik	31.5811	132.13	4.18385	Up in vestibule
1430396_at	70487	70487	5730403I07Rik	38.3139	97.7494	2.55128	Up in vestibule
1441035_at	16509	16509	Kcne1	39.0667	838.543	21.4644	Up in vestibule
1428896_at	68797	68797	Pdgfrl	627.696	1284.13	2.04578	Up in vestibule
1440468_at	98303	98303	D630023F18Rik	55.1409	110.193	1.9984	Up in vestibule
1427891_at	231931	231931	Gimap6	30.9543	53.1641	1.71751	Up in vestibule
1427318_s_at	226101	226101	Fer1l3	145.656	364.252	2.50076	Up in vestibule
1416689_at	22156	22156	Tuft1	236.479	498.712	2.10891	Up in vestibule
1435494_s_at	109620	109620	Dsp	432.134	1035.63	2.39653	Up in vestibule
1457523_at	320650	320650	9530056K15Rik	167.564	445.311	2.65755	Up in vestibule
1455020_at	102141	102141	Snx25	442.392	656.074	1.48301	Up in vestibule
1418723_at	65086	65086	Edg7	85.6248	333.869	3.8992	Up in vestibule
1423653_at	11928	11928	Atp1a1	1043.34	1734.1	1.66207	Up in vestibule
1428096_at	76582	76582	Ipo11	531.422	876.662	1.64965	Up in vestibule
1421137_a_at	18768	18768	Pkib	18.1233	50.6944	2.7972	Up in vestibule
1448199_at	102334	102334	Ankrd10	684.008	932.261	1.36294	Up in vestibule
1418847_at	11847	11847	Arg2	181.602	518.084	2.85286	Up in vestibule
1429143_at	71062	71062	Tekt3	19.4484	56.4321	2.90164	Up in vestibule
1453310_at	73075	73075	Ppil6	103.44	457.199	4.41994	Up in vestibule
1435385_at	228911	228911	MGI:2153084	490.081	836.508	1.70688	Up in vestibule
1429728_at	252876	252876	4930429M06Rik	163.712	239.508	1.46298	Up in vestibule
1426139_a_at	252837	252837	Ccrl1	68.0242	93.0962	1.36857	Up in vestibule
1438664_at	19088	19088	Prkar2b	267.234	539.055	2.01716	Up in vestibule
1433564_at	227333	227333	Dgkd	279.849	379.209	1.35505	Up in vestibule
1436471_at	76877	76877	Rab36	257.542	376.225	1.46083	Up in vestibule
1458427_at	237911	237911	Brip1	24.7189	100.677	4.07287	Up in vestibule
1455669_at	213081	213081	Wdr19	313.602	482.096	1.53728	Up in vestibule
1429893_at	69933	69933	2810004A10Rik	750.9	1495.7	1.99187	Up in vestibule
1425364_a_at	17254	17254	Slc3a2	803.08	1658.39	2.06503	Up in vestibule
1435323_a_at	218121	218121	Oact1	87.1777	220.388	2.52803	Up in vestibule
1451442_at	216618	216618	4931428D14Rik	689.686	939.863	1.36274	Up in vestibule
1428168_at	68481	68481	Mpzl1	1678.64	3604.44	2.14724	Up in vestibule
1418664_at	17475	17475	Mpdz	1032.34	1700.39	1.64712	Up in vestibule
1427568_a_at	68259	68259	Wdr56	398.979	575.02	1.44123	Up in vestibule
1449010_at	18415	18415	Hspa4l	213.365	539.996	2.53086	Up in vestibule
1449307_at	72185	72185	2810427I04Rik	135.228	214.503	1.58624	Up in vestibule
1452865_at	76612	76612	Lrrc27	62.0891	211.782	3.41094	Up in vestibule
1423100_at	14281	14281	Fos	140.314	368.929	2.6293	Up in vestibule
1417669_at	76192	76192	6330583M11Rik	867.51	1367.21	1.57601	Up in vestibule
1450005_x_at	106565	106565	Egfl9	345.113	701.524	2.03274	Up in vestibule
1418615_at	11899	11899	Astn1	155.503	320.335	2.05999	Up in vestibule
1445148_at	11677	11677	Akr1b3	27.7467	47.8917	1.72603	Up in vestibule
1452353_at	68526	68526	Gpr155	276.365	644.666	2.33266	Up in vestibule
1456567_x_at	14824	14824	Grn	3095.81	3831.03	1.23749	Up in vestibule
1460444_at	109689	109689	Arrb1	149.53	238.274	1.59349	Up in vestibule
1423768_at	54445	54445	Unc93b1	101.823	149.407	1.46732	Up in vestibule
1416723_at	21413	21413	Tcf4	869.364	1702.41	1.95822	Up in vestibule
1434492_at	101351	101351	A130022J15Rik	45.8296	66.0905	1.44209	Up in vestibule
1416379_at	55991	55991	Panx1	288.744	360.234	1.24759	Up in vestibule
1453924_a_at	19220	19220	Ptgfr	15.7159	32.5466	2.07093	Up in vestibule
1433947_at	58222	58222	Rab37	25.4083	118.362	4.65842	Up in vestibule
1427199_at	72313	72313	2510002A14Rik	194.148	290.826	1.49796	Up in vestibule
1426784_at	217333	217333	Trim47	50.196	108.03	2.15217	Up in vestibule
1420888_at	12048	12048	Bcl2l1	656.647	1060.44	1.61493	Up in vestibule
1438112_at	77288	77288	9430021M05Rik	18.907	36.4281	1.9267	Up in vestibule
1427496_at	99100	99100	AI851464	112.872	325.731	2.88584	Up in vestibule
1456335_at	226866	226866	Gm106	142.347	1754.3	12.3241	Up in vestibule
1455157_a_at	234839	234839	2310061F22Rik	616.693	957.827	1.55317	Up in vestibule
1440605_at	238021	238021	Fscn2	91.013	262.546	2.88471	Up in vestibule
1416724_x_at	21413	21413	Tcf4	479.7	1184.08	2.46837	Up in vestibule
1431191_a_at	20979	20979	Syt1	44.614	20.6637	0.463166	Up in cochlea
1455883_a_at	74342	74342	Lrrtm1	588.465	63.9781	0.10872	Up in cochlea
1419393_at	27409	27409	Abcg5	173.387	24.9003	0.143611	Up in cochlea
1437945_x_at	53605	53605	Nap1l1	4000.18	2135.89	0.533949	Up in cochlea
1451499_at	320405	320405	Cadps2	2070.82	1000.53	0.483155	Up in cochlea
1439066_at	11600	11600	Angpt1	192.357	138.263	0.718783	Up in cochlea
1423910_at	213990	213990	Centg3	180.233	141.133	0.783058	Up in cochlea
1457139_at	319974	319974	Auts2	2031.62	502.181	0.247182	Up in cochlea
1415841_at	13427	13427	Dncic2	1571.89	1250.79	0.795725	Up in cochlea
1418726_a_at	21956	21956	Tnnt2	181.734	56.5012	0.3109	Up in cochlea
1434109_at	212531	212531	Sh3bgrl2	231.807	41.3987	0.178591	Up in cochlea
1439651_at	16911	16911	Lmo4	150.439	81.1902	0.539688	Up in cochlea
1418237_s_at	12822	12822	Col18a1	2591.68	1190.26	0.45926	Up in cochlea
1448261_at	12550	12550	Cdh1	1512.49	1153.23	0.762473	Up in cochlea
1438482_at	66894	66894	Wwp2	84.9727	53.1909	0.625977	Up in cochlea
1437031_at	216739	216739	Acsl6	42.5952	28.143	0.660709	Up in cochlea
1423854_a_at	68939	68939	Rasl11b	2367.6	996.423	0.420858	Up in cochlea
1448832_a_at	12889	12889	Cplx1	2117.21	246.906	0.116618	Up in cochlea
1417411_at	58243	58243	Nap1l5	253.807	81.378	0.320629	Up in cochlea
1441944_s_at	238252	238252	Gpr135	130.631	92.9171	0.711292	Up in cochlea
1423281_at	20257	20257	Stmn2	135.982	16.6706	0.122594	Up in cochlea
1457819_at	20274	20274	Scn9a	19.1538	14.4179	0.752745	Up in cochlea
1423280_at	20257	20257	Stmn2	683.387	46.9432	0.068692	Up in cochlea
1459713_s_at	101772	101772	Tmem16a	2216.58	354.748	0.160043	Up in cochlea
1422671_s_at	72560	72560	Naalad2	785.044	314.074	0.400073	Up in cochlea
1452624_at	74342	74342	Lrrtm1	242.572	62.713	0.258534	Up in cochlea
1458205_at	17155	17155	Man1a	53.4443	30.2268	0.565576	Up in cochlea
1441186_at	20689	20689	Sall3	294.527	82.0488	0.278578	Up in cochlea
1435807_at	12540	12540	Cdc42	495.173	101.413	0.204803	Up in cochlea
1437122_at	12043	12043	Bcl2	328.953	114.471	0.347987	Up in cochlea
1454849_x_at	12759	12759	Clu	26435.6	3457.25	0.13078	Up in cochlea
1437433_at	26878	26878	B3galt2	28.1686	12.2394	0.434505	Up in cochlea
1436987_at	319909	319909	5430433G21Rik	144.496	75.7104	0.523963	Up in cochlea
1416159_at	11819	11819	Nr2f2	673.014	278.363	0.413606	Up in cochlea
1422831_at	14119	14119	Fbn2	1406.93	699.482	0.497168	Up in cochlea
1430088_at	70227	70227	3000002G13Rik	71.605	57.8475	0.80787	Up in cochlea
1428833_at	73805	73805	4930406D14Rik	251.199	131.735	0.524425	Up in cochlea
1452386_at	20689	20689	Sall3	634.704	238.907	0.376407	Up in cochlea
1418417_at	17681	17681	Msc	214.426	78.2359	0.364861	Up in cochlea
1417155_at	18109	18109	Nmyc1	444.484	135.354	0.30452	Up in cochlea
1421436_at	14804	14804	Grid2	79.6752	51.4379	0.645595	Up in cochlea
1451249_at	212528	212528	D8Ertd812e	332.288	214.501	0.645527	Up in cochlea
1423312_at	21983	21983	Tpbg	86.7804	32.9478	0.379669	Up in cochlea
1416702_at	20713	20713	Serpini1	126.409	45.34	0.358676	Up in cochlea
1448931_at	14063	14063	F2rl1	203.361	74.8096	0.367866	Up in cochlea
1420994_at	108105	108105	B3gnt5	193.982	35.8442	0.184781	Up in cochlea
1451008_at	20451	20451	St8sia3	167.817	76.8932	0.458197	Up in cochlea
1435110_at	107449	107449	Unc5b	698.638	227.256	0.325284	Up in cochlea
1440425_at	23964	23964	Odz2	149.227	31.0475	0.208056	Up in cochlea
1417493_at	12151	12151	Bmi1	1263.96	1040.33	0.823071	Up in cochlea
1424134_at	67610	67610	4930470D19Rik	578.569	415.546	0.718231	Up in cochlea
1443485_at	13841	13841	Epha7	1626.91	547.098	0.33628	Up in cochlea
1448413_at	71952	71952	2410016O06Rik	417.699	236.008	0.565018	Up in cochlea
1433944_at	226098	226098	Hectd2	67.9141	19.5371	0.287675	Up in cochlea
1439843_at	12326	12326	Camk4	237.036	24.5298	0.103486	Up in cochlea
1453326_at	75697	75697	3300001A09Rik	175.807	94.3444	0.536637	Up in cochlea
1448991_a_at	226180	226180	Ina	83.5993	23.6662	0.283091	Up in cochlea
1449686_s_at	20280	20280	Scp2	3754.05	2263.46	0.602939	Up in cochlea
1436444_at	329641	329641	6030405A18	107.986	40.0339	0.370731	Up in cochlea
1424100_s_at	57754	57754	1500001H12Rik	99.4792	52.5704	0.528456	Up in cochlea
1451129_at	12308	12308	Calb2	1798.68	829.139	0.460971	Up in cochlea
1416301_a_at	13591	13591	Ebf1	1111.39	398.411	0.35848	Up in cochlea
1428089_at	76965	76965	Slitrk1	38.6964	21.2275	0.548566	Up in cochlea
1418690_at	19283	19283	Ptprz1	30.4424	18.6746	0.61344	Up in cochlea
1431569_a_at	72585	72585	Lypd1	225.322	78.4884	0.348339	Up in cochlea
1434857_at	232785	232785	A230106D06Rik	263.451	203.572	0.772714	Up in cochlea
1417499_at	30059	30059	Timm10	1111.45	777.357	0.699407	Up in cochlea
1426852_x_at	18133	18133	Nov	3114.38	301.828	0.0969142	Up in cochlea
1448957_at	19664	19664	Rbpsuh	495.62	325.674	0.657103	Up in cochlea
1455720_at	216725	216725	Adamts2	218.257	53.6298	0.245719	Up in cochlea
1456487_at	432530	432530	Adcy1	640.752	433.381	0.676363	Up in cochlea
1423812_s_at	232023	232023	AW146242	424.594	271.376	0.639142	Up in cochlea
1448886_at	14462	14462	Gata3	1650.47	72.5447	0.043954	Up in cochlea
1445167_at	58227	58227	9630031F12Rik	60.7089	24.7252	0.407275	Up in cochlea
1451634_at	72704	72704	2810051F02Rik	170.807	93.2063	0.545682	Up in cochlea
1447623_s_at	399614	399614	C130009A20Rik	1192.76	706.669	0.592468	Up in cochlea
1449286_at	80883	80883	Ntng1	191.992	90.0475	0.469017	Up in cochlea
1449733_s_at	102432	102432	D9Mgi7	1530.68	983.781	0.642709	Up in cochlea
1434458_at	14313	14313	Fst	509.042	42.2372	0.082974	Up in cochlea
1437698_at	17919	17919	Myo5b	346.548	124.14	0.358218	Up in cochlea
1419990_at	320174	320174	A830082K12Rik	92.1604	46.0117	0.499256	Up in cochlea
1456130_at	553091	553091	LOC553091	410.457	122.938	0.299515	Up in cochlea
1448990_a_at	17912	17912	Myo1b	239.06	112.592	0.470976	Up in cochlea
1439983_a_at	171209	171209	Accn3	193.993	38.9071	0.200559	Up in cochlea
1454782_at	210933	210933	Bai3	44.081	14.654	0.332434	Up in cochlea
1434921_at	21907	21907	Nr2e1	100.539	9.95745	0.0990403	Up in cochlea
1422181_at	12789	12789	Cnga2	47.1394	19.2948	0.409314	Up in cochlea
1418601_at	26358	26358	Aldh1a7	1554.61	487.254	0.313425	Up in cochlea
1419889_at	68675	68675	1110033M05Rik	218.151	32.5639	0.149272	Up in cochlea
1448251_at	71566	71566	9030425E11Rik	190.024	126.725	0.666887	Up in cochlea
1455172_at	239114	239114	Il17d	161.873	106.713	0.659242	Up in cochlea
1429314_at	229521	229521	Syt11	258.743	139.946	0.54087	Up in cochlea
1423703_at	235036	235036	Ppan	330.112	253.692	0.768504	Up in cochlea
1422518_at	12361	12361	Cask	1072.65	692.685	0.64577	Up in cochlea
1447382_at	78928	78928	Pigt	39.5637	31.7121	0.801543	Up in cochlea
1421195_at	12425	12425	Cckar	58.4657	15.1216	0.258641	Up in cochlea
1434045_at	12576	12576	Cdkn1b	462.891	249.874	0.539813	Up in cochlea
1436188_a_at	234593	234593	Ndrg4	1821.22	714.041	0.392068	Up in cochlea
1422720_at	16392	16392	Isl1	1583.37	465.744	0.294148	Up in cochlea
1416160_at	11819	11819	Nr2f2	163.438	56.2772	0.344333	Up in cochlea
1429274_at	71897	71897	2310010M24Rik	1042.09	301.271	0.289104	Up in cochlea
1429256_at	17263	17263	Gtl2	268.386	68.5216	0.25531	Up in cochlea
1427492_at	69693	69693	Pof1b	67.7236	15.2096	0.224583	Up in cochlea
1420512_at	56811	56811	Dkk2	621.41	88.8492	0.14298	Up in cochlea
1423450_a_at	15476	15476	Hs3st1	403.035	224.692	0.5575	Up in cochlea
1435987_x_at	68786	68786	1110059G02Rik	130.993	73.2134	0.558911	Up in cochlea
1450781_at	15364	15364	Hmga2	80.385	31.3953	0.390562	Up in cochlea
1456981_at	209760	209760	Tmc7	131.409	63.2151	0.481057	Up in cochlea
1434800_at	64176	64176	Sv2b	106.893	43.9823	0.411461	Up in cochlea
1455015_at	71310	71310	4933431N12Rik	149.136	99.8896	0.669788	Up in cochlea
1418157_at	13865	13865	Nr2f1	4348.42	1050.74	0.241638	Up in cochlea
1444259_at	105364	105364	AW495222	35.6523	19.1027	0.535807	Up in cochlea
1440204_at	15228	15228	Foxg1	116.83	16.4757	0.141023	Up in cochlea
1418713_at	13180	13180	Pcbd1	469.493	333.256	0.709821	Up in cochlea
1442122_at	56526	56526	Sept6	119.304	70.2171	0.588559	Up in cochlea
1455754_at	109593	109593	Lmo3	188.937	30.1187	0.159411	Up in cochlea
1442363_at	68617	68617	1110012J17Rik	176.726	90.9302	0.514526	Up in cochlea
1435059_at	13196	13196	Ddef1	620.333	370.396	0.597092	Up in cochlea
1449389_at	21349	21349	Tal1	55.2643	25.6937	0.464924	Up in cochlea
1417318_at	56710	56710	Dbccr1	120.578	29.3651	0.243536	Up in cochlea
1448391_at	56382	56382	Rab9	1244.13	983.139	0.79022	Up in cochlea
1456509_at	68725	68725	1110032F04Rik	111.721	46.6129	0.417226	Up in cochlea
1416623_at	21827	21827	Thbs3	260.339	115.032	0.441854	Up in cochlea
1444974_at	101769	101769	AU023617	1946.06	107.312	0.0551431	Up in cochlea
1451095_at	27053	27053	Asns	402.977	294.304	0.730325	Up in cochlea
1425092_at	320873	320873	Cdh10	140.836	55.4564	0.393766	Up in cochlea
1418517_at	16373	16373	Irx3	2150.12	518.836	0.241305	Up in cochlea
1435667_at	116837	116837	Rims1	73.2167	34.9133	0.476849	Up in cochlea
1419127_at	109648	109648	Npy	1040.86	155.895	0.149775	Up in cochlea
1448125_at	19762	19762	Rit2	26.6662	19.1429	0.717872	Up in cochlea
1419673_at	20745	20745	Spock1	747.654	219.425	0.293485	Up in cochlea
1455750_at	381383	381383	BC053994	387.724	119.947	0.309361	Up in cochlea
1420381_a_at	114641	114641	Rpl31	1641.79	1049.8	0.639425	Up in cochlea
1440200_at	58227	58227	9630031F12Rik	611.129	137.29	0.224649	Up in cochlea
1429196_at	29809	29809	Rabgap1l	700.848	157.898	0.225296	Up in cochlea
1418626_a_at	12759	12759	Clu	13658.4	1413.31	0.103476	Up in cochlea
1458381_at	224796	224796	Clic5	155.011	73.7803	0.475968	Up in cochlea
1448927_at	140492	140492	Kcnn2	65.8453	47.5838	0.72266	Up in cochlea
1451094_at	207182	207182	Ggtl3	198.019	90.0798	0.454904	Up in cochlea
1430128_a_at	70335	70335	Dp1l1	81.1457	47.376	0.583838	Up in cochlea
1447749_at	232187	232187	Smyd5	21.2751	12.9552	0.608938	Up in cochlea
1451991_at	13841	13841	Epha7	1342.37	364.561	0.27158	Up in cochlea
1430912_a_at	21684	21684	Tectb	18462.5	6911.2	0.374336	Up in cochlea
1440029_at	20451	20451	St8sia3	149.492	90.1905	0.603314	Up in cochlea
1426955_at	12822	12822	Col18a1	3477.15	1691.93	0.486585	Up in cochlea
1435624_at	71529	71529	9030409G11Rik	212.846	73.8039	0.346748	Up in cochlea
1420401_a_at	56089	56089	Ramp3	517.728	78.7025	0.152015	Up in cochlea
1416221_at	14314	14314	Fstl1	12439.2	6971.06	0.560412	Up in cochlea
1417005_at	16593	16593	Kns2	737.902	317.269	0.42996	Up in cochlea
1426022_a_at	22351	22351	Vill	160.171	81.5522	0.509156	Up in cochlea
1421072_at	54352	54352	Irx5	1477.75	495.574	0.335357	Up in cochlea
1453630_at	71685	71685	Galnt14	24.3033	19.1423	0.787641	Up in cochlea
1439658_at	320502	320502	Lmod3	238.518	17.1815	0.0720345	Up in cochlea
1435180_at	242608	242608	Podn	237.213	73.0848	0.308098	Up in cochlea
1449930_a_at	66256	66256	Ssr2	2095.13	1529.53	0.730041	Up in cochlea
1437265_at	327824	327824	5330438D12Rik	83.3382	66.1769	0.794077	Up in cochlea
1418449_at	16763	16763	Lad1	358.534	190.45	0.531191	Up in cochlea
1448558_a_at	18783	18783	Pla2g4a	423.286	139.762	0.330184	Up in cochlea
1430425_at	237979	237979	Sdk2	381.767	204.849	0.536581	Up in cochlea
1458229_at	268902	268902	Robo2	49.2454	13.1232	0.266485	Up in cochlea
1426540_at	71946	71946	2310067E08Rik	134.721	102.936	0.76407	Up in cochlea
1435060_at	50876	50876	Tmod2	133.749	55.5889	0.415621	Up in cochlea
1437550_at	72162	72162	Dhx36	697.495	526.667	0.755083	Up in cochlea
1459602_at	12453	12453	Ccni	65.6441	30.5557	0.465475	Up in cochlea
1456010_x_at	15208	15208	Hes5	431.442	93.2871	0.216222	Up in cochlea
1418651_at	67946	67946	Spata6	187.356	142.898	0.762707	Up in cochlea
1433434_at	244810	244810	AW551984	136.639	38.5064	0.281812	Up in cochlea
1456371_a_at	71774	71774	1300007L22Rik	113.973	38.2515	0.335618	Up in cochlea
1423025_a_at	30953	30953	Schip1	679.709	344.006	0.506108	Up in cochlea
1440935_at	14783	14783	Grb10	426.465	210.425	0.493418	Up in cochlea
1436250_at	108832	108832	5430405G05Rik	59.5614	27.9538	0.469327	Up in cochlea
1418676_at	104360	104360	Isl2	169.284	46.8774	0.276916	Up in cochlea
1437218_at	14268	14268	Fn1	58.3813	18.0346	0.308911	Up in cochlea
1457164_at	277328	277328	Trpa1	101.823	26.6267	0.2615	Up in cochlea
1437339_s_at	18552	18552	Pcsk5	1240.45	742.251	0.598371	Up in cochlea
1455203_at	68162	68162	A930003A15Rik	139.47	23.0997	0.165624	Up in cochlea
1440559_at	15365	15365	Hmga2-ps1	72.2457	51.024	0.706257	Up in cochlea
1450448_at	20855	20855	Stc1	409.297	170.99	0.417765	Up in cochlea
1434172_at	12801	12801	Cnr1	314.168	121.36	0.386291	Up in cochlea
1449357_at	66952	66952	2310030G06Rik	725.676	445.671	0.614146	Up in cochlea
1440990_at	269152	269152	4832420M10	150.778	35.9224	0.238247	Up in cochlea
1436577_at	236915	236915	Arhgef9	85.8455	36.6528	0.426963	Up in cochlea
1433847_at	320609	320609	D330017J20Rik	188.859	16.0335	0.0848969	Up in cochlea
1428393_at	68404	68404	Nrn1	104.282	29.0133	0.278219	Up in cochlea
1457254_x_at	268567	268567	6330442E10Rik	461.714	232.15	0.502801	Up in cochlea
1440860_at	17116	17116	Mab21l1	35.9759	25.7682	0.716263	Up in cochlea
1426573_at	107029	107029	Me2	289.357	113.976	0.393893	Up in cochlea
1428077_at	72160	72160	2610024A01Rik	120.239	45.2281	0.376154	Up in cochlea
1444451_at	23850	23850	Pappa2	602.116	40.0126	0.0664532	Up in cochlea
1442160_at	329731	329731	7530404M11Rik	130.037	55.0588	0.42341	Up in cochlea
1432750_at	69243	69243	2810409C01Rik	612.65	245.044	0.399974	Up in cochlea
1416939_at	67895	67895	Pyp	1044.81	535.975	0.51299	Up in cochlea
1457682_at	71544	71544	9030420J04Rik	778.891	344.018	0.441677	Up in cochlea
1422692_at	20024	20024	Sub1	967.151	672.856	0.695709	Up in cochlea
1428221_at	78267	78267	4931406O17Rik	377.971	236.724	0.626302	Up in cochlea
1442917_at	432607	432607	LOC432607	238.635	74.7133	0.313086	Up in cochlea
1417303_at	192156	192156	Mvd	97.0145	73.9518	0.762276	Up in cochlea
1437113_s_at	18805	18805	Pld1	709.113	475.966	0.671213	Up in cochlea
1418666_at	19288	19288	Ptx3	99.163	34.8318	0.351258	Up in cochlea
1455447_at	268595	268595	D430019H16Rik	416.186	274.634	0.659883	Up in cochlea
1436475_at	11819	11819	Nr2f2	498.447	184.393	0.369935	Up in cochlea
1454903_at	18053	18053	Ngfr	273.701	101.66	0.371427	Up in cochlea
1436579_s_at	106263	106263	AI839402	60.4776	36.1057	0.59701	Up in cochlea
1440874_at	240726	240726	Slco5a1	398.462	35.463	0.0889996	Up in cochlea
1438782_at	269784	269784	Cntn4	397.11	166.622	0.419586	Up in cochlea
1424679_at	17116	17116	Mab21l1	92.3089	19.1102	0.207025	Up in cochlea
1427020_at	219151	219151	Scara3	3895.46	780.394	0.200334	Up in cochlea
1420345_at	56173	56173	Cldn14	332.98	178.231	0.53526	Up in cochlea
1450988_at	14160	14160	Lgr5	347.194	48.251	0.138974	Up in cochlea
1448669_at	50781	50781	Dkk3	2846.16	1383.76	0.486185	Up in cochlea
1433596_at	72685	72685	Dnajc6	247.653	143.969	0.581333	Up in cochlea
1435618_at	239157	239157	Pnma2	92.14	33.4082	0.362581	Up in cochlea
1453286_at	18845	18845	Plxna2	217.037	96.9142	0.446532	Up in cochlea
1439755_at	217692	217692	Sipa1l1	1315.56	929.438	0.706498	Up in cochlea
1437744_at	245446	245446	Slitrk4	75.9542	25.7337	0.338805	Up in cochlea
1418093_a_at	13645	13645	Egf	247.112	128.55	0.52021	Up in cochlea
1457105_at	329064	329064	Pkd2l1	182.242	58.6618	0.32189	Up in cochlea
1429197_s_at	29809	29809	Rabgap1l	241.81	54.9074	0.227068	Up in cochlea
1449166_at	66166	66166	S100a14	69.9964	57.4196	0.820322	Up in cochlea
1456903_at	19288	19288	Ptx3	75.8808	43.6273	0.574945	Up in cochlea
1426615_s_at	234593	234593	Ndrg4	2656.57	1009.05	0.379831	Up in cochlea
1455894_at	217057	217057	A230072I16Rik	264.253	203.818	0.771298	Up in cochlea
1452232_at	108150	108150	Galnt7	897.983	551.198	0.613818	Up in cochlea
1421101_a_at	16826	16826	Ldb2	503.942	249.353	0.494804	Up in cochlea
1439211_at	52020	52020	D17Ertd488e	132.253	15.3504	0.116068	Up in cochlea
1453125_at	20666	20666	Sox11	1382.07	422.181	0.30547	Up in cochlea
1457306_at	59001	59001	Pole3	425.813	313.333	0.735847	Up in cochlea
1427489_at	241226	241226	Itga8	384.616	51.7608	0.134578	Up in cochlea
1452270_s_at	65969	65969	Cubn	176.931	39.7077	0.224425	Up in cochlea
1433884_at	20979	20979	Syt1	1592.24	321.696	0.20204	Up in cochlea
1434165_at	209195	209195	Clic6	734.465	116.065	0.158027	Up in cochlea
1457133_at	70571	70571	Tcerg1l	267.996	136.512	0.50938	Up in cochlea
1456764_at	210027	210027	Slc35f3	206.789	38.1114	0.184301	Up in cochlea
1421841_at	14184	14184	Fgfr3	1080.98	93.5953	0.0865836	Up in cochlea
1417653_at	19293	19293	Pvalb	1815.53	408.105	0.224785	Up in cochlea
1435106_at	77569	77569	3732412D22Rik	1146.74	598.709	0.522097	Up in cochlea
1425895_a_at	15901	15901	Id1	694.12	364.558	0.525209	Up in cochlea
1455296_at	224129	224129	Adcy5	274.679	84.1899	0.306503	Up in cochlea
1451191_at	12904	12904	Crabp2	1229.64	337.846	0.274751	Up in cochlea
1428676_at	71753	71753	Tmprss6	1129.72	479.455	0.424403	Up in cochlea
1459183_at	230628	230628	LOC230628	231.69	114.21	0.492941	Up in cochlea
1452894_at	15572	15572	Elavl4	186.132	19.2675	0.103515	Up in cochlea
1454866_s_at	209195	209195	Clic6	1695.23	178.259	0.105153	Up in cochlea
1431297_a_at	71296	71296	4933436C20Rik	391.879	111.379	0.284218	Up in cochlea
1449571_at	22045	22045	Trhr	64.9394	13.1395	0.202335	Up in cochlea
1425575_at	13837	13837	Epha3	157.536	14.7253	0.0934729	Up in cochlea
1451857_a_at	77583	77583	5730593N15Rik	590.208	62.8715	0.106524	Up in cochlea
1434326_x_at	235431	235431	Coro2b	285.929	148.762	0.520276	Up in cochlea
1450181_at	13048	13048	Cutl2	83.7772	56.2628	0.671577	Up in cochlea
1428405_at	353502	353502	Hcfc1r1	1777.27	1138.97	0.640855	Up in cochlea
1429254_at	66333	66333	Aqp11	461.557	130.414	0.282553	Up in cochlea
1435772_at	16565	16565	Kif21b	299.736	86.9516	0.290094	Up in cochlea
1417612_at	15939	15939	Ier5	750.924	343.283	0.457148	Up in cochlea
1453045_at	77048	77048	4921537D05Rik	215.118	171.795	0.798605	Up in cochlea
1429384_at	70425	70425	Csnk1g3	898.438	517.462	0.575958	Up in cochlea
1435892_at	211961	211961	C230079D11Rik	256.528	141.125	0.550135	Up in cochlea
1429204_at	73047	73047	2900075A18Rik	66.1974	28.1326	0.42498	Up in cochlea
1426436_at	233806	233806	8430420C20Rik	545.577	293.352	0.537691	Up in cochlea
1434447_at	17295	17295	Met	857.947	510.117	0.594579	Up in cochlea
1456250_x_at	21810	21810	Tgfbi	3675.38	1531.35	0.416651	Up in cochlea
1455923_at	243043	243043	Kctd8	130.292	25.3644	0.194674	Up in cochlea
1428990_at	71928	71928	2310047K21Rik	69.2688	52.1387	0.752701	Up in cochlea
1431805_a_at	52428	52428	Rhpn2	463.906	185.763	0.400431	Up in cochlea
1452283_at	71323	71323	Rassf8	939.091	583.444	0.621286	Up in cochlea
1424650_at	72599	72599	Pdia5	989.714	491.121	0.496225	Up in cochlea
1443394_at	15364	15364	Hmga2	43.3531	23.6806	0.546226	Up in cochlea
1424008_a_at	71973	71973	Rbpms2	499.217	376.708	0.754598	Up in cochlea
1422682_s_at	114228	114228	Trygn16	67.9066	15.8767	0.233802	Up in cochlea
1447023_at	380887	380887	NA	169.633	30.4006	0.179214	Up in cochlea
1436588_at	246102	246102	Rttn	252.059	148.06	0.587403	Up in cochlea
1454672_at	18039	18039	Nefl	1096.35	553.394	0.504761	Up in cochlea
1434307_at	100201	100201	Tmem64	1439.27	777.146	0.539959	Up in cochlea
1439304_at	78603	78603	B230216N24Rik	43.3098	26.7146	0.616826	Up in cochlea
1457497_at	20979	20979	Syt1	32.7897	12.7337	0.388345	Up in cochlea
1460368_at	227157	227157	Mpp4	107.323	15.9814	0.14891	Up in cochlea
1438921_at	245000	245000	Atr	25.57	19.6598	0.768863	Up in cochlea
1416688_at	20616	20616	Snap91	1103.19	636.324	0.576804	Up in cochlea
1447606_x_at	66333	66333	Aqp11	193.65	77.2505	0.398919	Up in cochlea
1449294_at	66407	66407	Mrps15	684.031	478.29	0.699222	Up in cochlea
1425458_a_at	14783	14783	Grb10	4422.59	2838.22	0.641755	Up in cochlea
1423149_at	21402	21402	Skp1a	3819.1	3028.11	0.792887	Up in cochlea
1436942_at	320946	320946	A930035D04Rik	185.25	122.761	0.662678	Up in cochlea
1444992_at	58250	58250	Chst11	88.038	68.0456	0.772912	Up in cochlea
1419672_at	20745	20745	Spock1	648.002	200.085	0.308772	Up in cochlea
1424967_x_at	21956	21956	Tnnt2	142.395	44.4171	0.311928	Up in cochlea
1436965_at	280635	280635	Emilin3	340.982	137.826	0.404203	Up in cochlea
1448259_at	14314	14314	Fstl1	16049.3	10439.4	0.65046	Up in cochlea
1417581_at	56749	56749	Dhodh	308.598	179.787	0.582593	Up in cochlea
1435963_at	20357	20357	Sema5b	389.347	101.588	0.260919	Up in cochlea
1452380_at	13841	13841	Epha7	700.635	113.272	0.16167	Up in cochlea
1435035_at	108943	108943	Rg9mtd2	398.162	263.792	0.662523	Up in cochlea
1423437_at	14859	14859	Gsta3	21.9027	16.3385	0.745959	Up in cochlea
1437087_at	433926	433926	R75581	2472.25	959.835	0.388243	Up in cochlea
1450723_at	16392	16392	Isl1	3375.82	1298.17	0.38455	Up in cochlea
1421752_a_at	20724	20724	Serpinb5	108.97	30.1915	0.277063	Up in cochlea
1417802_at	66183	66183	1110032A04Rik	157.995	24.2191	0.15329	Up in cochlea
1456934_at	12307	12307	Calb1	428.008	13.1386	0.0306971	Up in cochlea
1448102_a_at	66317	66317	Wdr61	2856.91	2325.9	0.814131	Up in cochlea
1425040_at	73649	73649	Cybrd1	399.325	168.662	0.422368	Up in cochlea
1427528_a_at	13841	13841	Epha7	246.421	68.6336	0.278521	Up in cochlea
1426766_at	103712	103712	6330403K07Rik	2119.46	756.509	0.356935	Up in cochlea
1428741_at	15572	15572	Elavl4	125.663	36.4536	0.290091	Up in cochlea
1454846_at	105372	105372	AW544865	263.406	201.101	0.763465	Up in cochlea
1434914_at	270192	270192	Rab6b	265.068	103.019	0.388651	Up in cochlea
1440339_at	73762	73762	4833416E15Rik	655.832	258.32	0.393882	Up in cochlea
1436467_at	320833	320833	D230004N17Rik	46.8761	29.2298	0.623553	Up in cochlea
1436304_at	77220	77220	C030003D03Rik	324.243	218.922	0.67518	Up in cochlea
1435487_at	14804	14804	Grid2	289.549	177.858	0.614259	Up in cochlea
1424547_at	72605	72605	Car10	116.899	42.8804	0.366816	Up in cochlea
1415895_at	20646	20646	Snrpn	2121.27	1422.96	0.670806	Up in cochlea
1451450_at	67017	67017	2010011I20Rik	487.625	394.016	0.80803	Up in cochlea
1455033_at	329739	329739	B430201A12Rik	914.611	239.306	0.261648	Up in cochlea
1439191_at	14314	14314	Fstl1	1127.17	309.01	0.274147	Up in cochlea
1426044_a_at	18761	18761	Prkcq	624.511	173.479	0.277784	Up in cochlea
1442095_at	211961	211961	C230079D11Rik	226.06	124.945	0.552709	Up in cochlea
1423246_at	76299	76299	Txndc4	429.664	338.746	0.788397	Up in cochlea
1438531_at	320862	320862	A730054J21Rik	646.732	141.551	0.218872	Up in cochlea
1440331_at	320481	320481	9430079B08Rik	511.965	133.99	0.261717	Up in cochlea
1452151_at	223752	223752	BC021523	493.499	360.745	0.730995	Up in cochlea
1416778_at	20324	20324	Sdpr	2190.13	758.523	0.346338	Up in cochlea
1434190_at	20603	20603	Sms	967.035	250.753	0.2593	Up in cochlea
1424885_at	213417	213417	A630065K24Rik	38.3792	25.2613	0.658203	Up in cochlea
1434211_at	212531	212531	Sh3bgrl2	210.108	38.2218	0.181915	Up in cochlea
1419606_a_at	21955	21955	Tnnt1	269.257	101.584	0.377277	Up in cochlea
1442379_at	574403	574403	MGC99845	125.166	22.5074	0.17982	Up in cochlea
1434070_at	16449	16449	Jag1	1579.71	586.109	0.371023	Up in cochlea
1440780_x_at	78896	78896	1500015O10Rik	2367.92	366.81	0.154908	Up in cochlea
1452298_a_at	17919	17919	Myo5b	920.446	341.323	0.370823	Up in cochlea
1445918_at	83921	83921	Tmem2	30.9757	21.4265	0.691719	Up in cochlea
1429051_s_at	20666	20666	Sox11	1032.5	308.351	0.298645	Up in cochlea
1440745_at	70673	70673	Prdm16	163.674	49.9365	0.305096	Up in cochlea
1416761_at	15484	15484	Hsd11b2	381.173	102.827	0.269766	Up in cochlea
1439397_at	99456	99456	BB164513	1087.3	287.223	0.264162	Up in cochlea
1424970_at	75029	75029	Purg	2832.63	1868.2	0.659529	Up in cochlea
1432291_at	74093	74093	0610033M10Rik	92.7289	59.4928	0.641577	Up in cochlea
1436398_at	16842	16842	Lef1	171.952	98.9199	0.575275	Up in cochlea
1418046_at	17954	17954	Nap1l2	215.507	50.6437	0.234998	Up in cochlea
1451453_at	13143	13143	Dapk2	91.4675	57.2507	0.625914	Up in cochlea
1449038_at	15483	15483	Hsd11b1	274.603	96.6963	0.352131	Up in cochlea
1416700_at	74194	74194	Rnd3	666.707	255.922	0.383859	Up in cochlea
1416779_at	20324	20324	Sdpr	241.785	72.0774	0.298105	Up in cochlea
1438856_x_at	20724	20724	Serpinb5	222.004	12.917	0.0581836	Up in cochlea
1430655_at	70800	70800	4631405K08Rik	31.4653	18.7343	0.595394	Up in cochlea
[truncated: 249 more rows]
